RESEARCH ARTICLE

# Variation of DNA Methylation of Zebrafish Cells under Cold Pressure

Bingshe Han<sup>☉</sup>, Wenhao Li<sup>☉</sup>, Zuozhou Chen<sup>☉</sup>, Qiongqiong Xu, Juntao Luo, Yingdi Shi, Xiaoxia Li, Xiaonan Yan, Junfang Zhang\*

Key Laboratory of Aquacultural Resources and Utilization, Ministry of Education, College of Fishery and Life Science, Shanghai Ocean University, Shanghai, China

☉ These authors contributed equally to this work.

\* [jfzhang@shou.edu.cn](mailto:jfzhang@shou.edu.cn)

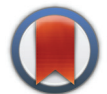

CrossMark  
click for updates

OPEN ACCESS

**Citation:** Han B, Li W, Chen Z, Xu Q, Luo J, Shi Y, et al. (2016) Variation of DNA Methylation of Zebrafish Cells under Cold Pressure. PLoS ONE 11(8): e0160358. doi:10.1371/journal.pone.0160358

**Editor:** Zongbin Cui, Chinese Academy of Sciences, CHINA

**Received:** April 9, 2016

**Accepted:** July 18, 2016

**Published:** August 5, 2016

**Copyright:** © 2016 Han et al. This is an open access article distributed under the terms of the [Creative Commons Attribution License](https://creativecommons.org/licenses/by/4.0/), which permits unrestricted use, distribution, and reproduction in any medium, provided the original author and source are credited.

**Data Availability Statement:** The data used in this study has been deposited in NCBI's Gene Expression Omnibus repository and are accessible through GEO accession number GSE71567.

**Funding:** This study was supported by grants from National Natural Science Foundation of China (grant No. 31372516 awarded to JZ), Shanghai Municipal Education Commission (Oriental scholar program awarded to JZ) and Grant No. 13ZR1419500 from Natural Science Foundation of Shanghai awarded to BH.

**Competing Interests:** The authors have declared that no competing interests exist.

## Abstract

DNA methylation is an essential epigenetic mechanism involved in multiple biological processes. However, the relationship between DNA methylation and cold acclimation remains poorly understood. In this study, Methylated DNA Immunoprecipitation Sequencing (MeDIP-seq) was performed to reveal a genome-wide methylation profile of zebrafish (*Danio rerio*) embryonic fibroblast cells (ZF4) and its variation under cold pressure. MeDIP-seq assay was conducted with ZF4 cells cultured at appropriate temperature of 28°C and at low temperature of 18°C for 5 (short-term) and 30 (long-term) days, respectively. Our data showed that DNA methylation level of whole genome increased after a short-term cold exposure and decreased after a long-term cold exposure. It is interesting that metabolism of folate pathway is significantly hypomethylated after short-term cold exposure, which is consistent with the increased DNA methylation level. 21% of methylation peaks were significantly altered after cold treatment. About 8% of altered DNA methylation peaks are located in promoter regions, while the majority of them are located in non-coding regions. Methylation of genes involved in multiple cold responsive biological processes were significantly affected, such as anti-oxidant system, apoptosis, development, chromatin modifying and immune system suggesting that those processes are responsive to cold stress through regulation of DNA methylation. Our data indicate the involvement of DNA methylation in cellular response to cold pressure, and put a new insight into the genome-wide epigenetic regulation under cold pressure.

## Introduction

DNA methylation of cytosine residues is a well-studied epigenetic mechanism implicated in multiple processes, such as genome function, gene transcription, imprinting and X-chromosome inactivation [1, 2]. Increasing number of studies show that DNA methylation plays an important role under various environmental pressures in some species [3–5]. In rice, widespread phosphate starvation-induced DNA methylation changes preferentially localize in transposable elements (TEs) close to highly induced genes [3]. In mouse liver and brain, highly

**Abbreviations:** MeDIP, Methylated DNA immunoprecipitation; CGI, CpG island; ChIP, Chromatin immunoprecipitation; GO, Gene ontology; TSS, Transcription start site; RPM, Reads per million; RPKM, Reads Per Kilobase per Million mapped reads; BSP, Bisulfite sequencing PCR; DMR, Differentially methylated regions; ROS, Reactive oxygen species.

variably DNA-methylated regions in environmental evolutionary adaptation were identified associated with development and morphogenesis [6]. In the plant, environmental stresses affect the epigenetic modifications and promote the activity of transposons for adaptation to the changing environment [7–10]. However, the role of DNA methylation in cold acclimation in fishes is still unclear.

Temperature is an important environmental factor that affects the life of fishes including development, sex determination, habit, and so on [11]. Fishes have been developing various adaptive changes for cold survival, including production of antifreeze glycoproteins (AFGP) [12], adaptive modification of enzyme protein structures [13], cold-efficient microtubule assembly [14], cold-adapted protein translocation [15], elevated mitochondrial densities [16], genomic expansion and gene loss [17, 18]. In addition to the mechanisms mentioned above, expression levels of many genes significantly change, contributing to adaptive changes of multiple processes including anti-oxidant system, apoptosis, development, immune system and so on [18]. In the transcriptomic study of cold acclimation in larval zebrafish, biological processes including RNA splicing, ribosome biogenesis and protein catabolic process were highly over-represented [19, 20]. However the mechanisms underlying the regulation of those genes are still not clear.

Zebrafish is a major model system for studies of development, disease and other biological processes. DNA methylation profiling in zebrafish using whole genome bisulfite sequencing and MeDIP method has been reported [21–24], mainly investigating DNA methylation in gametes and early development. In another study, reduced representation bisulfite sequencing (RRBS) was used to profile DNA methylation patterns in the brain and liver of the zebrafish [25]. It is also known that DNA methylation dynamics occur during early zebrafish development [22]. However, the relationship between DNA methylation and environmental stress in zebrafish has not yet been reported. We wonder if DNA methylation variation takes place under cold stress and how. To address this question, ZF4 cells were used to investigate DNA methylation variation under cold pressure to eliminate tissue specific variations.

In this study, we investigated the role of DNA methylation in cold acclimation of zebrafish (*Danio rerio*) embryonic fibroblast ZF4 cells by genome-wide MeDIP-seq analysis. Our data suggested that DNA methylation is involved in the regulation of gene expression of essential biological processes needed for cold acclimation, such as anti-oxidant, apoptosis, development, chromatin modification. It is interesting that the global DNA methylation level increased at 5 days after cold treatment and decreased at 30 days after cold treatment, which is closely related to methylation level of genes involved in folate biosynthesis. Our data also suggested that DNA methylation of non-coding regions may play important roles in cold acclimation. The present work provides a novel insight into the-role of DNA methylation in cold acclimation in fishes.

## Materials and Methods

### Cell culture and treatment

ZF4 cell line was purchased from the American Type Culture Collection (ATCC, Cat No. CRL 2050). The cells were grown at 28°C, 5% CO<sub>2</sub>, in Dulbecco's modified Eagle's medium/F12 nutrient mix (SH30023.01B, Hyclone, Thermo Scientific) supplemented with 10% fetal bovine serum (10099141, Gibco, Life technologies), 1% penicillin-streptomycin-glutamine solution (SV30082.01, Hyclone, Thermo Scientific). For cold treatment, ZF4 cells were seeded at 40–50% confluence and the next day moved into an incubator at 18°C, 5% CO<sub>2</sub>, in the same medium for up to 30 days. The cells were split every 3 days, counted with a hemocytometer and reseeded at their initial density. All experiments were performed in triplicate. For cell

viability assay, cells were prepared into a cell suspension and stained with 0.4% Trypan Blue solution (w/v) for 5 minutes, then counted with a hemocytometer.

## MeDIP-seq and statistical analysis

Genomic DNAs were isolated from ZF4 cells cultured at 28°C as control sample and at 18°C for 5 days (18°C /5d) and 30 days (18°C /30d), separately. Each condition has three biological replicates. Isolated genomic DNAs were sonicated and three biological replicates of sonicated genomic DNAs were pooled together for MeDIP-seq. The NEXTflex™ Methyl Sequencing 1 Kit (5118–01, Bioo Scientific) was used for end repair, adenylation, adapter ligation, methylated DNA enrichment and methylated DNA library construction according to the manufacturer's instruction. Paired-end sequencing was performed with Illumina HiSeq 2000 sequencing system. Base calling was performed with Illumina Casava1.7 software. The FASTX-Toolkit program was used to filter off low quality sequences from raw sequencing data. High quality paired-end MeDIP-seq sequences were aligned with the zebrafish genome (Zv9/danRer7) downloaded from iGenome ([http://support.illumina.com/sequencing/sequencing\\_software/genome.html](http://support.illumina.com/sequencing/sequencing_software/genome.html)) using Bowtie2 [26]. Methylated peaks were called using MACS software with default parameters. The three peak sets generated by MACS were merged using Bedtools for peaks with at least 1bp overlap to get a reference peak set (REF) for following analysis. Reads coverages were evaluated by read-count and reads per million (RPM) of REF, obtained by mapping Bowtie alignment results back to REF using Bedtools. DNA methylation pattern was revealed by hierarchical clustering of  $\log_2$  (RPM+1) values of all detected methylation peaks of all samples. Reads coverage for 28°C, 18°C /5d, 18°C /30d were compared with each other with Fisher's Exact Test and FDR. Peaks with at least 2-fold change and with  $FDR \leq 0.01$  were selected as differentially methylated regions (DMR) for further analysis.

## Bisulfite sequencing PCR (BSP)

Genomic DNAs were bisulfite converted using EZ DNA Methylation-Gold kit (D5005, ZYMO) according to the instruction manual. The PCR primers were designed by MethPrimer (<http://www.urogene.org/cgi-bin/methprimer/methprimer.cgi>). Primers for *esrra* gene locus are BSP-*esrra*-F: 5'-AGGGTATGAGAGGAAAAATGT TTTA-3' and BSP-*esrra*-R: 5'-TTTTTAAAATACACCCCAAACAAC-3'. Primers for *cacng6a* gene locus are BSP-*cacng6a*-F: 5'-TGGGTTTTTAAATTTAAATGAGTTG-3' and BSP-*cacng6a*-R: 5'-AACAAACATCAATAAC TCCACTAAC-3'. The PCR cycles were performed as following conditions: 94°C for 3 min, 37 cycles of 94°C for 30 s, 50°C for 30 s, 72°C for 30s, followed by 72°C for 5min. The PCR products were ligated into the pEASY-T5 Zero Cloning Vector (CT501, Transgen Biotech). Ten individual clones were sequenced in each sample.

## MeDIP-qPCR assay

MeDIP was performed using 1µg of DNA with EpiSeeker methylated DNA Immunoprecipitation (MeDIP) kit-DNA (ab117133, Abcam) according to the manufacturer's instructions. Real-time PCR was carried out with MeDIP DNAs using Roche Light Cycler 480II System and Fast Start Universal SYBR Green Master (ROX) (04913949001, Roche Applied Science). Frequency of DNA methylation of immunoprecipitated DNA vs input DNA was calculated. Statistical analysis was performed using GraphPad Prism 5 software. The Student *t* test was used on measurements of enrichment frequency from 3 experimental replicates. Primers for MeDIP-qPCR are shown in [S1 Table](#).

## Global DNA methylation level variation analysis of MeDIP-seq data

Global DNA methylation level analysis is based on pre-defined regions and RefSeq annotation. Pre-defined RefSeq genomic regions of upstream 3k, downstream 5k, 5'UTR, 3'UTR, exon and intron were downloaded from the UCSC table browser (<https://genome.ucsc.edu/>). Reads count along with RPKM for each region of each sample was calculated with Bedtools and an in-house R script. The RPKM value for each genomic region was compared for 18°C /5d vs 28°C, 18°C /30d vs 28°C, and 18°C /30d vs 18°C /5d using T test.

## Quantitation of global DNA methylation level

ZF4 cells were cultured at low temperature of 18°C up to 30 days. Genomic DNAs were isolated from ZF4 cells at time point of 1, 3, 5, 10, 15 and 30 days. Global DNA methylation levels were investigated by specifically measuring levels of 5-methylcytosine (5-mC) in an ELISA-like microplate-based format using MethylFlash Methylated DNA 5-mC Quantification Kit (P-1034-96, Epigenetics), following the manufacturer's instruction. All experiments were performed in triplicate.

## Wilcoxon signed-rank test for KEGG analysis

Ensembl transcripts associated with peaks were linked with KEGG [27] ortholog IDs and pathway IDs using online KAAS annotation tool [28]. Peak sets related with each KEGG pathway were tested with Wilcoxon signed-rank test [29] to see if they are differentially distributed in the comparisons of 18°C /5d vs 28°C, 18°C /30d vs 28°C, and 18°C /30d vs 18°C /5d.

## GO enrichment analysis for differentially methylated regions (DMRs)

The Ensembl genome annotation was downloaded from the UCSC table browser (<https://genome.ucsc.edu/>). REF genomic type (e.g. promoter, intron. . .) annotation along with Ensembl transcript IDs were obtained by intersection of REF and Ensembl genome annotation using Bedtools [30]. REF was further linked with Ensembl gene IDs and GO annotation by Ensembl transcript to gene mapping and gene to GO mapping from Ensembl Biomart (<http://www.ensembl.org/biomart/martview/7944b4c51c0cead1e48c21136c9c338f>). Genes related with at least one DMR were used for GO enrichment analysis with in-house R scripts incorporating the R package of GO.db (GO.db: A set of annotation maps describing the entire Gene Ontology. R package version 3.1.2).

## Detection of the intracellular ROS (Reactive oxygen species) level

Intracellular ROS generation was measured using the fluorescent probe 2, 7-dichlorofluorescein diacetate (DCFH-DA) (D6883, Sigma-Aldrich). After cold treatment at 18°C for 0, 3, 6, 12, 24, 72 and 120 hours, ZF4 cells were washed twice with PBS, and then incubated with 20 μM DCFH-DA for 30 min at room temperature. The cells were washed three times with PBS, and collected for flow cytometer assay. ROS levels were expressed as median fluorescence intensity. All experiments were performed in triplicate and the student *t* test was performed using GraphPad Prism 5 software.

## Reverse transcription-qPCR analysis

Total RNA was isolated using TRIzol reagent (15596–026, Life Technologies). Reverse transcription (RT) was performed using 1 μg of total RNA with Transcriptor First Strand cDNA synthesis kit (04379012001, Roche), according to the manufacturer's instructions. PCR amplification was performed for 2 min at 50°C and 10 min at 95°C, followed by 40 cycles at 95°C for

10 s, and annealing at 60°C for 10 min. Relative mRNA level was analyzed by the comparative CT method. Data were normalized to  $\beta$ -actin. Statistical analysis was performed using GraphPad Prism 5 software. The Student *t* test was used on measurements of gene expression from cold treated and normal cultured samples from 3 experimental replicates. Primers for RT-qPCR analysis are shown in [S2 Table](#).

## Chromatin immunoprecipitation (ChIP) analysis

ChIP was conducted according to a standard protocol [31]. In brief, cells were fixed in 1% formaldehyde for 6 min at room temperature. After lysis, samples were sonicated to a size range of 200 to 1,000 bps. Chromatin (150 to 200  $\mu$ g) was immunoprecipitated with antibodies for H3K4me3 (ab8580, Abcam), H3K27me3 (17–622, Upstate) or rabbit IgG (15006, Sigma-Aldrich). A 10% aliquot was removed as an input fraction. Quantitative real time PCR was performed with ChIP DNA and input DNA. Data were normalized to IgG control. Relative quantitation was carried out by the comparative threshold cycle (CT) method. Statistical analysis was performed using GraphPad Prism 5 software. The Student *t* test was used on measurements of enrichment from cold treated and normal cultured samples from 3 experimental replicates. Primers for ChIP-qPCR are shown in [S3 Table](#).

## Results

### Variation of the DNA methylation pattern of ZF4 cells under cold pressure

To investigate the effect of cold pressure on the DNA methylation pattern of ZF4 cells, cells were moved from the appropriate culture condition of 28°C to a lower temperature of 18°C. Cells showed obvious growth arrest in the first 5 days under cold exposure, then cell growth accelerated and reached a stable state about 25 days after cold treatment, although still slower than cell growth at 28°C ([S1A Fig](#)). Then the short-term (18°C, 5 days) and long-term (18°C, 30 days) acclimated ZF4 cells were exposure to a lethal temperature of 10°C, the data indicated that both acclimated ZF4 cells showed significantly higher viability than non-acclimated ZF4 cells under the lethal cold pressure ([S1B Fig](#)). It suggested that ZF4 cells can develop cold acclimation under cold pressure. Genomic DNAs isolated from ZF4 cells cultured at 28°C, 18°C for 5 or 30 days were subjected to MeDIP-seq analysis, respectively. A range of 20,955,724 to 24,197,166 raw reads were generated from three samples after paired-end sequencing. More than 70% sequence reads were mapped to the zebrafish genome (*Zv9/danRer7*). Peak detection was performed using Model-based Analysis for ChIP-Seq (MACS) software [32]. Detected methylation peaks are distributed in the promoter, exon, intron, downstream, and intergenic regions by 8%, 12% or 11%, 39% or 40%, 3%, 38%, respectively ([Fig 1A](#)). Distribution of methylation peaks in different genomic regions shows similar pattern in those three samples. From our data, almost half number of 51% DNA methylation in the zebrafish genome is located in the gene body regions. CpG islands were predicted by Takai's CpG island searcher using  $GCC = 55$  OE = 0.65 LENGTH = 500. About 7% of methylation peaks is located in CpG islands, which is consistent with the study of DNA methylation profiling in zebrafish brain [25]. DNA methylation pattern was generated by hierarchical clustering of  $\log_2^{(RPM+1)}$  values of all detected methylation peaks from all three samples. As shown in [Fig 1B](#), DNA methylation pattern is altered after cold treatment. Based on the cell response under cold stress, it is not surprising that DNA methylation patterns of 18°C /5d and 18°C /30d are different.

To verify the MeDIP-seq data, Bisulfite sequencing PCR (BSP) analysis was applied to investigate DNA methylation in two selected chromosomal loci. One locates at Chr.19:

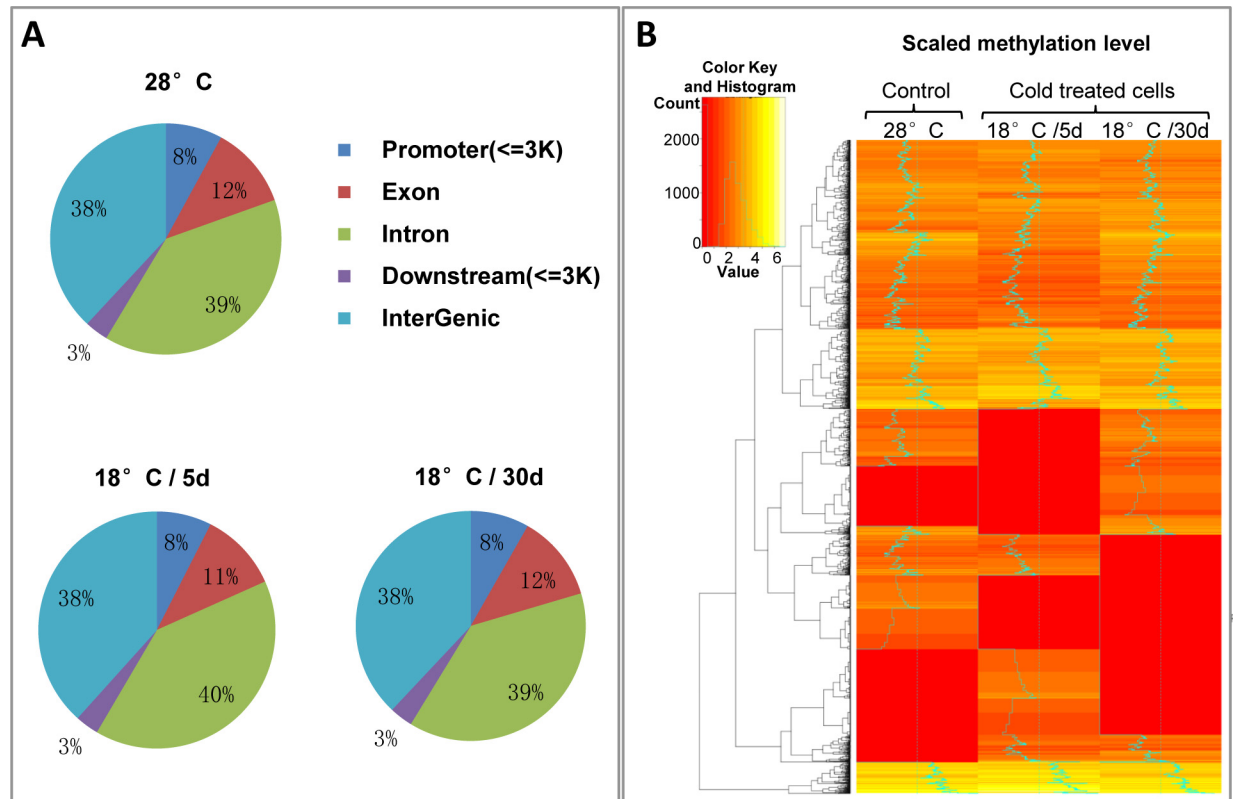

**Fig 1. Variation of DNA methylation pattern of ZF4 cells under cold pressure.** Genomic DNAs isolated from ZF4 cells cultured at 28°C, 18°C for 5 days and 30 days were subjected to MeDIP-seq analysis. **A.** Methylation peaks were distributed in promoter, exon, intron, downstream, intergenic regions as shown in the figure. **B.** Heat map of hierarchical clustering performed for all detected methylation peaks in all three samples shows variation of DNA methylation patterns under cold pressure. Each row represents a detected methylation peak.

doi:10.1371/journal.pone.0160358.g001

10406775–10407187, ~2.3 kb upstream of *cacng6a* (voltage-dependent calcium channel, gamma subunit 6a) gene. Another locates at Chr.21: 25996283–25997258, ~9 kb upstream of *esrra* (estrogen-related receptor alpha) gene. It showed that percentage of methylated C in CpGI upstream of the two genes decreased after cold treatment, which is consistent with the MeDIP-seq data (S2 Fig). MeDIP-qPCR assay was also used to analyze seven gene loci: *gstk* (glutathione S-transferase kappa 1), *kdm4a* (lysine (K)-specific demethylase 4A), *aquaporin 1a*, *camk2a* (calcium/calmodulin-dependent protein kinase II alpha), *cacng6a*, *esrra* and an uncharacterized gene (S3 Fig). All MeDIP-qPCR data are consistent with the MeDIP-seq data (S4 Table).

### DNA methylation level increased in short-term cold treatment

For analysis of DNA methylation level variation, Bedtools [30] and an in-house R script were used for calculating Reads Per Kilobase per Million mapped reads (RPKM) for multiple types of genomic regions of each sample. The RPKM values were compared between different samples (18°C / 5d vs 28°C, 18°C / 30d vs 28°C and 18°C / 30d vs 18°C / 5d) using T test. Our data showed that DNA methylation levels of different genomic regions increased 5 days after cold treatment. And 30 days after cold treatment, DNA methylation levels in upstream, downstream, intron and repeat sequences became lower than those of control cells (Fig 2). The corrected P values of multiple testing corrections (False Discovering Rate, FDR) of the

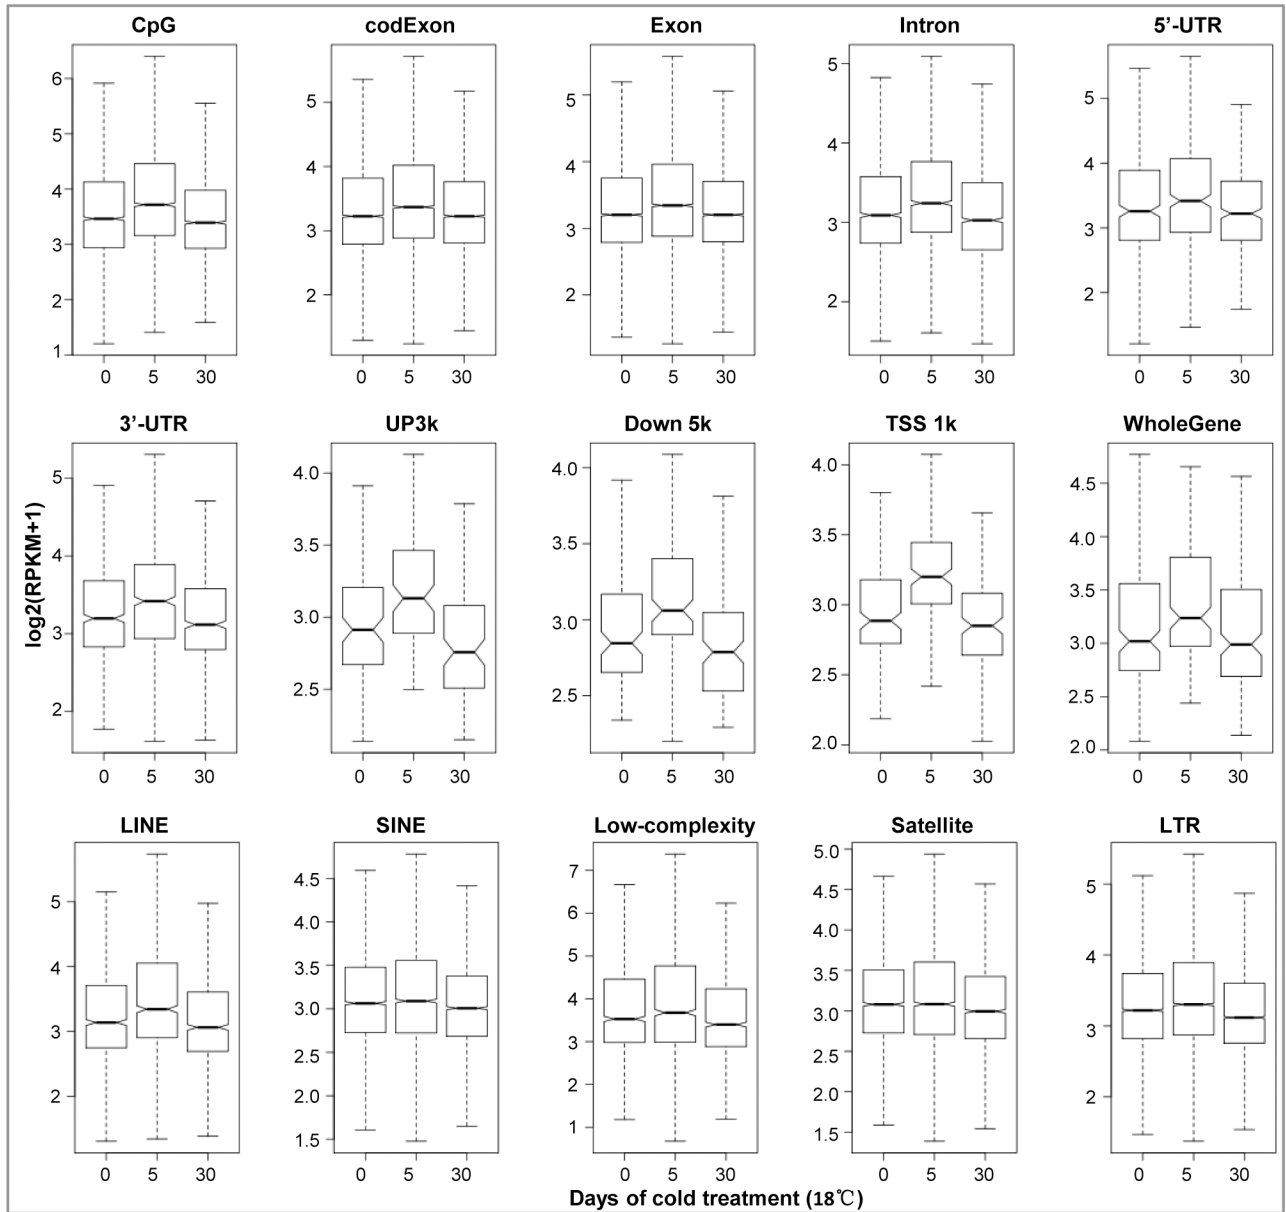

**Fig 2. DNA methylation levels of different genomic regions under cold pressure.** DNA methylation level of each genomic region from three samples (28°C, 18°C /5d, 18°C /30d) was shown as  $\log_2(\text{RPKM}+1)$ . The RPKM value of each genomic region was compared as 18°C /5d vs 28°C, 18°C /30d vs 28°C and 18°C /30d vs 18°C /5d using T test. The corrected P values of FDR are shown in Table 1. CpG: CpG island; codexon: coding regions of exon; UP3k: regions within 3 kbs upstream gene; Down5k: regions within 5 kbs downstream gene; TSS 1k: regions within  $\pm 1$  kb around transcription start site; LINE: long interspersed nuclear element; SINE: short interspersed nuclear element; Low complexity: low complexity DNA; Satellite: Satellite DNA; LTR: long terminal repeat.

doi:10.1371/journal.pone.0160358.g002

comparisons are shown in Table 1. The variation of DNA methylation level was also confirmed by quantitation assay of global genomic DNA methylation with Methyl Flash Methylated DNA 5-mC Quantification Kit. Our data showed that DNA methylation level increased after cold treatment and reached a peak on the 5th day then decreased to a level slightly lower than that of control cells 30 days after cold treatment (S4A Fig). By contrast, the global DNA methylation level of ZF4 cells remained unchanged after 5 and 30 days at 28°C (S4B Fig), indicating ZF4

**Table 1. FDRs of the methylation level comparisons from three different samples (28°C, 18°C/5d and 18°C/30d).**

| Genomic regions | 18°C/5d vs 28°C | 18°C/30d vs 28°C | 18°C/30d vs 18°C/5d |
|-----------------|-----------------|------------------|---------------------|
| CpG             | 7.790230e-36    | 0.000000e+00     | 0.000000e+00        |
| Codexon         | 1.002201e-25    | 0.000000e+00     | 0.000000e+00        |
| Exon            | 1.561321e-25    | 0.000000e+00     | 0.000000e+00        |
| Intron          | 1.555422e-10    | 0.000000e+00     | 0.000000e+00        |
| UTR5            | 1.810113e-02    | 5.875863e-182    | 6.651023e-189       |
| UTR3            | 3.028749e-06    | 0.000000e+00     | 0.000000e+00        |
| UP 3K           | 4.952519e-03    | 6.974608e-65     | 1.292772e-66        |
| Down 5K         | 3.582671e-04    | 1.817584e-87     | 2.162776e-86        |
| TSS (1K)        | 8.000152e-05    | 4.503675e-104    | 8.264075e-109       |
| Wholegene       | 9.338125e-04    | 4.102350e-109    | 7.909553e-114       |
| LINE            | 3.235575e-08    | 1.211646e-02     | 1.150671e-15        |
| SINE            | 7.867506e-02    | 8.986845e-05     | 2.826310e-08        |
| Low-complexity  | 1.361181e-03    | 1.106698e-06     | 7.460555e-15        |
| Satellite       | 6.856858e-02    | 8.638236e-06     | 1.245566e-09        |
| LTR             | 1.243673e-11    | 9.470906e-17     | 9.124971e-50        |

doi:10.1371/journal.pone.0160358.t001

cells were stable and maintained constant DNA methylation level in this study. Above data indicated that genome-wide DNA methylation variation occurred in response to cold stress.

### Folate biosynthesis pathway was significantly hypomethylated after short-term cold exposure

Wilcoxon signed-rank test [33] was applied to identify Kyoto Encyclopedia of Genes and Genomes (KEGG) pathways of which RPKM values are differentially distributed in any of the two sample pairs (18°C/5d vs 28°C, 18°C/30d vs 28°C). 5 KEGG pathways were identified as differentially distributed that meet the criteria of P value  $\leq 0.05$  and Median RPM Ratio  $> = 1.1$  or  $\leq 1/1.1$  (Table 2, Fig 3A). They are ko00524 (Butirosin and neomycin biosynthesis), ko00601 (Glycosphingolipid biosynthesis—lacto and neolacto series), ko00790 (Folate biosynthesis), ko00140 (Steroid hormone biosynthesis) and ko00591 (Linoleic acid metabolism). It's interesting that folate biosynthesis pathway was remarkably hypomethylated in 5-day cold treated cells. Genes involved in folate biosynthesis pathway were detected hypomethylated (Fig 3B), including GTP cyclohydrolase I (*gch*), GTP cyclohydrolase 2 (*gch2*), dihydropteridine reductase (*qdpr*), *mocs1* (*moaA*, molybdenum cofactor biosynthesis protein), *mocs2* (*moaE*, molybdopterin synthase catalytic subunit), alkaline phosphatase (*phoA*, *phoB*), folylpolyglutamate synthase (*fpgs*) and dihydrofolate reductase (*folA*). Expression of *gch1* and *gch2* were detected up-regulated after cold treatment, consistent with decreased DNA methylation of those two genes (Fig 3C). Folate is well known as an important active methyl-group donor in

**Table 2. Wilcoxon signed-rank test of KEGG in cold treatment cells (Median RPM Ratio  $> = 1.1$  or  $\leq 1/1.1$ , median\_test P value  $\leq 0.05$ ).**

| Ko ID   | Ko_median 18°C/5d vs 28°C  | P-value    | Ko description                                           |
|---------|----------------------------|------------|----------------------------------------------------------|
| ko00524 | 1.103                      | 0.04686926 | Butirosin and neomycin biosynthesis                      |
| ko00601 | 1.1395                     | 0.01222566 | Glycosphingolipid biosynthesis—lacto and neolacto series |
| ko00790 | 0.508                      | 0.02300543 | Folate biosynthesis                                      |
| Ko ID   | Ko_median 18°C/30d vs 28°C | P-value    | Ko description                                           |
| ko00140 | 1.1265                     | 0.00831028 | Steroid hormone biosynthesis                             |
| ko00591 | 1.137                      | 0.03674186 | Linoleic acid metabolism                                 |

doi:10.1371/journal.pone.0160358.t002



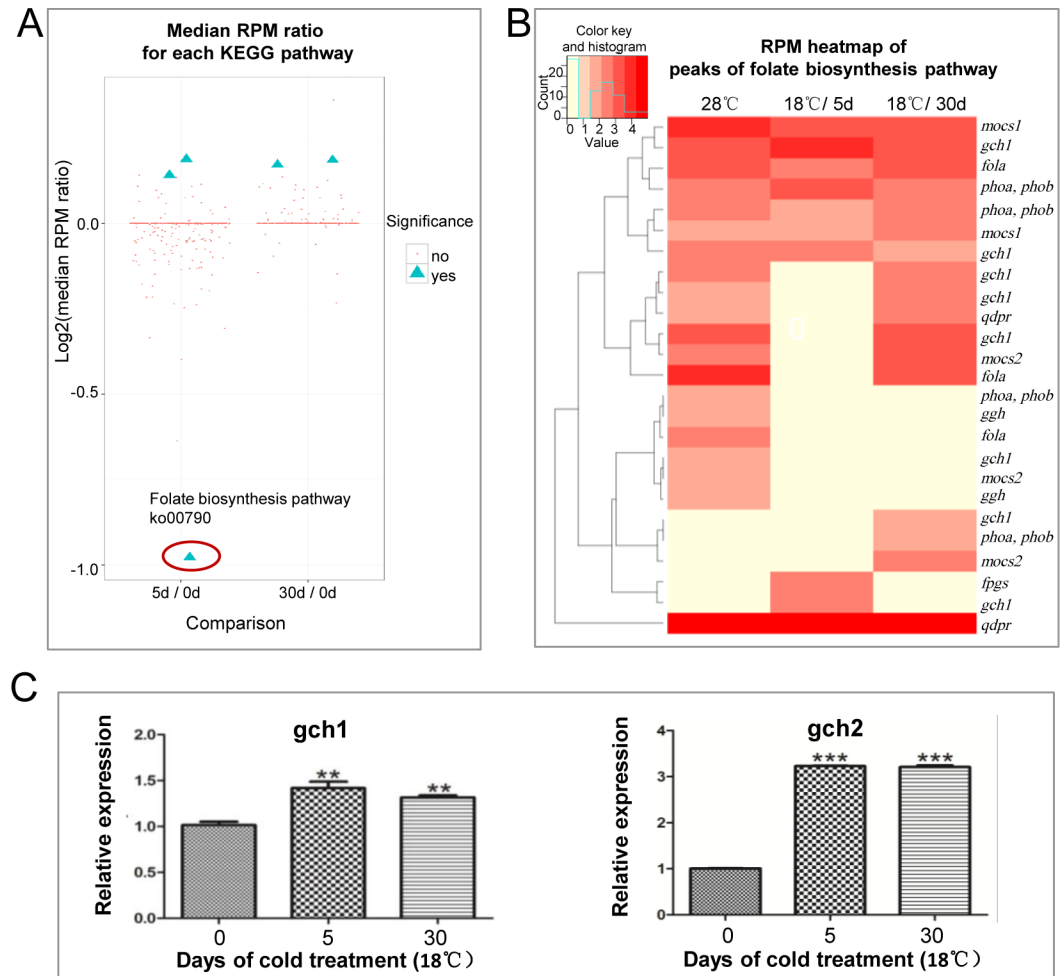

**Fig 3. Folate biosynthesis pathway (ko00790) was differentially distributed in 5-day cold treated cells.** A. Differentially distributed KEGG pathways in cold treated cells compared with control cells. Wilcoxon signed-rank test was applied to identify KEGG pathways of which related peak-RPM values are differentially distributed in any of the two sample pairs (5d/0d: 18°C /5d vs 28°C, 30d/0d: 18°C /30d vs 28°C). We identified 5 KEGG pathways as differentially distributed that meet the criteria of P value  $\leq 0.05$  and Median RPM Ratio  $> 1.1$  or  $\leq 1/1.1$  (marked by blue solid triangles). Red dots present non-significantly changed KEGG. Folate biosynthesis pathway (ko00790) is marked by red circle. B. RPM heatmap of methylation peaks of folate biosynthesis pathway. Peak-RPM of folate biosynthesis pathway in three different samples (28°C, 18°C /5d, 18°C /30d) is shown by the density of the red color. C. RT-qPCR analysis of *gch1* and *gch2* genes. Relative expression was carried out by the comparative threshold cycle (CT) method. Statistical analysis was performed using GraphPad Prism 5 software. The Student *t* test was used on measurements from 18°C /5d, 18°C /30d and 28°C samples from 3 experimental replicates.

doi:10.1371/journal.pone.0160358.g003

organisms, and the amount of the folate directly affects methylation reaction [34]. Considering that global DNA methylation level was up-regulated at the same time point, there might be a direct correlation between DNA methylation and folate biosynthesis activity under cold pressure.

### Gene Ontology (GO) enrichment analysis of differentially methylated regions (DMRs)

To explore biological significance of DNA methylation variation under cold pressure, we used Gene Ontology analysis to examine the functional enrichments of genes with cold related

differential methylation. For identification of differentially methylated regions (DMRs), reads coverage for 28°C, 18°C /5d and 18°C /30d were compared with each other using Fisher's Exact Test and FDR. Peaks with at least 2-fold change and with  $FDR < 0.01$  were selected as DMRs. DMRs are distributed in different chromosomal regions, including promoter, exon, intron and intergenic regions. There are 12,590 methylation peaks altered in both 5-day and 30-day cold treated cells, compared with control cells, and we named these altered regions as cold-related methylation regions (CRMs). It was reported that 87% of active promoters are located within 2.5k upstream of transcription start site (TSS) [35]. Regions located within 3 kb upstream of TSS are considered as promoter regions [36, 37]. About 8% of CRMs are located in promoter regions. The majority of CRMs are located in intergenic regions.

GO enrichment analysis was performed in both 5-day and 30-day cold treated cells compared with control cells. Genes related with at least one DMR are used for the analysis. Those with P value  $\leq 0.05$  and ratio  $\geq 1.3$  were considered as significantly enriched GO (S5 Table). Totally 203 GO categories were identified enriched after cold treatment. The enriched GO categories with P value  $\leq 0.05$  and ratio  $\geq 1.5$  are shown in Fig 4. Enriched GOs conduct biological processes such as anti-oxidant activity, regulation of response to stimulus, lipid metabolism, nucleoside-triphosphatase regulator activity, calmodulin binding, calcium ion transport, regulation of developmental process and so on. It suggested that these biological processes might be involved in cellular response to cold pressure though DNA methylation regulation.

### Altered DNA methylation in promoter regions is associated with gene expression in cold acclimation

It is well documented that DNA methylation level at promoter regions is highly related to gene expression [38, 39]. We pursued how DNA methylation variation affects gene expression under cold pressure. As mentioned above, only 8% of CRMs locate in gene promoter regions. Totally 1,024 genes were detected with altered DNA methylation in promoter regions after cold treatment (S4 Table). These genes are mostly involved in biological processes previously reported related to cold adaptation [18], including apoptosis, antioxidant system, chromatin modifying system, transportation, energy metabolism and immune system. Expression of *p53*, *atp5j* (ATP synthase), *epb41b* (erythrocyte membrane protein band 4.1b) and *trpm4* (transient receptor potential cation channel, subfamily M, member 4) genes involved in apoptosis, energy metabolism, development and transportation were analyzed. MeDIP-qPCR data of these genes showed the same trend with MeDIP-seq data (Fig 5A and 5B). By contrast, MeDIP-qPCR showed DNA methylation levels of these genes were stable in ZF4 cells cultured at 28°C for 5 or 30 days (S5A Fig). RT-qPCR data showed that mRNA levels of *atp5j*, *epb41b* and *trpm4* were changed and negatively related to DNA methylation variation (Fig 5C). By contrast, mRNA levels of these genes showed nonsignificant changes in ZF4 cells cultured at 28°C for 5 or 30 days (S5B Fig). However, mRNA level of *p53* gene is not negatively related to DNA methylation variation at the promoter region.

It is reported that anti-ROS (Reactive oxygen species) is a major protective process in cold adaptation in Antarctic fishes [18]. In our study, ROS level increased in cold treated ZF4 cells (Fig 6A). What's interesting is DNA methylation changes were detected in promoter regions of a number of genes involved in anti-oxidant system, including *gstk* (glutathione S-transferase kappa 1), *selenbp1* (selenium binding protein 1), *coa3* (cytochrome C oxidase assembly factor 3), *txnip* (thioredoxin interacting protein), *osgin2* (oxidative stress induced growth inhibitor family member 2) (Fig 6B). Except for *osgin2* gene, above mentioned genes were hypomethylated in their promoter regions after cold treatment. As a sensor of ROS, *selenbp1* gene was selected for detailed analysis. DNA methylation at ~3kb upstream of *selenbp1* gene remarkably

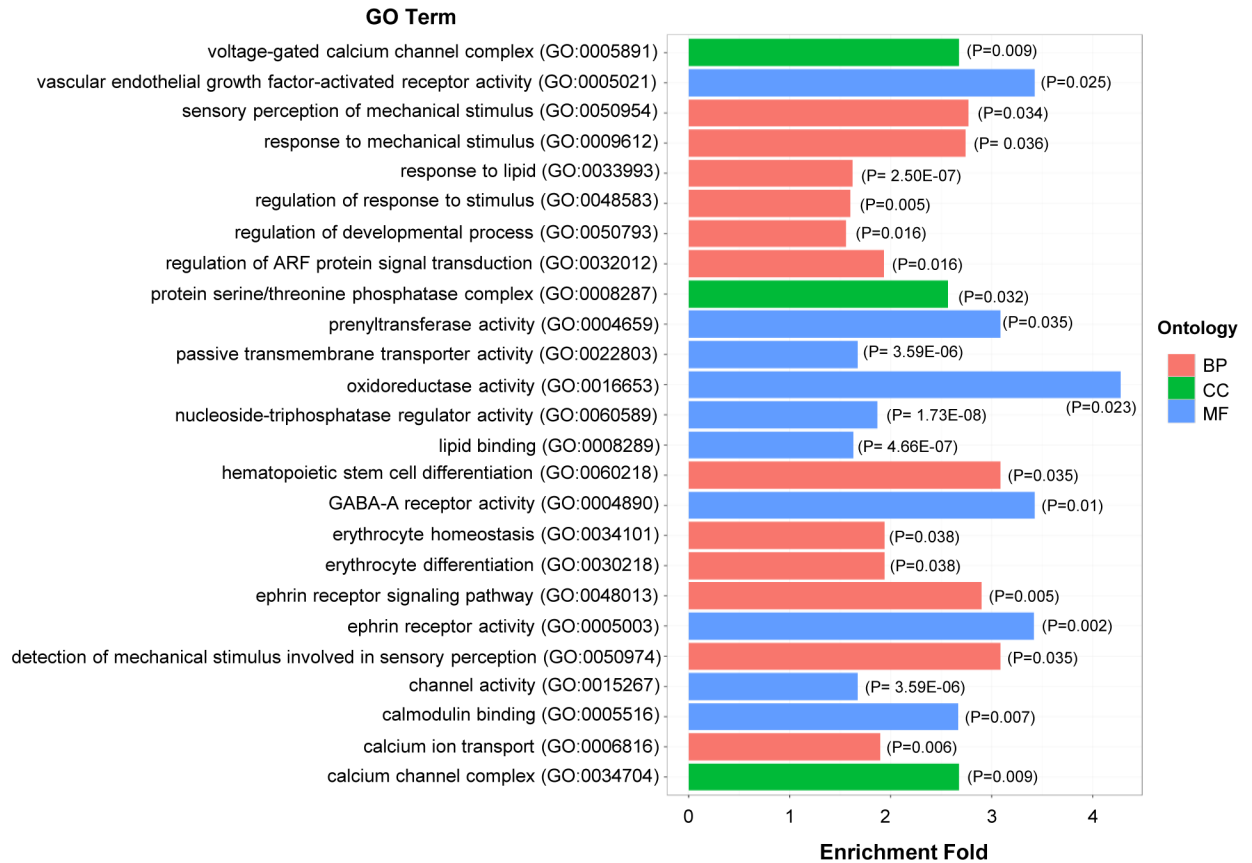

**Fig 4. Enriched GO categories under cold pressure.** GO enrichment analysis was performed in both 5-day and 30-day cold treated cells (cultured at 18°C) compared with control cells (cultured at 28°C). Genes related with DMRs were subjected to the analysis. GOs with ratio > 1.5 and P value <= 0.05 are shown in the figure. P values for enrichment of GO categories are shown in the figure.

doi:10.1371/journal.pone.0160358.g004

decreased under cold stress (Fig 6C and 6D), but remained unchanged at 28°C within 30 days (S5A Fig). RT-qPCR analysis showed that expression of the gene increased, consistent with remarkable decline of DNA methylation at the promoter region (Fig 6E). Our data suggested anti-ROS activity increased to protect cells from cold pressure through DNA methylation regulation.

Epigenetic regulation of gene expression involves multiple processes including covalent modifications of DNA, histones and chromatin structure. To investigate the possibility that other epigenetic mechanisms compromise the action of DNA methylation in the regulation of specific genes mentioned above, we did chromatin immunoprecipitation assay (ChIP-qPCR) in promoter regions of *p53* and *selenbp1* gene with positive (H3K4me3) and repressive (H3K27me3) histone marks. Enrichment of histone modifications at promoter regions of both genes also changed after cold treatment (Fig 7). And the state of histone modification marks is more consistent with gene expression. Our data suggested that multiple epigenetic mechanisms are involved in cold induced gene expression alteration.

## Discussion

DNA methylation is a major epigenetic mechanism that regulates gene expression. Increasing number of studies suggest environmentally-induced DNA methylation changes contribute to

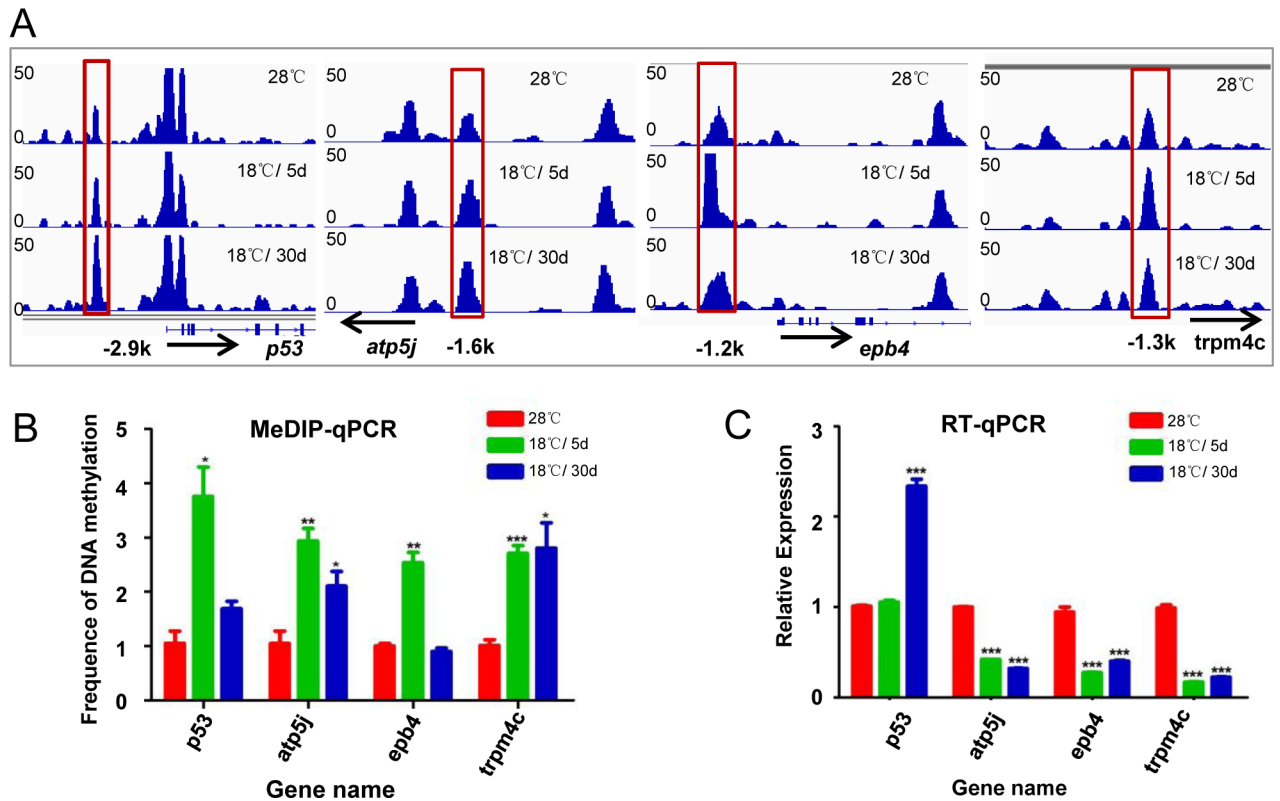

**Fig 5. DNA methylation in promoter regions of cold-related genes and expression analysis.** A. IGV images created from MeDIP-seq data for *p53*, *atp5j*, *epb4* and *trpm4c* gene loci. Black arrows show the transcriptional direction of genes. Red boxes show differentially methylated peaks upstream of genes. B. MeDIP-qPCR analysis of *p53*, *atp5j*, *epb4* and *trpm4c*. Frequency of DNA methylation was calculated by the comparative threshold cycle (CT) method. C. RT-qPCR analysis of *p53*, *atp5j*, *epb4* and *trpm4c*. Relative quantitation was carried out by the comparative threshold cycle (CT) method. Statistical analysis was performed using GraphPad Prism 5 software. The student *t* test was used on measurements from 18°C/5d, 18°C/30d and 28°C samples from 3 experimental replicates. Error bars represent standard deviations (SD) (n = 3). Data are normalized to  $\beta$ -actin. An asterisk represents significant difference compared to 28°C sample (P<0.05). \*\*: P<0.01, \*\*\*: P<0.001.

doi:10.1371/journal.pone.0160358.g005

adaptive phenotypic variation, which influences survival or/and provides a substrate for selection [40]. Although relationship between low temperature and DNA methylation in plants has been reported [41–43], the roles of DNA methylation and other epigenetic mechanisms in cold acclimation are still unclear, despite of increasing number of studies to understand the mechanisms of cold acclimation in fishes.

Zebrafish is a useful model organism in developmental biology and genetic studies. It is reported that zebrafish showed decreased metabolic rate when experimentally acclimated at 18°C for 28 days [44], and CDC48 mRNA level increased significantly in zebrafish cells after 25 days at 15°C to promote cell proliferation [45]. Here we cultured zebrafish ZF4 cells at 18°C for 5 and 30 days for short and long-term cold acclimation and investigated the role of DNA methylation in this process.

Using genome-wide MeDIP-seq analysis, we obtained the DNA methylation profile of ZF4 cells and detected its variation in short-term (18°C/5d) and long-term (18°C/30d) cold treated cells. We found that DNA methylation profile significantly changed both 5 days and 30 days after cold exposure. Expression levels of many genes of multiple well studied cold responsive biological processes showed negative correlation with DNA methylation in the promoter

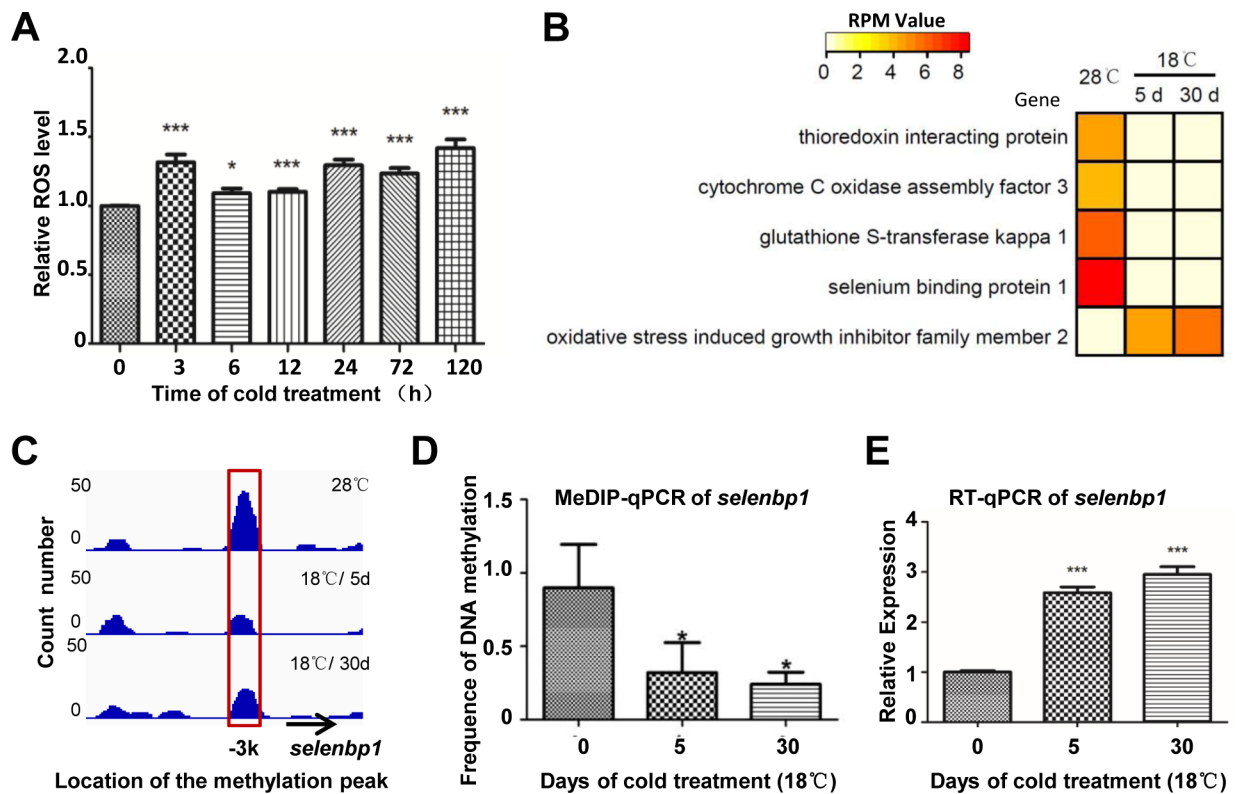

**Fig 6. Anti-ROS genes were hypomethylated under cold pressure.** A. Cold stress induced ROS production in ZF4 cells. ZF4 cells were treated with cold stress at 18°C for 3 h, 6 h, 12 h, 1 d, 3 d and 5 d. The DCF positive cells were measured by flow cytometric analysis. Error bars represent standard deviations (SD) (n = 3). An asterisk represents significant difference of ROS level compared to 28°C sample (P<0.05). \*\*: P<0.01, \*\*\*: P<0.001. B. Heatmap of RPM values of DNA methylation at promoter regions of anti-ROS genes. C. IGV image created from MeDIP-seq data for *selenbp1* gene. Black arrow shows the transcriptional direction of the gene. Red box shows differentially methylated peaks upstream of the gene. D. MeDIP-qPCR analysis of *selenbp1* gene. Frequency of DNA methylation was calculated by the comparative threshold cycle (CT) method. E. RT-qPCR analysis of *selenbp1* gene. Relative quantitation was carried out by the comparative threshold cycle (CT) method. Error bars represent standard deviations (SD) (n = 3). Data are normalized to  $\beta$ -actin. An asterisk represents significant difference compared to 28°C sample (P<0.05). \*\*: P<0.01, \*\*\*: P<0.001.

doi:10.1371/journal.pone.0160358.g006

regions, suggesting DNA methylation is closely involved in the regulation of those genes under cold pressure.

Most cold responsive pathways have been accepted essential for cold survival and cold adaptation. For example, enhanced anti-ROS activity has been reported as the principal mechanism for cold adaptation via protecting cells from cold induced ROS [18]. In this study, genes of anti-ROS system were detected hypomethylated under cold pressure, which at least partly account for the increased anti-ROS activity required for cold acclimation. Surprisingly, consistent with the report that cold exposure down-regulates zebrafish hematopoiesis [46], DNA methylation in the promoter region of *erythrocyte membrane protein band 4.1b (epb4.1b)* changed significantly after cold treatment, and mRNA level of *epb4.1b* was down-regulated (Fig 5C), indicating this change is not unique in blood cells. Genes involved in chromatin modifying were affected significantly in cold treated cells, such as *lysine (K)-specific demethylase 4A (kdm4a)*, *methyltransferase like 6 (mettl 6)*, *histidine decarboxylase (dhc)*, suggesting the involvement of additional epigenetic mechanisms (S4 Table). Those data indicate that DNA methylation in promoter regions may play important roles in cold acclimation of fish cells.

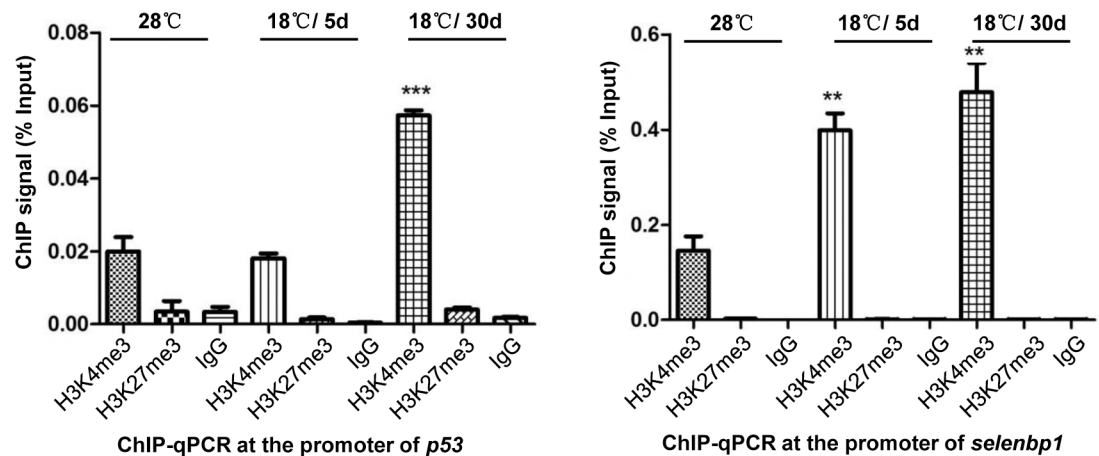

**Fig 7. Enrichment of H3K4me3 and H3K27me3 at promoter regions of p53 and selenbp1 gene.** ChIP assays were performed in 28°C, 18°C/5d and 18°C/30d samples with H3K4me3, H3K27me3 and IgG antibodies. Primers specific for the promoters of *p53* (A) and *selenbp1* (B) were used for quantitative PCR of ChIP DNAs. Relative quantitation was carried out by the comparative threshold cycle (CT) method. Statistical analysis was performed using GraphPad Prism 5 software. The Student *t* test was used on measurements of enrichment from 18°C/5d, 18°C/30d and 28°C samples from 3 replicates. Error bars represent standard deviations (SD) (n = 3). An asterisk represents significant difference of enrichment compared to 28°C sample (P<0.05). \*\*: P<0.01, \*\*\*: P<0.001.

doi:10.1371/journal.pone.0160358.g007

Global genomic DNA methylation level increased in short-term cold treated cells and then decreased to a slightly lower level in long-term cold acclimated cells, although the trends of DNA methylation of many cold responsive genes mentioned above are same at both time points. It's interesting that genes of folate biosynthesis pathway are significantly hypomethylated after short-term cold exposure in ZF4 cells, so that change of folate biosynthesis activity shows the same trend with global genomic DNA methylation level. Considering that folate is a key active methyl-group donor for DNA methylation [34, 47, 48], the correlation between folate biosynthesis, DNA methylation, and short-term cold response will be explored. Folate not only affects DNA methylation reaction, but also may play roles in cold adaptation via other mechanisms. Anti-oxidative effects of folic acid have been reported [49, 50], and folate can alleviate cold-induced elevation of homocysteine and lipid peroxidation [51], suggesting another role of folate biosynthesis in cold response of fish cells.

The majority of CRMs are located in non-coding regions, indicating DNA methylation in non-coding regions might play more important roles in gene regulation under cold pressure. It is widely accepted that many non-coding DNAs, including enhancer, repressor, insulator regulatory elements and small RNAs genes, play important roles in gene regulation involving multiple processes. It is also reported recently that DNA methylation in enhancer regions [52], insulator regions [53], and non-coding RNAs gene regions [54] is related with gene expression regulation, so DNA methylation of those non-coding regions might also play roles during cold acclimation in fish cells. In our study, DNA methylation levels in repeat sequences decreased in long-term cold acclimation cells, which could contribute to understanding of the extensive duplication of LINES (Long interspersed nuclear elements) in the Antarctic species under constant cold pressure [18].

DNA methylation is not the only epigenetic mechanism involved in cold acclimation in fish cells. Our data showed that altered enrichment of two histone modifications in promoter regions of two cold responsive genes (*p53* and *selenbp1*) affect gene expression, indicating other epigenetic mechanisms might play roles in cold acclimation of fish cells. Variation of DNA methylation and expression of chromatin modifying enzymes under cold pressure in this study also indicates the involvement of multiple epigenetic mechanisms. It is interesting to

investigate how other epigenetic mechanisms, such as histone modifications and chromatin structures, are involved in cold acclimation.

Our study indicated fish cells possess the cold tolerance ability under low temperature and DNA methylation is extensively involved in this acclimation process.

## Supporting Information

**S1 Fig. Growth and viability assay of ZF4 cells under cold pressure.** A. ZF4 cells were cultured at 18°C for up to 30 days. Long-term growth assay were performed for 0, 5, 10, 15, 20, 25 and 30 days. B. ZF4 cells were cultured at 18°C for 5 or 30 days for short-term or long-term acclimation, then acclimated and non-acclimated (28°C) ZF4 cells were exposure to 10°C for 3 days, the cell viability was measured by Trypan blue exclusion test.  
(PDF)

**S2 Fig. Bisulfite sequencing PCR (BSP) assay for *esrra* and *cacng6a* gene loci.** Genomic DNAs from different samples were bisulfite converted and amplified with specific primers for *esrra* (A) and *cacng6a* loci (B). Ten individual clones were sequenced for each sample. IGV images created from MeDIP-seq data for *esrra* locus are shown in Fig A. Black dots present methylated CpG and circles present un-methylated CpG. Percentage of relative methylated CpGs is shown in the figure.  
(PDF)

**S3 Fig. MeDIP-qPCR assay of selected gene loci.** Isolated genomic DNAs were subjected to MeDIP assay. Frequency of DNA methylation of immunoprecipitated DNA was calculated by the comparative threshold cycle (CT) method. Statistical analysis was performed using GraphPad Prism 5 software. The Student t test was used on measurements from 28°C, 18°C /5d and 18°C /30d samples from 3 experimental replicates. An asterisk represents significant difference compared to 28°C sample ( $P < 0.05$ ). \*\*:  $P < 0.01$ , \*\*\*:  $P < 0.001$ .  
(PDF)

**S4 Fig. Quantitation assay of global genomic DNA methylation of ZF4 cells under cold pressure.** Genomic DNAs were isolated from cells cultured at 18°C (A) or 28°C (B) for indicated times. Quantitation assay of global genomic DNA methylation was performed with MethylFlash Methylated DNA 5-mC Quantification Kit. Percentage of DNA methylation was calculated according to the protocol. Error bars represent standard deviations (SD) ( $n = 3$ ). An asterisk represents significant difference of signal compared to 28°C sample ( $P < 0.05$ ). \*\*:  $P < 0.01$ . \*\*\*:  $P < 0.001$ .  
(PDF)

**S5 Fig. DNA methylation levels in promoter regions and mRNA levels of cold-related genes in ZF4 cells under normal culture condition.** ZF4 cells were cultured at 28°C for 5 or 30 days, then MeDIP-qPCR (A) and RT-qPCR (B) were performed to detect DNA methylation levels in promoter regions and mRNA levels of indicated genes. Frequency of DNA methylation and relative expression were carried out by the comparative threshold cycle (CT) method. Statistical analysis was performed using GraphPad Prism 5 software. The student t test was used on measurements from 3 experimental replicates. Error bars represent standard deviations (SD) ( $n = 3$ ). An asterisk represents significant difference compared to 28°C sample ( $P < 0.05$ ). \*\*:  $P < 0.01$ , \*\*\*:  $P < 0.001$ .  
(PDF)

**S1 Table. Primers for MeDIP-qPCR analysis.**  
(XLSX)

**S2 Table. Primers for RT-qPCR analysis.**

(XLSX)

**S3 Table. Primers for ChIP-qPCR analysis.**

(XLSX)

**S4 Table. DNA methylation variation in promoter regions after cold treatment (Fold >= 2 or <= 0.5, FDR<= 0.01).**

(XLSX)

**S5 Table. Enriched GO categories of DMRs after cold treatment (Fold >1.3, P<0.05, FDR<0.2).**

(XLSX)

## Acknowledgments

We thank Dr. Peng Hu for the technical assistance.

## Author Contributions

**Conceived and designed the experiments:** JZ.

**Performed the experiments:** BH WL QX JL YS XL XY JZ.

**Analyzed the data:** ZC JZ.

**Contributed reagents/materials/analysis tools:** JZ BH WL.

**Wrote the paper:** JZ BH ZC.

## References

1. Singer-Sam J, Riggs AD. X chromosome inactivation and DNA methylation. *Exs.* 1993; 64:358–84. PMID: [7678203](#).
2. Attwood JT, Yung RL, Richardson BC. DNA methylation and the regulation of gene transcription. *Cellular and molecular life sciences: CMLS.* 2002; 59(2):241–57. PMID: [11915942](#).
3. Secco D, Wang C, Shou H, Schultz MD, Chiarenza S, Nussaume L, et al. Stress induced gene expression drives transient DNA methylation changes at adjacent repetitive elements. *eLife.* 2015; 4. doi: [10.7554/eLife.09343](#) PMID: [26196146](#); PubMed Central PMCID: PMC4534844.
4. Dubin MJ, Zhang P, Meng D, Remigereau MS, Osborne EJ, Paolo Casale F, et al. DNA methylation in Arabidopsis has a genetic basis and shows evidence of local adaptation. *eLife.* 2015; 4:e05255. Epub 2015/05/06. doi: [10.7554/eLife.05255](#) PMID: [25939354](#); PubMed Central PMCID: PMC4413256.
5. Baranek M, Cechova J, Raddova J, Holleinova V, Ondrusikova E, Pidra M. Dynamics and Reversibility of the DNA Methylation Landscape of Grapevine Plants (*Vitis vinifera*) Stressed by In Vitro Cultivation and Thermotherapy. *Plos One.* 2015; 10(5):e0126638. doi: [10.1371/journal.pone.0126638](#) PMID: [25973746](#); PubMed Central PMCID: PMC4431845.
6. Feinberg AP, Irizarry RA. Stochastic epigenetic variation as a driving force of development, evolutionary adaptation, and disease. *Proceedings of the National Academy of Sciences of the United States of America.* 2010; 107:1757–64. doi: [10.1073/pnas.0906183107](#) PMID: [ISI:000273972500012](#).
7. Mifsud KR, Gutierrez-Mecinas M, Trollope AF, Collins A, Saunderson EA, Reul JM. Epigenetic mechanisms in stress and adaptation. *Brain Behav Immun.* 2011; 25(7):1305–15. doi: [10.1016/j.bbi.2011.06.005](#) PMID: [ISI:000295554300005](#).
8. Tittel-Elmer M, Bucher E, Broger L, Mathieu O, Paszkowski J, Vaillant I. Stress-Induced Activation of Heterochromatic Transcription. *Plos Genet.* 2010; 6(10). doi: ARTN e1001175 doi: [10.1371/journal.pgen.1001175](#) PMID: [ISI:000283647800007](#).
9. Pecinka A, Dinh HQ, Baubec T, Rosa M, Lettner N, Scheid OM. Epigenetic Regulation of Repetitive Elements Is Attenuated by Prolonged Heat Stress in Arabidopsis. *Plant Cell.* 2010; 22(9):3118–29. doi: [10.1105/tpc.110.078493](#) PMID: [ISI:000283579800018](#).



10. Johannes F, Porcher E, Teixeira FK, Saliba-Colombani V, Simon M, Agier N, et al. Assessing the impact of transgenerational epigenetic variation on complex traits. *Plos Genet.* 2009; 5(6):e1000530. Epub 2009/06/27. doi: [10.1371/journal.pgen.1000530](https://doi.org/10.1371/journal.pgen.1000530) PMID: [19557164](https://pubmed.ncbi.nlm.nih.gov/19557164/); PubMed Central PMCID: [PMC2696037](https://pubmed.ncbi.nlm.nih.gov/PMC2696037/).
11. Lopez-Olmeda JF, Sanchez-Vazquez FJ. Thermal biology of zebrafish (*Danio rerio*). *J Therm Biol.* 2011; 36(2):91–104. doi: [10.1016/j.jtherbio.2010.12.005](https://doi.org/10.1016/j.jtherbio.2010.12.005) PMID: [ISI:000288415300001](https://pubmed.ncbi.nlm.nih.gov/ISI:000288415300001/).
12. Chen L, DeVries AL, Cheng CH. Evolution of antifreeze glycoprotein gene from a trypsinogen gene in Antarctic notothenioid fish. *Proceedings of the National Academy of Sciences of the United States of America.* 1997; 94(8):3811–6. Epub 1997/04/15. PMID: [9108060](https://pubmed.ncbi.nlm.nih.gov/9108060/); PubMed Central PMCID: [PMC20523](https://pubmed.ncbi.nlm.nih.gov/PMC20523/).
13. Fields PA, Somero GN. Hot spots in cold adaptation: localized increases in conformational flexibility in lactate dehydrogenase A4 orthologs of Antarctic notothenioid fishes. *Proceedings of the National Academy of Sciences of the United States of America.* 1998; 95(19):11476–81. PMID: [9736762](https://pubmed.ncbi.nlm.nih.gov/9736762/); PubMed Central PMCID: [PMC21668](https://pubmed.ncbi.nlm.nih.gov/PMC21668/).
14. Detrich HW 3rd, Parker SK, Williams RC Jr, Nogales E, Downing KH. Cold adaptation of microtubule assembly and dynamics. Structural interpretation of primary sequence changes present in the alpha- and beta-tubulins of Antarctic fishes. *The Journal of biological chemistry.* 2000; 275(47):37038–47. doi: [10.1074/jbc.M005699200](https://doi.org/10.1074/jbc.M005699200) PMID: [10956651](https://pubmed.ncbi.nlm.nih.gov/10956651/).
15. Romisch K, Collie N, Soto N, Logue J, Lindsay M, Scheper W, et al. Protein translocation across the endoplasmic reticulum membrane in cold-adapted organisms. *Journal of cell science.* 2003; 116(Pt 14):2875–83. doi: [10.1242/jcs.00597](https://doi.org/10.1242/jcs.00597) PMID: [12771183](https://pubmed.ncbi.nlm.nih.gov/12771183/).
16. O'Brien KM, Sidell BD. The interplay among cardiac ultrastructure, metabolism and the expression of oxygen-binding proteins in Antarctic fishes. *J Exp Biol.* 2000; 203(Pt 8):1287–97. PMID: [10729278](https://pubmed.ncbi.nlm.nih.gov/10729278/).
17. Sidell BD, O'Brien KM. When bad things happen to good fish: the loss of hemoglobin and myoglobin expression in Antarctic icefishes. *J Exp Biol.* 2006; 209(Pt 10):1791–802. Epub 2006/05/03. doi: [10.1242/jeb.02091](https://doi.org/10.1242/jeb.02091) PMID: [16651546](https://pubmed.ncbi.nlm.nih.gov/16651546/).
18. Chen Z, Cheng CH, Zhang J, Cao L, Chen L, Zhou L, et al. Transcriptomic and genomic evolution under constant cold in Antarctic notothenioid fish. *Proceedings of the National Academy of Sciences of the United States of America.* 2008; 105(35):12944–9. doi: [10.1073/pnas.0802432105](https://doi.org/10.1073/pnas.0802432105) PMID: [18753634](https://pubmed.ncbi.nlm.nih.gov/18753634/); PubMed Central PMCID: [PMC2529033](https://pubmed.ncbi.nlm.nih.gov/PMC2529033/).
19. Long Y, Song G, Yan J, He X, Li Q, Cui Z. Transcriptomic characterization of cold acclimation in larval zebrafish. *BMC genomics.* 2013; 14:612. Epub 2013/09/13. doi: [10.1186/1471-2164-14-612](https://doi.org/10.1186/1471-2164-14-612) PMID: [24024969](https://pubmed.ncbi.nlm.nih.gov/24024969/); PubMed Central PMCID: [PMC3847098](https://pubmed.ncbi.nlm.nih.gov/PMC3847098/).
20. Long Y, Li L, Li Q, He X, Cui Z. Transcriptomic characterization of temperature stress responses in larval zebrafish. *Plos One.* 2012; 7(5):e37209. Epub 2012/06/06. doi: [10.1371/journal.pone.0037209](https://doi.org/10.1371/journal.pone.0037209) PMID: [22666345](https://pubmed.ncbi.nlm.nih.gov/22666345/); PubMed Central PMCID: [PMC3364249](https://pubmed.ncbi.nlm.nih.gov/PMC3364249/).
21. Potok ME, Nix DA, Pamell TJ, Cairns BR. Reprogramming the Maternal Zebrafish Genome after Fertilization to Match the Paternal Methylation Pattern. *Cell.* 2013; 153(4):759–72. doi: [10.1016/j.cell.2013.04.030](https://doi.org/10.1016/j.cell.2013.04.030) PMID: [ISI:000318844000007](https://pubmed.ncbi.nlm.nih.gov/ISI:000318844000007/).
22. Jiang L, Zhang J, Wang JJ, Wang L, Zhang L, Li G, et al. Sperm, but not oocyte, DNA methylome is inherited by zebrafish early embryos. *Cell.* 2013; 153(4):773–84. Epub 2013/05/15. doi: [10.1016/j.cell.2013.04.041](https://doi.org/10.1016/j.cell.2013.04.041) PMID: [23663777](https://pubmed.ncbi.nlm.nih.gov/23663777/); PubMed Central PMCID: [PMC4081501](https://pubmed.ncbi.nlm.nih.gov/PMC4081501/).
23. Mhanni AA, McGowan RA. Global changes in genomic methylation levels during early development of the zebrafish embryo. *Dev Genes Evol.* 2004; 214(8):412–7. doi: [10.1007/s00427-004-0418-0](https://doi.org/10.1007/s00427-004-0418-0) PMID: [ISI:000223264100005](https://pubmed.ncbi.nlm.nih.gov/ISI:000223264100005/).
24. Andersen IS, Reiner AH, Aanes H, Alestrom P, Collas P. Developmental features of DNA methylation during activation of the embryonic zebrafish genome. *Genome Biol.* 2012; 13(7). doi: [Artn R65 doi: 10.1186/Gb-2012-13-7-R65](https://doi.org/10.1186/Gb-2012-13-7-R65) PMID: [ISI:000315186500009](https://pubmed.ncbi.nlm.nih.gov/ISI:000315186500009/).
25. Chatterjee A, Ozaki Y, Stockwell PA, Horsfield JA, Morison IM, Nakagawa S. Mapping the zebrafish brain methylome using reduced representation bisulfite sequencing. *Epigenetics-U.S.* 2013; 8(9):979–89. PMID: [ISI:000327624600012](https://pubmed.ncbi.nlm.nih.gov/ISI:000327624600012/).
26. Langmead B, Salzberg SL. Fast gapped-read alignment with Bowtie 2. *Nature methods.* 2012; 9(4):357–9. doi: [10.1038/nmeth.1923](https://doi.org/10.1038/nmeth.1923) PMID: [22388286](https://pubmed.ncbi.nlm.nih.gov/22388286/); PubMed Central PMCID: [PMC3322381](https://pubmed.ncbi.nlm.nih.gov/PMC3322381/).
27. Kanehisa M, Araki M, Goto S, Hattori M, Hirakawa M, Itoh M, et al. KEGG for linking genomes to life and the environment. *Nucleic acids research.* 2008; 36(Database issue):D480–4. doi: [10.1093/nar/gkm882](https://doi.org/10.1093/nar/gkm882) PMID: [18077471](https://pubmed.ncbi.nlm.nih.gov/18077471/); PubMed Central PMCID: [PMC2238879](https://pubmed.ncbi.nlm.nih.gov/PMC2238879/).
28. Moriya Y, Itoh M, Okuda S, Yoshizawa AC, Kanehisa M. KAAS: an automatic genome annotation and pathway reconstruction server. *Nucleic acids research.* 2007; 35(Web Server issue):W182–5. doi: [10.1093/nar/gkm321](https://doi.org/10.1093/nar/gkm321) PMID: [17526522](https://pubmed.ncbi.nlm.nih.gov/17526522/); PubMed Central PMCID: [PMC1933193](https://pubmed.ncbi.nlm.nih.gov/PMC1933193/).

29. Wilcoxon F. Probability tables for individual comparisons by ranking methods. *Biometrics*. 1947; 3(3):119–22. PMID: [18903631](#).
30. Quinlan AR. BEDTools: The Swiss-Army Tool for Genome Feature Analysis. *Current protocols in bioinformatics / editorial board, Baxevanis Andreas D [et al]*. 2014; 47:11 2 1–2 34. Epub 2014/09/10. doi: [10.1002/0471250953.bi1112s47](#) PMID: [25199790](#); PubMed Central PMCID: PMC4213956.
31. Zhang J, Markus J, Bies J, Paul T, Wolff L. Three murine leukemia virus integration regions within 100 kilobases upstream of c-myc are proximal to the 5' regulatory region of the gene through DNA looping. *Journal of virology*. 2012; 86(19):10524–32. Epub 2012/07/20. doi: [10.1128/JVI.01077-12](#) PMID: [22811527](#); PubMed Central PMCID: PMC3457256.
32. Zhang Y, Liu T, Meyer CA, Eeckhoute J, Johnson DS, Bernstein BE, et al. Model-based analysis of ChIP-Seq (MACS). *Genome biology*. 2008; 9(9):R137. Epub 2008/09/19. doi: [10.1186/gb-2008-9-9-r137](#) PMID: [18798982](#); PubMed Central PMCID: PMC2592715.
33. Wilcoxon F. Individual Comparisons by Ranking Methods. *Biometrics Bulletin*. 1945; 1(6):4. doi: [10.2307/3001968](#)
34. Crider KS, Yang TP, Berry RJ, Bailey LB. Folate and DNA methylation: a review of molecular mechanisms and the evidence for folate's role. *Advances in nutrition*. 2012; 3(1):21–38. doi: [10.3945/an.111.000992](#) PMID: [22332098](#); PubMed Central PMCID: PMC3262611.
35. Kim TH, Barrera LO, Zheng M, Qu C, Singer MA, Richmond TA, et al. A high-resolution map of active promoters in the human genome. *Nature*. 2005; 436(7052):876–80. Epub 2005/07/01. doi: [10.1038/nature03877](#) PMID: [15988478](#); PubMed Central PMCID: PMC1895599.
36. Yu G, Wang LG, He QY. ChIPseeker: an R/Bioconductor package for ChIP peak annotation, comparison and visualization. *Bioinformatics*. 2015; 31(14):2382–3. Epub 2015/03/15. doi: [10.1093/bioinformatics/btv145](#) PMID: [25765347](#).
37. Ricardi MM, Gonzalez RM, Zhong S, Dominguez PG, Duffy T, Turjanski PG, et al. Genome-wide data (ChIP-seq) enabled identification of cell wall-related and aquaporin genes as targets of tomato ASR1, a drought stress-responsive transcription factor. *BMC plant biology*. 2014; 14:29. Epub 2014/01/16. doi: [10.1186/1471-2229-14-29](#) PMID: [24423251](#); PubMed Central PMCID: PMC3923394.
38. Feng SH, Cokus SJ, Zhang XY, Chen PY, Bostick M, Goll MG, et al. Conservation and divergence of methylation patterning in plants and animals. *Proceedings of the National Academy of Sciences of the United States of America*. 2010; 107(19):8689–94. doi: [10.1073/pnas.1002720107](#) PMID: [ISI:000277591200037](#).
39. Zemach A, McDaniel IE, Silva P, Zilberman D. Genome-wide evolutionary analysis of eukaryotic DNA methylation. *Science*. 2010; 328(5980):916–9. Epub 2010/04/17. doi: [10.1126/science.1186366](#) PMID: [20395474](#).
40. Flores KB, Wolschin F, Amdam GV. The role of methylation of DNA in environmental adaptation. *Integrative and comparative biology*. 2013; 53(2):359–72. doi: [10.1093/icb/ict019](#) PMID: [23620251](#); PubMed Central PMCID: PMC3710460.
41. Finnegan EJ, Genger RK, Kovac K, Peacock WJ, Dennis ES. DNA methylation and the promotion of flowering by vernalization. *Proceedings of the National Academy of Sciences of the United States of America*. 1998; 95(10):5824–9. PMID: [9576969](#); PubMed Central PMCID: PMC20464.
42. Rakei A, Maali-Amiri R, Zeinali H, Ranjbar M. DNA methylation and physio-biochemical analysis of chickpea in response to cold stress. *Protoplasma*. 2015. doi: [10.1007/s00709-015-0788-3](#) PMID: [25820678](#).
43. Steward N, Kusano T, Sano H. Expression of ZmMET1, a gene encoding a DNA methyltransferase from maize, is associated not only with DNA replication in actively proliferating cells, but also with altered DNA methylation status in cold-stressed quiescent cells. *Nucleic acids research*. 2000; 28(17):3250–9. PMID: [10954592](#); PubMed Central PMCID: PMC110715.
44. Vergauwen L, Knäpen D, Hagenaaers A, De Boeck G, Blust R. Assessing the impact of thermal acclimation on physiological condition in the zebrafish model. *Journal of comparative physiology B, Biochemical, systemic, and environmental physiology*. 2013; 183(1):109–21. doi: [10.1007/s00360-012-0691-6](#) PMID: [22872185](#).
45. Imamura S, Ojima N, Yamashita M. Cold-inducible expression of the cell division cycle gene CDC48 and its promotion of cell proliferation during cold acclimation in zebrafish cells. *FEBS letters*. 2003; 549(1–3):14–20. PMID: [12914916](#).
46. Kulkeaw K, Ishitani T, Kanemaru T, Fucharoen S, Sugiyama D. Cold exposure down-regulates zebrafish hematopoiesis. *Biochem Biophys Res Commun*. 2010; 394(4):859–64. doi: [10.1016/j.bbrc.2010.01.047](#) PMID: [ISI:000276986400001](#).
47. McKay JA, Groom A, Potter C, Coneyworth LJ, Ford D, Mathers JC, et al. Genetic and non-genetic influences during pregnancy on infant global and site specific DNA methylation: role for folate gene

- variants and vitamin B12. *Plos One*. 2012; 7(3):e33290. doi: [10.1371/journal.pone.0033290](https://doi.org/10.1371/journal.pone.0033290) PMID: [22479380](https://pubmed.ncbi.nlm.nih.gov/22479380/); PubMed Central PMCID: PMC3316565.
48. Ulrich CM, Reed MC, Nijhout HF. Modeling folate, one-carbon metabolism, and DNA methylation. *Nutrition reviews*. 2008; 66 Suppl 1:S27–30. doi: [10.1111/j.1753-4887.2008.00062.x](https://doi.org/10.1111/j.1753-4887.2008.00062.x) PMID: [18673484](https://pubmed.ncbi.nlm.nih.gov/18673484/).
  49. Stanger O, Wonisch W. Enzymatic and non-enzymatic antioxidative effects of folic acid and its reduced derivatives. *Sub-cellular biochemistry*. 2012; 56:131–61. Epub 2011/11/26. doi: [10.1007/978-94-007-2199-9\\_8](https://doi.org/10.1007/978-94-007-2199-9_8) PMID: [22116698](https://pubmed.ncbi.nlm.nih.gov/22116698/).
  50. Joshi R, Adhikari S, Patro BS, Chattopadhyay S, Mukherjee T. Free radical scavenging behavior of folic acid: evidence for possible antioxidant activity. *Free radical biology & medicine*. 2001; 30(12):1390–9. Epub 2001/06/08. PMID: [11390184](https://pubmed.ncbi.nlm.nih.gov/11390184/).
  51. Sahin K, Onderci M, Sahin N, Gursu MF, Aydin S. Cold-induced elevation of homocysteine and lipid peroxidation can be alleviated by dietary folic acid supplementation. *Nutr Res*. 2003; 23(3):357–65. doi: [10.1016/S0271-5317\(02\)00539-0](https://doi.org/10.1016/S0271-5317(02)00539-0) PMID: [ISI:000182230100008](https://pubmed.ncbi.nlm.nih.gov/12100008/).
  52. Howard TD, Mathias RA, Seeds MC, Herrington DM, Hixson JE, Shimmin LC, et al. DNA methylation in an enhancer region of the FADS cluster is associated with FADS activity in human liver. *Plos One*. 2014; 9(5):e97510. doi: [10.1371/journal.pone.0097510](https://doi.org/10.1371/journal.pone.0097510) PMID: [24842322](https://pubmed.ncbi.nlm.nih.gov/24842322/); PubMed Central PMCID: PMC4026313.
  53. Mukhopadhyay R, Yu W, Whitehead J, Xu J, Lezcano M, Pack S, et al. The binding sites for the chromatin insulator protein CTCF map to DNA methylation-free domains genome-wide. *Genome research*. 2004; 14(8):1594–602. doi: [10.1101/gr.2408304](https://doi.org/10.1101/gr.2408304) PMID: [15256511](https://pubmed.ncbi.nlm.nih.gov/15256511/); PubMed Central PMCID: PMC509268.
  54. Leonova KI, Brodsky L, Lipchick B, Pal M, Novototskaya L, Chenchik AA, et al. p53 cooperates with DNA methylation and a suicidal interferon response to maintain epigenetic silencing of repeats and noncoding RNAs. *Proceedings of the National Academy of Sciences of the United States of America*. 2013; 110(1):E89–98. doi: [10.1073/pnas.1216922110](https://doi.org/10.1073/pnas.1216922110) PMID: [23236145](https://pubmed.ncbi.nlm.nih.gov/23236145/); PubMed Central PMCID: PMC3538199.
