# Supplementary material for: Variation of DNA Methylome of Zebrafish Cells under Cold Pressure
Source: PubMed Central journal article supplement (PMC4975392; doi:10.1371/journal.pone.0160358), 2016-08-05
Supplement: pone.0160358.s002.pdf [file pone.0160358.s002.pdf]

**A**

**Chr. 21: 25996382- 25997240**  
 (CGI: ~ 9kb upstream of *esrra* gene)

Igv image created from MeDIP-seq data

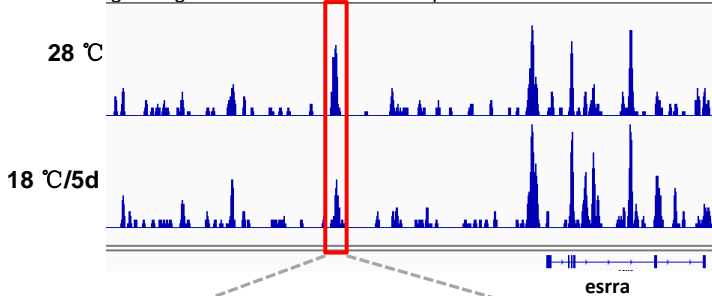

**BSP analysis of the locus**

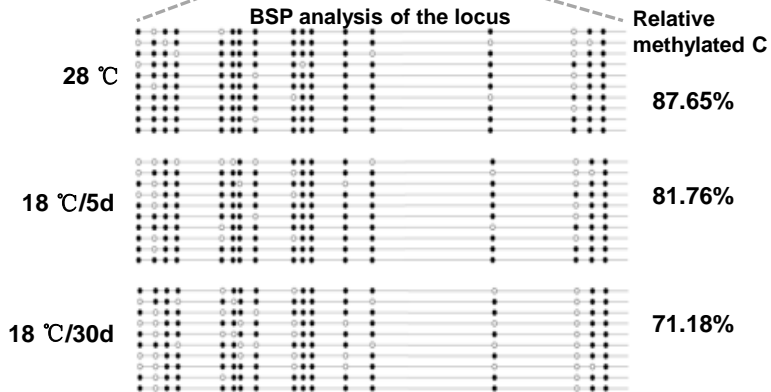**B**

**Chr.19: 10406775-10407187**  
 (CGI: ~ 2.3 kb upstream of *cacng6a* gene)

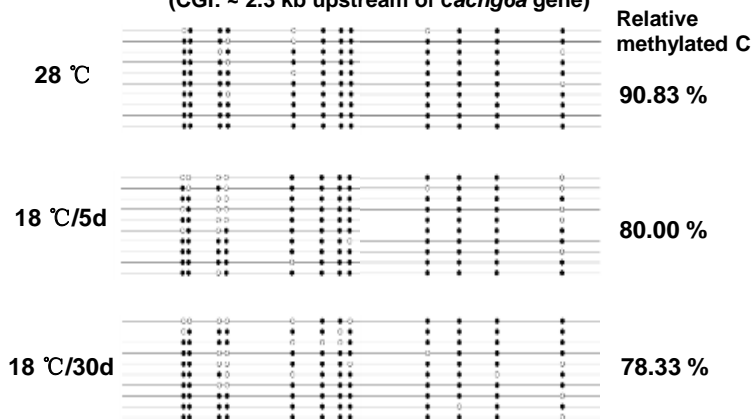

**BSP analysis of the locus**
