# Supplementary material for: Variation of DNA Methylome of Zebrafish Cells under Cold Pressure
Source: PubMed Central journal article supplement (PMC4975392; doi:10.1371/journal.pone.0160358), 2016-08-05

### MeDIP-qPCR

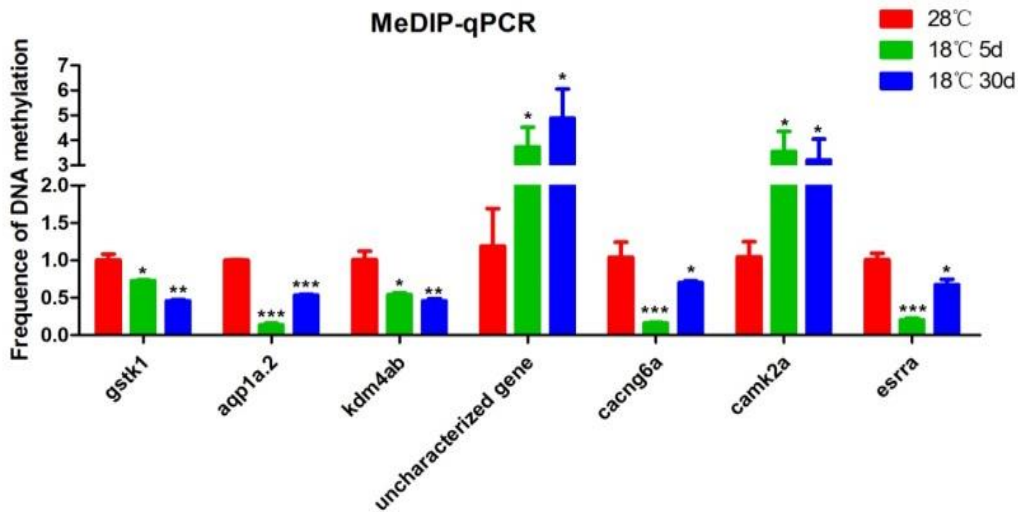

Supplement: pone.0160358.s003.pdf [file pone.0160358.s003.pdf]
