# Supplementary material for: Variation of DNA Methylome of Zebrafish Cells under Cold Pressure
Source: PLoS One. 2016 Aug 5;11(8):e0160358. doi: 10.1371/journal.pone.0160358 (PMC4975392; doi:10.1371/journal.pone.0160358)
Supplement: S1 Table — (XLSX) [file pone.0160358.s006.xlsx]

## Sheet: Sheet1
S1 Table. Primers for MeDIP-qPCR analysis.
Gene name	Forward primer(5'-3')	Reverse primer(5'-3')
p53	AATGTAGCCGCCTTTCTTTC	AGCTACCTTGTCACCCACCT
atp5j	CGAACTTCAGAATCTTGCCA	TACGTGCGAATTCCATTCAT
epb41b	TCTTTCTCTCGCGTTTGCTA	AATGCTGTCATTGGTCAAGC
trpm4c(trpm4b.2)	TCCTTTCGCAGCTTTACATTTG	TGATCTTAACCCAACCGTGAG
camk2a	TTCGAATCGTCAGGCAGAAG	TCCCCTCGTTTCACTTTTCC
aqp1a.2	AAATTAGGACGAGGCAGTGG	CTTTAAAGCCTGACCTGACG
cacng6a	AGCTCTGACGTGCGTGTCT	GGTTGACCATGCCTACGAGT
gstk1	TGTGTGAATGAGAGCGTGTG	ACCACCAACTATTTCGGCAT
kdm4ab	CTGACTCGATTCGACCTTCA	CGAGGATGAATTCACTGGAA
selenbp1	AGGAGCAAGAGGATACGGAA	GAATGTGAGAAATCGGTGGA
gch1	GACTTACAGCACACGTCTAGG	ACTTCCAGCTTTCCATCCG
gch2	AAGATGAACAGCCGTACCG	CACTGATGGACTTAAGGGATGG
