# Supplementary material for: Variation of DNA Methylome of Zebrafish Cells under Cold Pressure
Source: PLoS One. 2016 Aug 5;11(8):e0160358. doi: 10.1371/journal.pone.0160358 (PMC4975392; doi:10.1371/journal.pone.0160358)
Supplement: S4 Table — (XLSX) [file pone.0160358.s009.xlsx]

## Sheet: Sheet1
S4 Table. DNA methylation variation in promoter regions under cold treatment (Fold >=2 or <=0.5, FDR<=0.01)
Peak Location	Length	RPMRatio_18°C /5d vs 28°C	P-value_18°C /5d vs 28°C	RPMRatio_18°C /30d vs 28°C	P-value_18°C /30d vs 28°C	FDR_18°C /5d vs 28°C	FDR_18°C /30d vs 28°C	Mark_18°C /5d vs 28°C	Mark_18°C /30d vs 28°C	CpG	GenomicRegion	TranscriptID	TranscriptDes	GeneID
12_50256299_50257340	1042	0.051	0	0.051	0	0	0	down	down		Promoter	ENSDART00000023547	annexin A11b [Source:ZFIN;Acc:ZDB-GENE-030707-5]	ENSDARG00000002632
7_4470480_4471162	683	0.052	0	0.052	0	0	0	down	down		Promoter	ENSDART00000128855	Uncharacterized protein [Source:UniProtKB/TrEMBL;Acc:E7F5I8]	ENSDARG00000086654
6_39037482_39038295	814	0.059	0	0.059	0	0	0	down	down		Promoter	ENSDART00000104096	wu:fk80d04 [Source:ZFIN;Acc:ZDB-GENE-030131-7092]	ENSDARG00000070710
18_10286071_10287006	936	0.072	0	0.072	0	0	0	down	down		Promoter	ENSDART00000014496	microtubule associated monooxygenase, calponin and LIM domain containing 3a [Source:ZFIN;Acc:ZDB-GENE-050126-2]	ENSDARG00000021979
6_15813029_15813919	891	0.076	0	0.076	0	0	0	down	down		Promoter	ENSDART00000114638	Uncharacterized protein [Source:UniProtKB/TrEMBL;Acc:F1Q7A6]	ENSDARG00000052319
15_20813439_20814746	1308	0.078	0	0.078	0	0	0	down	down		Promoter	ENSDART00000079399	layilin [Source:HGNC Symbol;Acc:29471]	ENSDARG00000056835
18_20603579_20603859	281	0.078	0	0.078	0	0	0	down	down		Promoter	ENSDART00000100743	cortactin binding protein 2 [Source:ZFIN;Acc:ZDB-GENE-030131-8134]	ENSDARG00000040991
1_59183757_59184858	1102	0.08	0	0.08	0	0	0	down	down		Promoter	ENSDART00000073833	zinc finger protein 507 [Source:HGNC Symbol;Acc:23783]	ENSDARG00000096553
12_50328082_50328905	824	0.09	0	0.09	0	0	0	down	down		Promoter	ENSDART00000109315	Uncharacterized protein [Source:UniProtKB/TrEMBL;Acc:E7EZI7]	ENSDARG00000075408
20_14031319_14032386	1068	0.09	0	0.09	0	0	0	down	down		Promoter	ENSDART00000104032	si:ch211-223m11.2 [Source:ZFIN;Acc:ZDB-GENE-040724-123]	ENSDARG00000017188
3_15048493_15049467	975	0.09	0	0.09	0	0	0	down	down		Promoter	ENSDART00000104361	si:dkey-56d12.4 [Source:ZFIN;Acc:ZDB-GENE-060531-147]	ENSDARG00000070845
1_18684250_18684611	362	0.092	0	0.092	0	0	0	down	down		Promoter	ENSDART00000088750	amyloid beta (A4) precursor protein-binding, family B, member 2b [Source:ZFIN;Acc:ZDB-GENE-090313-73]	ENSDARG00000061880
20_14596513_14597463	951	0.092	0	0.092	0	0	0	down	down		Promoter	ENSDART00000063857	secernin 2 [Source:ZFIN;Acc:ZDB-GENE-040724-75]	ENSDARG00000043497
4_46734916_46736047	1132	0.092	0	0.092	0	0	0	down	down		Promoter	ENSDART00000143586	si:rp71-5o12.3 [Source:ZFIN;Acc:ZDB-GENE-070424-283]	ENSDARG00000075763
11_12636892_12637575	684	0.099	0	0.099	0	0	0	down	down		Promoter	ENSDART00000126698
23_34314925_34315387	463	0.099	0	0.099	0	0	0	down	down		Promoter	ENSDART00000132668	interleukin 17 receptor D [Source:HGNC Symbol;Acc:17616]	ENSDARG00000089004
6_30874616_30875558	943	0.099	0	0.099	0	0	0	down	down		Promoter	ENSDART00000028612	phosphodiesterase 4B, cAMP-specific a [Source:ZFIN;Acc:ZDB-GENE-030131-9570]	ENSDARG00000032868
14_18466122_18466839	718	0.102	0	0.102	0	0	0	down	down		Promoter	ENSDART00000080527	si:dkey-27i16.3 [Source:ZFIN;Acc:ZDB-GENE-091204-115]	ENSDARG00000057773
16_35857619_35859129	1511	0.102	0	0.102	0	0	0	down	down		Promoter	ENSDART00000144119
19_32891106_32891732	627	0.102	0	0.102	0	0	0	down	down		Promoter	ENSDART00000088427	family with sequence similarity 65, member B [Source:ZFIN;Acc:ZDB-GENE-060503-342]	ENSDARG00000061752
15_43062976_43063656	681	0.106	0	0.106	0	0	0	down	down		Promoter	ENSDART00000131154	Uncharacterized protein [Source:UniProtKB/TrEMBL;Acc:E7F7J3]	ENSDARG00000086864
16_40800178_40800653	476	0.106	0	0.106	0	0	0	down	down		Promoter	ENSDART00000131694	selenium binding protein 1 [Source:ZFIN;Acc:ZDB-GENE-040426-1436]	ENSDARG00000024717
21_37701857_37702494	638	0.106	0	0.106	0	0	0	down	down		Promoter	ENSDART00000113316	HEAT repeat containing 6 [Source:HGNC Symbol;Acc:24076]	ENSDARG00000073686
6_58196040_58196793	754	0.106	0	0.106	0	0	0	down	down		Promoter	ENSDART00000130978	Ral GTPase activating protein, beta subunit (non-catalytic) [Source:HGNC Symbol;Acc:29221]	ENSDARG00000088899
1_27564740_27565147	408	0.11	1e-06	0.11	1e-06	3.60083e-05	5.13631e-05	down	down		Promoter	ENSDART00000121758	endothelin receptor B1a [Source:ZFIN;Acc:ZDB-GENE-980526-16]	ENSDARG00000089334
17_2613146_2613755	610	0.114	1e-06	0.114	1e-06	3.60083e-05	5.13631e-05	down	down		Promoter	ENSDART00000024027	bradykinin receptor B1 [Source:ZFIN;Acc:ZDB-GENE-030814-1]	ENSDARG00000020744
6_54666087_54666978	892	0.114	1e-06	0.114	1e-06	3.60083e-05	5.13631e-05	down	down		Promoter	ENSDART00000074605	plakophilin 1b [Source:ZFIN;Acc:ZDB-GENE-030131-417]	ENSDARG00000052705
8_35268156_35269001	846	0.114	1e-06	0.114	1e-06	3.60083e-05	5.13631e-05	down	down		Promoter	ENSDART00000144924	zgc:77614 [Source:ZFIN;Acc:ZDB-GENE-040426-1844]	ENSDARG00000094032
14_49279580_49280631	1052	0.118	2e-06	0.118	3e-06	6.10614e-05	0.000119495	down	down		Promoter	ENSDART00000126889	cyclin A2 [Source:HGNC Symbol;Acc:1578]	ENSDARG00000089988
15_41649831_41651715	1885	0.118	2e-06	0.118	3e-06	6.10614e-05	0.000119495	down	down		Promoter	ENSDART00000144567	solute carrier family 8 (sodium-calcium exchanger), member 2b [Source:ZFIN;Acc:ZDB-GENE-050419-209]	ENSDARG00000040625
16_43005605_43006705	1101	0.118	2e-06	0.118	3e-06	6.10614e-05	0.000119495	down	down		Promoter	ENSDART00000102571	methyltransferase like 6 [Source:ZFIN;Acc:ZDB-GENE-040426-926]	ENSDARG00000070085
19_44673450_44673824	375	0.118	2e-06	0.118	3e-06	6.10614e-05	0.000119495	down	down		Promoter	ENSDART00000149278
20_32085618_32085940	323	0.118	2e-06	0.118	3e-06	6.10614e-05	0.000119495	down	down		Promoter	ENSDART00000034248	RAB32a, member RAS oncogene family [Source:ZFIN;Acc:ZDB-GENE-031006-10]	ENSDARG00000029036
22_2467417_2468106	690	0.118	2e-06	0.118	3e-06	6.10614e-05	0.000119495	down	down		Promoter	ENSDART00000146168	si:ch73-138e16.5 [Source:ZFIN;Acc:ZDB-GENE-070705-204]	ENSDARG00000095691
6_6427797_6428279	483	0.118	2e-06	0.118	3e-06	6.10614e-05	0.000119495	down	down		Promoter	ENSDART00000129520
1_45335294_45335968	675	0.123	5e-06	0.123	5e-06	0.000127957	0.000184383	down	down		Promoter	ENSDART00000136419	T-cell, immune regulator 1, ATPase, H+ transporting, lysosomal V0 subunit A3 [Source:ZFIN;Acc:ZDB-GENE-090311-31]	ENSDARG00000095971
11_7078572_7078867	296	0.123	5e-06	0.123	5e-06	0.000127957	0.000184383	down	down		Promoter	ENSDART00000102493	zgc:173548 [Source:ZFIN;Acc:ZDB-GENE-070928-39]	ENSDARG00000070048
14_12564471_12565183	713	0.123	5e-06	0.123	5e-06	0.000127957	0.000184383	down	down		Promoter	ENSDART00000123377	Uncharacterized protein [Source:UniProtKB/TrEMBL;Acc:E7F045]	ENSDARG00000088113
18_34478344_34478750	407	0.123	5e-06	0.123	5e-06	0.000127957	0.000184383	down	down		Promoter	ENSDART00000059344	beta-1,3-glucuronyltransferase 1 (glucuronosyltransferase P) [Source:ZFIN;Acc:ZDB-GENE-050419-21]	ENSDARG00000040547
18_36709022_36709821	800	0.123	5e-06	0.123	5e-06	0.000127957	0.000184383	down	down		Promoter	ENSDART00000098889	cell cycle associated protein 1b [Source:ZFIN;Acc:ZDB-GENE-040426-2020]	ENSDARG00000054272
23_2675721_2676370	650	0.123	5e-06	0.123	5e-06	0.000127957	0.000184383	down	down		Promoter	ENSDART00000108716	Uncharacterized protein [Source:UniProtKB/TrEMBL;Acc:E7F077]	ENSDARG00000078231
3_13706914_13707495	582	0.123	5e-06	0.123	5e-06	0.000127957	0.000184383	down	down		Promoter	ENSDART00000127395	transmembrane protein 56b [Source:ZFIN;Acc:ZDB-GENE-041010-90]	ENSDARG00000043595
6_33781710_33782378	669	0.123	5e-06	0.123	5e-06	0.000127957	0.000184383	down	down		Promoter	ENSDART00000111020	Uncharacterized protein [Source:UniProtKB/TrEMBL;Acc:E7F4I5]	ENSDARG00000073768
6_39015169_39015567	399	0.123	5e-06	0.123	5e-06	0.000127957	0.000184383	down	down		Promoter	ENSDART00000004240	zgc:162180 [Source:ZFIN;Acc:ZDB-GENE-070424-25]	ENSDARG00000070713
12_32293876_32294459	584	0.129	9e-06	0.129	9e-06	0.00019257	0.000259948	down	down		Promoter	ENSDART00000153004
13_41108073_41108587	515	0.129	9e-06	0.129	9e-06	0.00019257	0.000259948	down	down		Promoter	ENSDART00000112646	cyclin M1 [Source:ZFIN;Acc:ZDB-GENE-090312-51]	ENSDARG00000078087
13_8770361_8771176	816	0.129	9e-06	0.129	9e-06	0.00019257	0.000259948	down	down		Promoter	ENSDART00000091502	coiled-coil domain containing 176 [Source:HGNC Symbol;Acc:19855]	ENSDARG00000062924
14_34850586_34851015	430	0.129	9e-06	0.129	9e-06	0.00019257	0.000259948	down	down		Promoter	ENSDART00000116231
18_30511180_30512536	1357	0.129	9e-06	0.129	9e-06	0.00019257	0.000259948	down	down		Promoter	ENSDART00000078894	interferon regulatory factor 8 [Source:ZFIN;Acc:ZDB-GENE-040718-367]	ENSDARG00000056407
2_3261760_3262570	811	0.129	9e-06	0.129	9e-06	0.00019257	0.000259948	down	down		Promoter	ENSDART00000118437
20_36256776_36257459	684	0.129	9e-06	0.129	9e-06	0.00019257	0.000259948	down	down		Promoter	ENSDART00000131867	cornichon homolog 3 (Drosophila) [Source:ZFIN;Acc:ZDB-GENE-041001-180]	ENSDARG00000014953
21_10287874_10288592	719	0.129	9e-06	0.129	9e-06	0.00019257	0.000259948	down	down		Promoter	ENSDART00000148898
22_1585131_1585796	666	0.129	9e-06	0.129	9e-06	0.00019257	0.000259948	down	down		Promoter	ENSDART00000143687	zgc:174224 [Source:ZFIN;Acc:ZDB-GENE-071004-118]	ENSDARG00000093875
23_6125124_6126040	917	0.129	9e-06	0.129	9e-06	0.00019257	0.000259948	down	down		Promoter	ENSDART00000081714	myosin binding protein Ha [Source:ZFIN;Acc:ZDB-GENE-040426-1531]	ENSDARG00000058799
25_1650330_1650676	347	0.129	9e-06	0.129	9e-06	0.00019257	0.000259948	down	down	Y	Promoter	ENSDART00000093277	protein phosphatase, Mg2+/Mn2+ dependent, 1H [Source:ZFIN;Acc:ZDB-GENE-061027-190]	ENSDARG00000063684
5_22231938_22232680	743	0.129	9e-06	0.129	9e-06	0.00019257	0.000259948	down	down		Promoter	ENSDART00000051607	iron-sulfur cluster scaffold homolog (E. coli) [Source:HGNC Symbol;Acc:29882]	ENSDARG00000035596
6_10780767_10781478	712	0.129	9e-06	0.129	9e-06	0.00019257	0.000259948	down	down		Promoter	ENSDART00000041858	metaxin 2 [Source:ZFIN;Acc:ZDB-GENE-021210-2]	ENSDARG00000029415
6_30152977_30153955	979	0.129	9e-06	0.129	9e-06	0.00019257	0.000259948	down	down		Promoter	ENSDART00000121492	Uncharacterized protein [Source:UniProtKB/TrEMBL;Acc:E7FDA9]	ENSDARG00000087805
6_42940782_42941336	555	0.129	9e-06	0.129	9e-06	0.00019257	0.000259948	down	down		Promoter	ENSDART00000124623	Uncharacterized protein [Source:UniProtKB/TrEMBL;Acc:E7F5J4]	ENSDARG00000087225
6_43854581_43855022	442	0.129	9e-06	0.129	9e-06	0.00019257	0.000259948	down	down		Promoter	ENSDART00000123341	prokineticin 2 [Source:ZFIN;Acc:ZDB-GENE-100726-1]	ENSDARG00000091616
7_16635213_16636078	866	0.129	9e-06	0.129	9e-06	0.00019257	0.000259948	down	down		Promoter	ENSDART00000144765	paired box gene 6b [Source:ZFIN;Acc:ZDB-GENE-001031-1]	ENSDARG00000045936
8_55081264_55081643	380	0.129	9e-06	0.129	9e-06	0.00019257	0.000259948	down	down		Promoter	ENSDART00000150850	FK506 binding protein 15, 133kDa [Source:HGNC Symbol;Acc:23397]	ENSDARG00000087089
9_41585371_41586626	1256	0.129	9e-06	0.129	9e-06	0.00019257	0.000259948	down	down		Promoter	ENSDART00000123669
1_47928843_47929314	472	0.135	1.7e-05	0.135	1.8e-05	0.000301041	0.000401124	down	down		Promoter	ENSDART00000101104	connexin 41.8 [Source:ZFIN;Acc:ZDB-GENE-050616-11]	ENSDARG00000069450
13_11096309_11097129	821	0.135	1.7e-05	0.135	1.8e-05	0.000301041	0.000401124	down	down		Promoter	ENSDART00000139529
14_23151841_23152287	447	0.135	1.7e-05	0.135	1.8e-05	0.000301041	0.000401124	down	down		Promoter	ENSDART00000082697	gamma-aminobutyric acid (GABA) A receptor, alpha 6a [Source:ZFIN;Acc:ZDB-GENE-040426-1692]	ENSDARG00000075058
14_52099417_52099949	533	0.135	1.7e-05	0.135	1.8e-05	0.000301041	0.000401124	down	down		Promoter	ENSDART00000121723	unc-5 homolog A (C. elegans) [Source:ZFIN;Acc:ZDB-GENE-080219-19]	ENSDARG00000074543
14_52361742_52362931	1190	0.135	1.7e-05	0.135	1.8e-05	0.000301041	0.000401124	down	down		Promoter	ENSDART00000116712
16_19619962_19620829	868	0.135	1.7e-05	0.135	1.8e-05	0.000301041	0.000401124	down	down		Promoter	ENSDART00000137215	caspase 2, apoptosis-related cysteine protease [Source:ZFIN;Acc:ZDB-GENE-030825-3]	ENSDARG00000062052
18_37852142_37852646	505	0.135	1.7e-05	0.135	1.8e-05	0.000301041	0.000401124	down	down		Promoter	ENSDART00000127955	LysM, putative peptidoglycan-binding, domain containing 2 [Source:ZFIN;Acc:ZDB-GENE-040801-250]	ENSDARG00000091771
2_32313420_32314217	798	0.135	1.7e-05	0.135	1.8e-05	0.000301041	0.000401124	down	down		Promoter	ENSDART00000134125	Fas-activated serine/threonine kinase [Source:ZFIN;Acc:ZDB-GENE-070912-680]	ENSDARG00000077075
20_35084893_35085635	743	0.135	1.7e-05	0.135	1.8e-05	0.000301041	0.000401124	down	down		Promoter	ENSDART00000006954
21_2557394_2558528	1135	0.135	1.7e-05	0.135	1.8e-05	0.000301041	0.000401124	down	down		Promoter	ENSDART00000124330	zgc:193790 [Source:ZFIN;Acc:ZDB-GENE-080723-55]	ENSDARG00000075084
21_869598_870057	460	0.135	1.7e-05	0.135	1.8e-05	0.000301041	0.000401124	down	down		Promoter	ENSDART00000082377		ENSDARG00000063362
22_42009546_42011055	1510	0.135	1.7e-05	0.135	1.8e-05	0.000301041	0.000401124	down	down		Promoter	ENSDART00000149541
25_22384423_22384782	360	0.135	1.7e-05	0.135	1.8e-05	0.000301041	0.000401124	down	down		Promoter	ENSDART00000121878	zinc finger protein 277 [Source:ZFIN;Acc:ZDB-GENE-040426-1633]	ENSDARG00000025346
4_58656687_58657756	1070	0.135	1.7e-05	0.135	1.8e-05	0.000301041	0.000401124	down	down		Promoter	ENSDART00000121652	zgc:113381 [Source:ZFIN;Acc:ZDB-GENE-050913-139]	ENSDARG00000054957
5_25799200_25799696	497	0.135	1.7e-05	0.135	1.8e-05	0.000301041	0.000401124	down	down		Promoter	ENSDART00000142517
6_40689001_40689429	429	0.135	1.7e-05	0.135	1.8e-05	0.000301041	0.000401124	down	down		Promoter	ENSDART00000026257	myosin, heavy chain b [Source:ZFIN;Acc:ZDB-GENE-081124-1]	ENSDARG00000001993
6_9386912_9387814	903	0.135	1.7e-05	0.135	1.8e-05	0.000301041	0.000401124	down	down		Promoter	ENSDART00000151355	prostaglandin E receptor 1a (subtype EP1) [Source:ZFIN;Acc:ZDB-GENE-120215-261]	ENSDARG00000078605
1_45302208_45302561	354	0.141	3.4e-05	0.141	3.5e-05	0.000516781	0.000605695	down	down		Promoter	ENSDART00000106684	lysine (K)-specific demethylase 2Aa [Source:ZFIN;Acc:ZDB-GENE-061215-144]	ENSDARG00000059653
12_11142434_11142896	463	0.141	3.4e-05	0.141	3.5e-05	0.000516781	0.000605695	down	down		Promoter	ENSDART00000153397
13_6209909_6210933	1025	0.141	3.4e-05	0.141	3.5e-05	0.000516781	0.000605695	down	down		Promoter	ENSDART00000148907	microcephalin 1 [Source:ZFIN;Acc:ZDB-GENE-060421-6122]	ENSDARG00000058372
16_24964014_24965076	1063	0.141	3.4e-05	0.141	3.5e-05	0.000516781	0.000605695	down	down		Promoter	ENSDART00000144107	lens epithelial protein [Source:ZFIN;Acc:ZDB-GENE-060130-3]	ENSDARG00000095553
16_39243508_39244063	556	0.141	3.4e-05	0.141	3.5e-05	0.000516781	0.000605695	down	down		Promoter	ENSDART00000076222	TAF12 RNA polymerase II, TATA box binding protein (TBP)-associated factor [Source:ZFIN;Acc:ZDB-GENE-031030-5]	ENSDARG00000054085
18_11901084_11901654	571	0.141	3.4e-05	0.141	3.5e-05	0.000516781	0.000605695	down	down		Promoter	ENSDART00000092522	si:ch211-1e14.1 [Source:ZFIN;Acc:ZDB-GENE-050420-149]	ENSDARG00000063361
19_31670251_31670970	720	0.141	3.4e-05	0.141	3.5e-05	0.000516781	0.000605695	down	down		Promoter	ENSDART00000144265	protein phosphatase 1, regulatory subunit 10 [Source:ZFIN;Acc:ZDB-GENE-020419-15]	ENSDARG00000032651
20_23826580_23827039	460	0.141	3.4e-05	0.141	3.5e-05	0.000516781	0.000605695	down	down		Promoter	ENSDART00000153079	si:dkey-15j16.3 [Source:ZFIN;Acc:ZDB-GENE-030131-4680]	ENSDARG00000042683
20_39544828_39545202	375	0.141	3.4e-05	0.141	3.5e-05	0.000516781	0.000605695	down	down		Promoter	ENSDART00000101062	solute carrier family 35, member D3 [Source:HGNC Symbol;Acc:15621]	ENSDARG00000053143
25_11508270_11509103	834	0.141	3.4e-05	0.141	3.5e-05	0.000516781	0.000605695	down	down		Promoter	ENSDART00000112789	Uncharacterized protein [Source:UniProtKB/TrEMBL;Acc:E7FEU1]	ENSDARG00000079994
3_10571207_10571755	549	0.141	3.4e-05	0.141	3.5e-05	0.000516781	0.000605695	down	down		Promoter	ENSDART00000149215
3_12521730_12522383	654	0.141	3.4e-05	0.141	3.5e-05	0.000516781	0.000605695	down	down		Promoter	ENSDART00000127868	cytochrome P450, family 2, subfamily W, polypeptide 1 [Source:HGNC Symbol;Acc:20243]	ENSDARG00000040424
3_55398909_55399232	324	0.141	3.4e-05	0.141	3.5e-05	0.000516781	0.000605695	down	down		Promoter	ENSDART00000018044	angiopoietin-like 6 [Source:ZFIN;Acc:ZDB-GENE-030131-9735]	ENSDARG00000020265
4_49160465_49161200	736	0.141	3.4e-05	0.141	3.5e-05	0.000516781	0.000605695	down	down		Promoter	ENSDART00000124177	si:rp71-1l17.2 [Source:ZFIN;Acc:ZDB-GENE-060503-564]	ENSDARG00000089779
4_5636391_5637971	1581	0.141	3.4e-05	0.141	3.5e-05	0.000516781	0.000605695	down	down	Y	Promoter	ENSDART00000113864	failed axon connections homolog (Drosophila) [Source:HGNC Symbol;Acc:20742]	ENSDARG00000075956
4_56737516_56738142	627	0.141	3.4e-05	0.141	3.5e-05	0.000516781	0.000605695	down	down		Promoter	ENSDART00000115230	Uncharacterized protein [Source:UniProtKB/TrEMBL;Acc:E7F1U5]	ENSDARG00000090493
4_59019910_59020269	360	0.141	3.4e-05	0.141	3.5e-05	0.000516781	0.000605695	down	down		Promoter	ENSDART00000130643	Uncharacterized protein [Source:UniProtKB/TrEMBL;Acc:E7FFC8]	ENSDARG00000088367
5_50794546_50795068	523	0.141	3.4e-05	0.141	3.5e-05	0.000516781	0.000605695	down	down		Promoter	ENSDART00000097450	si:dkey-172m14.2 [Source:ZFIN;Acc:ZDB-GENE-060526-222]	ENSDARG00000067664
5_75240277_75240856	580	0.141	3.4e-05	0.141	3.5e-05	0.000516781	0.000605695	down	down		Promoter	ENSDART00000027811	SET and MYND domain containing 1a [Source:ZFIN;Acc:ZDB-GENE-030131-9825]	ENSDARG00000009280
6_53096112_53096591	480	0.141	3.4e-05	0.141	3.5e-05	0.000516781	0.000605695	down	down		Promoter	ENSDART00000079694	guanine nucleotide binding protein (G protein), alpha inhibiting activity polypeptide 2b [Source:ZFIN;Acc:ZDB-GENE-030131-5861]	ENSDARG00000017294
6_58910230_58910632	403	0.141	3.4e-05	0.141	3.5e-05	0.000516781	0.000605695	down	down		Promoter	ENSDART00000050140	Uncharacterized protein [Source:UniProtKB/TrEMBL;Acc:E7EZT0]	ENSDARG00000013390
8_8305022_8305755	734	0.141	3.4e-05	0.141	3.5e-05	0.000516781	0.000605695	down	down		Promoter	ENSDART00000103624	Uncharacterized protein [Source:UniProtKB/TrEMBL;Acc:E7FFR6]	ENSDARG00000076494
1_57867595_57868394	800	0.148	6.6e-05	0.148	6.7e-05	0.000786188	0.00090835	down	down		Promoter	ENSDART00000152628	si:ch73-94k4.5 [Source:ZFIN;Acc:ZDB-GENE-121214-94]	ENSDARG00000096523
10_10751702_10752147	446	0.148	6.6e-05	0.148	6.7e-05	0.000786188	0.00090835	down	down		Promoter	ENSDART00000101077	prostaglandin D2 synthase a [Source:ZFIN;Acc:ZDB-GENE-081022-118]	ENSDARG00000069439
12_13215045_13215608	564	0.148	6.6e-05	0.148	6.7e-05	0.000786188	0.00090835	down	down		Promoter	ENSDART00000152431	glutamate receptor, ionotropic, delta 1b [Source:ZFIN;Acc:ZDB-GENE-121214-84]	ENSDARG00000044161
13_31847653_31848347	695	0.148	6.6e-05	0.148	6.7e-05	0.000786188	0.00090835	down	down		Promoter	ENSDART00000057432	sine oculis homeobox homolog 1a [Source:ZFIN;Acc:ZDB-GENE-040718-155]	ENSDARG00000039304
13_36380372_36380866	495	0.148	6.6e-05	0.148	6.7e-05	0.000786188	0.00090835	down	down		Promoter	ENSDART00000075299	zgc:153911 [Source:ZFIN;Acc:ZDB-GENE-061013-174]	ENSDARG00000002509
13_53872586_53873027	442	0.148	6.6e-05	0.148	6.7e-05	0.000786188	0.00090835	down	down		Promoter	ENSDART00000124154	Uncharacterized protein [Source:UniProtKB/TrEMBL;Acc:E7EYC0]	ENSDARG00000090744
14_12399295_12400267	973	0.148	6.6e-05	0.148	6.7e-05	0.000786188	0.00090835	down	down		Promoter	ENSDART00000136975
14_319855_320573	719	0.148	6.6e-05	0.148	6.7e-05	0.000786188	0.00090835	down	down		Promoter	ENSDART00000018677	COP9 signalosome subunit 6 [Source:HGNC Symbol;Acc:21749]	ENSDARG00000079173
14_4469573_4469928	356	0.148	6.6e-05	0.148	6.7e-05	0.000786188	0.00090835	down	down		Promoter	ENSDART00000042672	GUF1 GTPase homolog (S. cerevisiae) [Source:ZFIN;Acc:ZDB-GENE-030131-4289]	ENSDARG00000029088
14_45849235_45850234	1000	0.148	6.6e-05	0.148	6.7e-05	0.000786188	0.00090835	down	down		Promoter	ENSDART00000108825	alcohol dehydrogenase 5 [Source:ZFIN;Acc:ZDB-GENE-011003-1]	ENSDARG00000080010
14_47893336_47893701	366	0.148	6.6e-05	0.148	6.7e-05	0.000786188	0.00090835	down	down		Promoter	ENSDART00000091620	ATPase, aminophospholipid transporter (APLT), class I, type 8A, member 1 [Source:ZFIN;Acc:ZDB-GENE-060929-36]	ENSDARG00000063001
14_49132511_49133479	969	0.148	6.6e-05	0.148	6.7e-05	0.000786188	0.00090835	down	down		Promoter	ENSDART00000031640	zgc:113425 [Source:ZFIN;Acc:ZDB-GENE-050320-128]	ENSDARG00000026616
16_15646298_15646897	600	0.148	6.6e-05	0.148	6.7e-05	0.000786188	0.00090835	down	down		Promoter	ENSDART00000055465	si:ch211-149k23.9 [Source:ZFIN;Acc:ZDB-GENE-100922-15]	ENSDARG00000038052
16_16237601_16238928	1328	0.148	6.6e-05	0.148	6.7e-05	0.000786188	0.00090835	down	down		Promoter	ENSDART00000138438
18_46864135_46864818	684	0.148	6.6e-05	0.148	6.7e-05	0.000786188	0.00090835	down	down		Promoter	ENSDART00000128738	v-ets avian erythroblastosis virus E26 oncogene homolog 1 [Source:HGNC Symbol;Acc:3488]	ENSDARG00000024431
18_46986092_46986535	444	0.148	6.6e-05	0.148	6.7e-05	0.000786188	0.00090835	down	down		Promoter	ENSDART00000147074	friend leukemia integration 1a [Source:ZFIN;Acc:ZDB-GENE-980526-426]	ENSDARG00000054632
19_49038374_49039498	1125	0.148	6.6e-05	0.148	6.7e-05	0.000786188	0.00090835	down	down		Promoter	ENSDART00000139692	si:ch211-229b6.1 [Source:ZFIN;Acc:ZDB-GENE-060503-311]	ENSDARG00000093422
2_290056_290552	497	0.148	6.6e-05	0.148	6.7e-05	0.000786188	0.00090835	down	down		Promoter	ENSDART00000074539	Uncharacterized protein [Source:UniProtKB/TrEMBL;Acc:E7FC38]	ENSDARG00000052643
2_9915379_9915855	477	0.148	6.6e-05	0.148	6.7e-05	0.000786188	0.00090835	down	down		Promoter	ENSDART00000100726	insulin-like 5b [Source:ZFIN;Acc:ZDB-GENE-070122-5]	ENSDARG00000069294
21_25996382_25997240	859	0.148	6.6e-05	0.148	6.7e-05	0.000786188	0.00090835	down	down		Promoter	ENSDART00000002767	estrogen-related receptor alpha [Source:ZFIN;Acc:ZDB-GENE-990415-68]	ENSDARG00000069266
21_29910900_29911656	757	0.148	6.6e-05	0.148	6.7e-05	0.000786188	0.00090835	down	down		Promoter	ENSDART00000065366	ST6 beta-galactosamide alpha-2,6-sialyltranferase 1 [Source:ZFIN;Acc:ZDB-GENE-060322-3]	ENSDARG00000044514
22_1744743_1745076	334	0.148	6.6e-05	0.148	6.7e-05	0.000786188	0.00090835	down	down	Y	Promoter	ENSDART00000136686	si:ch73-92e7.1 [Source:ZFIN;Acc:ZDB-GENE-081031-81]	ENSDARG00000095397
23_12451798_12452918	1121	0.148	6.6e-05	0.148	6.7e-05	0.000786188	0.00090835	down	down		Promoter	ENSDART00000133956	phosphatase and actin regulator 3a [Source:ZFIN;Acc:ZDB-GENE-080220-4]	ENSDARG00000058243
25_6659812_6660510	699	0.148	6.6e-05	0.148	6.7e-05	0.000786188	0.00090835	down	down		Promoter	ENSDART00000142705	cellular retinoic acid binding protein 1a [Source:ZFIN;Acc:ZDB-GENE-020320-3]	ENSDARG00000045926
3_4709500_4709900	401	0.148	6.6e-05	0.148	6.7e-05	0.000786188	0.00090835	down	down		Promoter	ENSDART00000131778
4_53465112_53465566	455	0.148	6.6e-05	0.148	6.7e-05	0.000786188	0.00090835	down	down		Promoter	ENSDART00000150372	si:ch211-152l15.4 [Source:ZFIN;Acc:ZDB-GENE-110913-78]	ENSDARG00000094888
4_58863568_58864315	748	0.148	6.6e-05	0.148	6.7e-05	0.000786188	0.00090835	down	down		Promoter	ENSDART00000146531	si:dkey-262g12.3 [Source:ZFIN;Acc:ZDB-GENE-060503-255]	ENSDARG00000094612
6_76747_77091	345	0.148	6.6e-05	0.148	6.7e-05	0.000786188	0.00090835	down	down		Promoter	ENSDART00000151245	sphingosine-1-phosphate receptor 5b [Source:ZFIN;Acc:ZDB-GENE-061201-27]	ENSDARG00000052192
7_6077838_6078439	602	0.148	6.6e-05	0.148	6.7e-05	0.000786188	0.00090835	down	down		Promoter	ENSDART00000122284	Uncharacterized protein [Source:UniProtKB/TrEMBL;Acc:E7FA29]	ENSDARG00000086113
7_61024391_61025688	1298	0.148	6.6e-05	0.148	6.7e-05	0.000786188	0.00090835	down	down		Promoter	ENSDART00000148038	leucine rich repeat and fibronectin type III domain containing 4 [Source:HGNC Symbol;Acc:28456]	ENSDARG00000078078
1_55310409_55311743	1335	0.156	6.4e-05	0.156	0.000128	0.000786188	0.00159465	down	down		Promoter	ENSDART00000129831	zgc:136791 [Source:ZFIN;Acc:ZDB-GENE-060421-8264]	ENSDARG00000091320
10_2714260_2714949	690	0.156	6.4e-05	0.156	0.000128	0.000786188	0.00159465	down	down		Promoter	ENSDART00000120110
12_36771490_36771904	415	0.156	6.4e-05	0.156	0.000128	0.000786188	0.00159465	down	down		Promoter	ENSDART00000153084
13_16569345_16569820	476	0.156	6.4e-05	0.156	0.000128	0.000786188	0.00159465	down	down		Promoter	ENSDART00000122557	potassium large conductance calcium-activated channel, subfamily M, alpha member 1a [Source:ZFIN;Acc:ZDB-GENE-070202-9]	ENSDARG00000079840
13_37374351_37374753	403	0.156	6.4e-05	0.156	0.000128	0.000786188	0.00159465	down	down		Promoter	ENSDART00000138104	FERM domain containing 6 [Source:ZFIN;Acc:ZDB-GENE-050522-354]	ENSDARG00000002332
13_38071054_38071624	571	0.156	6.4e-05	0.156	0.000128	0.000786188	0.00159465	down	down		Promoter	ENSDART00000121178
14_26113054_26113774	721	0.156	6.4e-05	0.156	0.000128	0.000786188	0.00159465	down	down		Promoter	ENSDART00000000392	phosphodiesterase 6A, cGMP-specific, rod, alpha [Source:ZFIN;Acc:ZDB-GENE-030616-42]	ENSDARG00000000380
14_34983457_34984087	631	0.156	6.4e-05	0.156	0.000128	0.000786188	0.00159465	down	down		Promoter	ENSDART00000052860	forkhead box A sequence [Source:ZFIN;Acc:ZDB-GENE-990415-76]	ENSDARG00000036385
14_49223463_49224067	605	0.156	6.4e-05	0.156	0.000128	0.000786188	0.00159465	down	down		Promoter	ENSDART00000074099	calcium binding protein 2b [Source:ZFIN;Acc:ZDB-GENE-081028-55]	ENSDARG00000052277
15_33753512_33754280	769	0.156	6.4e-05	0.156	0.000128	0.000786188	0.00159465	down	down		Promoter	ENSDART00000059954	mesenchyme homeobox 2 [Source:HGNC Symbol;Acc:7014]	ENSDARG00000040911
16_52008714_52009118	405	0.156	6.4e-05	0.156	0.000128	0.000786188	0.00159465	down	down		Promoter	ENSDART00000127267	notch homolog, like [Source:ZFIN;Acc:ZDB-GENE-070220-2]	ENSDARG00000088308
18_222653_223347	695	0.156	6.4e-05	0.156	0.000128	0.000786188	0.00159465	down	down		Promoter	ENSDART00000149321	histidine decarboxylase [Source:ZFIN;Acc:ZDB-GENE-080102-5]	ENSDARG00000075454
19_10406775_10407162	388	0.156	6.4e-05	0.156	0.000128	0.000786188	0.00159465	down	down		Promoter	ENSDART00000138310	calcium channel, voltage-dependent, gamma subunit 6a [Source:ZFIN;Acc:ZDB-GENE-060503-440]	ENSDARG00000036457
19_11095885_11096477	593	0.156	6.4e-05	0.156	0.000128	0.000786188	0.00159465	down	down		Promoter	ENSDART00000125718	si:ch211-171h4.7 [Source:ZFIN;Acc:ZDB-GENE-120215-25]	ENSDARG00000088408
2_15327387_15327876	490	0.156	6.4e-05	0.156	0.000128	0.000786188	0.00159465	down	down		Promoter	ENSDART00000133069	collagen, type XI, alpha 1b [Source:ZFIN;Acc:ZDB-GENE-070912-607]	ENSDARG00000009014
2_22056354_22057293	940	0.156	6.4e-05	0.156	0.000128	0.000786188	0.00159465	down	down		Promoter	ENSDART00000038514	septin 2 [Source:ZFIN;Acc:ZDB-GENE-030131-911]	ENSDARG00000027590
20_14369931_14370835	905	0.156	6.4e-05	0.156	0.000128	0.000786188	0.00159465	down	down		Promoter	ENSDART00000152366
20_34358602_34359491	890	0.156	6.4e-05	0.156	0.000128	0.000786188	0.00159465	down	down		Promoter	ENSDART00000144922
20_53091869_53092479	611	0.156	6.4e-05	0.156	0.000128	0.000786188	0.00159465	down	down		Promoter	ENSDART00000037072	Uncharacterized protein [Source:UniProtKB/TrEMBL;Acc:E7EY70]	ENSDARG00000079243
21_2479477_2480634	1158	0.156	6.4e-05	0.156	0.000128	0.000786188	0.00159465	down	down		Promoter	ENSDART00000139098	programmed cell death 1 ligand 2 [Source:HGNC Symbol;Acc:18731]	ENSDARG00000059310
21_29040490_29040901	412	0.156	6.4e-05	0.156	0.000128	0.000786188	0.00159465	down	down		Promoter	ENSDART00000142903
21_37049439_37049935	497	0.156	6.4e-05	0.156	0.000128	0.000786188	0.00159465	down	down		Promoter	ENSDART00000147219	Kruppel-like factor 8 [Source:HGNC Symbol;Acc:6351]	ENSDARG00000060661
22_33381135_33381574	440	0.156	6.4e-05	0.156	0.000128	0.000786188	0.00159465	down	down		Promoter	ENSDART00000122317	Uncharacterized protein [Source:UniProtKB/TrEMBL;Acc:E7F6V9]	ENSDARG00000077466
22_4536877_4537573	697	0.156	6.4e-05	0.156	0.000128	0.000786188	0.00159465	down	down		Promoter	ENSDART00000147002	si:ch73-256j6.4 [Source:ZFIN;Acc:ZDB-GENE-030131-3779]	ENSDARG00000093574
23_19940853_19941472	620	0.156	6.4e-05	0.156	0.000128	0.000786188	0.00159465	down	down		Promoter	ENSDART00000104441	abhydrolase domain containing 6b [Source:ZFIN;Acc:ZDB-GENE-070410-104]	ENSDARG00000070894
23_24370424_24371056	633	0.156	6.4e-05	0.156	0.000128	0.000786188	0.00159465	down	down		Promoter	ENSDART00000139710	tubulin tyrosine ligase-like family, member 10 [Source:ZFIN;Acc:ZDB-GENE-081104-350]	ENSDARG00000090472
24_25815843_25816389	547	0.156	6.4e-05	0.156	0.000128	0.000786188	0.00159465	down	down		Promoter	ENSDART00000081043	zgc:174160 [Source:ZFIN;Acc:ZDB-GENE-030131-6252]	ENSDARG00000058260
25_24861690_24862022	333	0.156	6.4e-05	0.156	0.000128	0.000786188	0.00159465	down	down		Promoter	ENSDART00000067200	si:dkeyp-19e1.3 [Source:ZFIN;Acc:ZDB-GENE-081104-56]	ENSDARG00000051836
5_16344584_16345157	574	0.156	6.4e-05	0.156	0.000128	0.000786188	0.00159465	down	down		Promoter	ENSDART00000117090
5_22993725_22994230	506	0.156	6.4e-05	0.156	0.000128	0.000786188	0.00159465	down	down		Promoter	ENSDART00000088492	bone morphogenetic protein 10 [Source:ZFIN;Acc:ZDB-GENE-060526-211]	ENSDARG00000061769
5_70111735_70112718	984	0.156	6.4e-05	0.156	0.000128	0.000786188	0.00159465	down	down		Promoter	ENSDART00000065262	ribosomal protein S6 kinase, polypeptide 4 [Source:ZFIN;Acc:ZDB-GENE-060526-284]	ENSDARG00000044436
5_8038143_8038432	290	0.156	6.4e-05	0.156	0.000128	0.000786188	0.00159465	down	down		Promoter	ENSDART00000130294	Uncharacterized protein [Source:UniProtKB/TrEMBL;Acc:F1QH24]	ENSDARG00000089782
6_27375477_27375969	493	0.156	6.4e-05	0.156	0.000128	0.000786188	0.00159465	down	down		Promoter	ENSDART00000127126	RAB6B, member RAS oncogene family a [Source:ZFIN;Acc:ZDB-GENE-050809-136]	ENSDARG00000034522
6_29118744_29119221	478	0.156	6.4e-05	0.156	0.000128	0.000786188	0.00159465	down	down		Promoter	ENSDART00000115031	mitochondrial ribosomal protein L47 [Source:HGNC Symbol;Acc:16652]	ENSDARG00000075743
6_7037122_7038290	1169	0.156	6.4e-05	0.156	0.000128	0.000786188	0.00159465	down	down		Promoter	ENSDART00000151311	G protein-coupled receptor 161 [Source:HGNC Symbol;Acc:23694]	ENSDARG00000058903
9_2272010_2272532	523	0.156	6.4e-05	0.156	0.000128	0.000786188	0.00159465	down	down		Promoter	ENSDART00000140256
9_25456861_25457630	770	0.156	6.4e-05	0.156	0.000128	0.000786188	0.00159465	down	down		Promoter	ENSDART00000134445
9_38801994_38802399	406	0.156	6.4e-05	0.156	0.000128	0.000786188	0.00159465	down	down		Promoter	ENSDART00000132782
1_13862749_13863312	564	0.164	0.000119	0.164	0.000249	0.00114921	0.00245817	down	down	Y	Promoter	ENSDART00000111475	protocadherin 7a [Source:ZFIN;Acc:ZDB-GENE-120206-1]	ENSDARG00000078898
1_1883794_1884991	1198	0.164	0.000119	0.164	0.000249	0.00114921	0.00245817	down	down		Promoter	ENSDART00000022019	muscleblind-like 2 (Drosophila) [Source:ZFIN;Acc:ZDB-GENE-030131-9582]	ENSDARG00000018460
1_46363169_46363897	729	0.164	0.000119	0.164	0.000249	0.00114921	0.00245817	down	down		Promoter	ENSDART00000144735	patatin-like phospholipase domain containing 6 [Source:ZFIN;Acc:ZDB-GENE-050107-4]	ENSDARG00000010773
1_47219315_47220096	782	0.164	0.000119	0.164	0.000249	0.00114921	0.00245817	down	down	Y	Promoter	ENSDART00000117230
1_50422984_50423843	860	0.164	0.000119	0.164	0.000249	0.00114921	0.00245817	down	down		Promoter	ENSDART00000143556
1_56602887_56603297	411	0.164	0.000119	0.164	0.000249	0.00114921	0.00245817	down	down		Promoter	ENSDART00000119085
11_24198201_24198918	718	0.164	0.000119	0.164	0.000249	0.00114921	0.00245817	down	down		Promoter	ENSDART00000110152	colony stimulating factor 1a (macrophage) [Source:ZFIN;Acc:ZDB-GENE-080204-107]	ENSDARG00000075343
12_50683192_50684026	835	0.164	0.000119	0.164	0.000249	0.00114921	0.00245817	down	down		Promoter	ENSDART00000127739	Uncharacterized protein [Source:UniProtKB/TrEMBL;Acc:F1QBM5]	ENSDARG00000090343
13_31134459_31135162	704	0.164	0.000119	0.164	0.000249	0.00114921	0.00245817	down	down		Promoter	ENSDART00000133138	dorsal root ganglia homeobox [Source:ZFIN;Acc:ZDB-GENE-070330-1]	ENSDARG00000069329
13_48638943_48639434	492	0.164	0.000119	0.164	0.000249	0.00114921	0.00245817	down	down		Promoter	ENSDART00000123188	si:ch211-127b6.2 [Source:ZFIN;Acc:ZDB-GENE-081103-37]	ENSDARG00000088353
13_8485238_8486184	947	0.164	0.000119	0.164	0.000249	0.00114921	0.00245817	down	down		Promoter	ENSDART00000137255	HtrA serine peptidase 2 [Source:HGNC Symbol;Acc:14348]	ENSDARG00000094236
14_2995212_2995871	660	0.164	0.000119	0.164	0.000249	0.00114921	0.00245817	down	down		Promoter	ENSDART00000106688	protocadherin 2 gamma 29 [Source:ZFIN;Acc:ZDB-GENE-050610-20]	ENSDARG00000076707
14_41552774_41553396	623	0.164	0.000119	0.164	0.000249	0.00114921	0.00245817	down	down		Promoter	ENSDART00000119994
14_6433189_6433796	608	0.164	0.000119	0.164	0.000249	0.00114921	0.00245817	down	down		Promoter	ENSDART00000148461	ATP-binding cassette, sub-family A (ABC1), member 1B [Source:ZFIN;Acc:ZDB-GENE-030131-9826]	ENSDARG00000079009
14_6564497_6565217	721	0.164	0.000119	0.164	0.000249	0.00114921	0.00245817	down	down		Promoter	ENSDART00000135909
15_25425344_25425886	543	0.164	0.000119	0.164	0.000249	0.00114921	0.00245817	down	down		Promoter	ENSDART00000110408	DPH1 homolog (S. cerevisiae) [Source:ZFIN;Acc:ZDB-GENE-050417-411]	ENSDARG00000057973
16_13611671_13612378	708	0.164	0.000119	0.164	0.000249	0.00114921	0.00245817	down	down		Promoter	ENSDART00000145754	chemokine (C-X-C motif) receptor 3, tandem duplicate 1 [Source:ZFIN;Acc:ZDB-GENE-060130-38]	ENSDARG00000007358
16_29571557_29571982	426	0.164	0.000119	0.164	0.000249	0.00114921	0.00245817	down	down		Promoter	ENSDART00000078250	nuclear receptor subfamily 4, group A, member 3 [Source:ZFIN;Acc:ZDB-GENE-070824-4]	ENSDARG00000055854
16_31083482_31084523	1042	0.164	0.000119	0.164	0.000249	0.00114921	0.00245817	down	down		Promoter	ENSDART00000078543	synaptotagmin XIb [Source:ZFIN;Acc:ZDB-GENE-090601-7]	ENSDARG00000056105
17_8162121_8162834	714	0.164	0.000119	0.164	0.000249	0.00114921	0.00245817	down	down		Promoter	ENSDART00000081651	CDC42 binding protein kinase alpha (DMPK-like) [Source:HGNC Symbol;Acc:1737]	ENSDARG00000058760
18_1540210_1541218	1009	0.164	0.000119	0.164	0.000249	0.00114921	0.00245817	down	down		Promoter	ENSDART00000141299	unc-13 homolog C (C. elegans) [Source:ZFIN;Acc:ZDB-GENE-060503-478]	ENSDARG00000069731
18_15988439_15989203	765	0.164	0.000119	0.164	0.000249	0.00114921	0.00245817	down	down		Promoter	ENSDART00000110278	Ras association (RalGDS/AF-6) domain family (N-terminal) member 9 [Source:ZFIN;Acc:ZDB-GENE-091204-470]	ENSDARG00000074721
18_21050913_21052102	1190	0.164	0.000119	0.164	0.000249	0.00114921	0.00245817	down	down		Promoter	ENSDART00000143265	HYDIN, axonemal central pair apparatus protein [Source:ZFIN;Acc:ZDB-GENE-050419-219]	ENSDARG00000056764
18_24835294_24836176	883	0.164	0.000119	0.164	0.000249	0.00114921	0.00245817	down	down		Promoter	ENSDART00000013082	ST8 alpha-N-acetyl-neuraminide alpha-2,8-sialyltransferase 2 [Source:ZFIN;Acc:ZDB-GENE-020919-4]	ENSDARG00000018788
18_48076189_48077069	881	0.164	0.000119	0.164	0.000249	0.00114921	0.00245817	down	down		Promoter	ENSDART00000086350	si:ch211-136a13.1 [Source:ZFIN;Acc:ZDB-GENE-050419-214]	ENSDARG00000060927
19_13065051_13067069	2019	0.164	0.000119	0.164	0.000249	0.00114921	0.00245817	down	down		Promoter	ENSDART00000135706	low density lipoprotein receptor class A domain containing 4 [Source:HGNC Symbol;Acc:1224]	ENSDARG00000070555
19_34179942_34180723	782	0.164	0.000119	0.164	0.000249	0.00114921	0.00245817	down	down		Promoter	ENSDART00000008698	serine/threonine kinase 3 (STE20 homolog, yeast) [Source:ZFIN;Acc:ZDB-GENE-030131-2845]	ENSDARG00000011312
19_44595884_44596586	703	0.164	0.000119	0.164	0.000249	0.00114921	0.00245817	down	down		Promoter	ENSDART00000124447	Uncharacterized protein [Source:UniProtKB/TrEMBL;Acc:E7F6S6]	ENSDARG00000087408
2_18492901_18493268	368	0.164	0.000119	0.164	0.000249	0.00114921	0.00245817	down	down		Promoter	ENSDART00000144413	si:dkey-236a14.4 [Source:ZFIN;Acc:ZDB-GENE-070912-463]	ENSDARG00000095093
2_23210244_23211194	951	0.164	0.000119	0.164	0.000249	0.00114921	0.00245817	down	down		Promoter	ENSDART00000148309	si:dkey-43b14.7 [Source:ZFIN;Acc:ZDB-GENE-070912-537]	ENSDARG00000056894
21_41956577_41958485	1909	0.164	0.000119	0.164	0.000249	0.00114921	0.00245817	down	down		Promoter	ENSDART00000151627	NHS-like 2 [Source:HGNC Symbol;Acc:33737]	ENSDARG00000090164
21_7715399_7715900	502	0.164	0.000119	0.164	0.000249	0.00114921	0.00245817	down	down		Promoter	ENSDART00000011096	nuclear receptor subfamily 6, group A, member 1b [Source:ZFIN;Acc:ZDB-GENE-040724-202]	ENSDARG00000014480
21_7871324_7871990	667	0.164	0.000119	0.164	0.000249	0.00114921	0.00245817	down	down		Promoter	ENSDART00000132599	NIMA (never in mitosis gene a)-related kinase 6 [Source:ZFIN;Acc:ZDB-GENE-040724-133]	ENSDARG00000037963
22_2902485_2903344	860	0.164	0.000119	0.164	0.000249	0.00114921	0.00245817	down	down		Promoter	ENSDART00000134085	si:dkey-1b17.14 [Source:ZFIN;Acc:ZDB-GENE-050208-794]	ENSDARG00000093870
23_2775865_2776517	653	0.164	0.000119	0.164	0.000249	0.00114921	0.00245817	down	down		Promoter	ENSDART00000129719	topoisomerase (DNA) I [Source:ZFIN;Acc:ZDB-GENE-030131-5390]	ENSDARG00000086775
25_14694935_14695949	1015	0.164	0.000119	0.164	0.000249	0.00114921	0.00245817	down	down		Promoter	ENSDART00000103957	exocyst complex component 3-like 1 [Source:ZFIN;Acc:ZDB-GENE-061207-36]	ENSDARG00000051899
25_2341215_2343149	1935	0.164	0.000119	0.164	0.000249	0.00114921	0.00245817	down	down		Promoter	ENSDART00000126521	Uncharacterized protein [Source:UniProtKB/TrEMBL;Acc:E7F0Y2]	ENSDARG00000088397
25_23930903_23931606	704	0.164	0.000119	0.164	0.000249	0.00114921	0.00245817	down	down		Promoter	ENSDART00000127416	Uncharacterized protein [Source:UniProtKB/TrEMBL;Acc:F1R910]	ENSDARG00000086857
25_38218241_38218918	678	0.164	0.000119	0.164	0.000249	0.00114921	0.00245817	down	down		Promoter	ENSDART00000128108	5-hydroxyisourate hydrolase-like (LOC570474), mRNA [Source:RefSeq mRNA;Acc:NM_001200021]	ENSDARG00000089331
25_3949190_3950019	830	0.164	0.000119	0.164	0.000249	0.00114921	0.00245817	down	down		Promoter	ENSDART00000043172	transmembrane protein 258 [Source:ZFIN;Acc:ZDB-GENE-040426-1739]	ENSDARG00000078785
4_2846163_2846929	767	0.164	0.000119	0.164	0.000249	0.00114921	0.00245817	down	down		Promoter	ENSDART00000150794	pleckstrin homology domain containing, family A member 5 [Source:ZFIN;Acc:ZDB-GENE-041210-25]	ENSDARG00000045870
4_38160377_38160972	596	0.164	0.000119	0.164	0.000249	0.00114921	0.00245817	down	down		Promoter	ENSDART00000128405
4_7447457_7448102	646	0.164	0.000119	0.164	0.000249	0.00114921	0.00245817	down	down		Promoter	ENSDART00000143042
5_9811454_9812141	688	0.164	0.000119	0.164	0.000249	0.00114921	0.00245817	down	down		Promoter	ENSDART00000124384	Uncharacterized protein [Source:UniProtKB/TrEMBL;Acc:F1QH49]	ENSDARG00000090654
6_10935226_10935552	327	0.164	0.000119	0.164	0.000249	0.00114921	0.00245817	down	down		Promoter	ENSDART00000065433	ATP-binding cassette, sub-family C (CFTR/MRP), member 6a [Source:ZFIN;Acc:ZDB-GENE-050517-18]	ENSDARG00000016750
6_16408769_16409165	397	0.164	0.000119	0.164	0.000249	0.00114921	0.00245817	down	down		Promoter	ENSDART00000126318	Uncharacterized protein [Source:UniProtKB/TrEMBL;Acc:E7FBI6]	ENSDARG00000076865
6_34850204_34850734	531	0.164	0.000119	0.164	0.000249	0.00114921	0.00245817	down	down		Promoter	ENSDART00000138628	interleukin 12 receptor, beta 2 [Source:HGNC Symbol;Acc:5972]	ENSDARG00000093809
7_29740286_29740938	653	0.164	0.000119	0.164	0.000249	0.00114921	0.00245817	down	down		Promoter	ENSDART00000076496	serine/threonine kinase 33 [Source:ZFIN;Acc:ZDB-GENE-040724-242]	ENSDARG00000054318
7_50474145_50475252	1108	0.164	0.000119	0.164	0.000249	0.00114921	0.00245817	down	down		Promoter	ENSDART00000145482	si:ch211-288d18.1 [Source:ZFIN;Acc:ZDB-GENE-060503-323]	ENSDARG00000011088
7_73891521_73892234	714	0.164	0.000119	0.164	0.000249	0.00114921	0.00245817	down	down		Promoter	ENSDART00000149682	DEAH (Asp-Glu-Ala-His) box polypeptide 15 [Source:ZFIN;Acc:ZDB-GENE-030131-650]	ENSDARG00000015392
1_40040005_40040748	744	0.174	0.00022	0.174	0.000484	0.00171307	0.00351239	down	down		Promoter	ENSDART00000138659
1_47094758_47095120	363	0.174	0.00022	0.174	0.000484	0.00171307	0.00351239	down	down		Promoter	ENSDART00000132861	calcium binding protein 39-like [Source:ZFIN;Acc:ZDB-GENE-041114-204]	ENSDARG00000036658
1_8026197_8026570	374	0.174	0.00022	0.174	0.000484	0.00171307	0.00351239	down	down		Promoter	ENSDART00000139699
10_46296304_46296887	584	0.174	0.00022	0.174	0.000484	0.00171307	0.00351239	down	down		Promoter	ENSDART00000062348	mitochondrial ribosomal protein S24 [Source:ZFIN;Acc:ZDB-GENE-050522-393]	ENSDARG00000042517
11_12717557_12719082	1526	0.174	0.00022	0.174	0.000484	0.00171307	0.00351239	down	down		Promoter	ENSDART00000121925
11_38221779_38222075	297	0.174	0.00022	0.174	0.000484	0.00171307	0.00351239	down	down		Promoter	ENSDART00000120992
11_38615079_38615718	640	0.174	0.00022	0.174	0.000484	0.00171307	0.00351239	down	down		Promoter	ENSDART00000114670	mitochondrial ribosomal protein S2 [Source:ZFIN;Acc:ZDB-GENE-070112-992]	ENSDARG00000068635
11_6301783_6302313	531	0.174	0.00022	0.174	0.000484	0.00171307	0.00351239	down	down		Promoter	ENSDART00000104405	chemokine (C-C motif) ligand 25b [Source:ZFIN;Acc:ZDB-GENE-110222-2]	ENSDARG00000070873
12_4525951_4527507	1557	0.174	0.00022	0.174	0.000484	0.00171307	0.00351239	down	down		Promoter	ENSDART00000144067	calcium binding protein 5a [Source:ZFIN;Acc:ZDB-GENE-040426-1655]	ENSDARG00000002576
13_31572346_31572789	444	0.174	0.00022	0.174	0.000484	0.00171307	0.00351239	down	down		Promoter	ENSDART00000134343	ribosomal RNA processing 12 homolog (S. cerevisiae) [Source:ZFIN;Acc:ZDB-GENE-050706-182]	ENSDARG00000022410
13_32852344_32852752	409	0.174	0.00022	0.174	0.000484	0.00171307	0.00351239	down	down		Promoter	ENSDART00000100663	WD repeat domain 35 [Source:ZFIN;Acc:ZDB-GENE-060810-148]	ENSDARG00000069269
13_33360951_33361365	415	0.174	0.00022	0.174	0.000484	0.00171307	0.00351239	down	down		Promoter	ENSDART00000026280	pleckstrin 2 [Source:ZFIN;Acc:ZDB-GENE-080219-2]	ENSDARG00000012789
13_8452032_8452527	496	0.174	0.00022	0.174	0.000484	0.00171307	0.00351239	down	down		Promoter	ENSDART00000102123	HtrA serine peptidase 2 [Source:HGNC Symbol;Acc:14348]	ENSDARG00000092061
13_8825988_8827238	1251	0.174	0.00022	0.174	0.000484	0.00171307	0.00351239	down	down		Promoter	ENSDART00000078361
14_2316282_2317126	845	0.174	0.00022	0.174	0.000484	0.00171307	0.00351239	down	down		Promoter	ENSDART00000088833	Uncharacterized protein [Source:UniProtKB/TrEMBL;Acc:E7F647]	ENSDARG00000061909
14_46739594_46741317	1724	0.174	0.00022	0.174	0.000484	0.00171307	0.00351239	down	down		Promoter	ENSDART00000119940
14_51922664_51923375	712	0.174	0.00022	0.174	0.000484	0.00171307	0.00351239	down	down		Promoter	ENSDART00000101132	tetraspanin 17 [Source:HGNC Symbol;Acc:13594]	ENSDARG00000053183
14_9914224_9914931	708	0.174	0.00022	0.174	0.000484	0.00171307	0.00351239	down	down		Promoter	ENSDART00000044203	Uncharacterized protein; Uncharacterized protein [Source:UniProtKB/TrEMBL;Acc:E7FF03]	ENSDARG00000059317
16_36755803_36756286	484	0.174	0.00022	0.174	0.000484	0.00171307	0.00351239	down	down		Promoter	ENSDART00000110258	human immunodeficiency virus type I enhancer binding protein 3b [Source:ZFIN;Acc:ZDB-GENE-100922-42]	ENSDARG00000037154
16_46238158_46238644	487	0.174	0.00022	0.174	0.000484	0.00171307	0.00351239	down	down		Promoter	ENSDART00000032778	ring finger protein 144B [Source:HGNC Symbol;Acc:21578]	ENSDARG00000024940
17_4086186_4086955	770	0.174	0.00022	0.174	0.000484	0.00171307	0.00351239	down	down		Promoter	ENSDART00000022233	N-ethylmaleimide-sensitive factor attachment protein, beta [Source:HGNC Symbol;Acc:15751]	ENSDARG00000013669
18_34969622_34970043	422	0.174	0.00022	0.174	0.000484	0.00171307	0.00351239	down	down		Promoter	ENSDART00000134854
19_14664198_14665090	893	0.174	0.00022	0.174	0.000484	0.00171307	0.00351239	down	down		Promoter	ENSDART00000055619	phosphatase and actin regulator 4a [Source:ZFIN;Acc:ZDB-GENE-051030-69]	ENSDARG00000015552
19_47938314_47939045	732	0.174	0.00022	0.174	0.000484	0.00171307	0.00351239	down	down		Promoter	ENSDART00000134430
2_23782841_23783471	631	0.174	0.00022	0.174	0.000484	0.00171307	0.00351239	down	down		Promoter	ENSDART00000024058	potassium voltage-gated channel, subfamily H (eag-related), member 2 [Source:ZFIN;Acc:ZDB-GENE-070912-699]	ENSDARG00000029881
2_31981455_31982657	1203	0.174	0.00022	0.174	0.000484	0.00171307	0.00351239	down	down		Promoter	ENSDART00000039717	family with sequence similarity 49, member Ba [Source:ZFIN;Acc:ZDB-GENE-030131-9537]	ENSDARG00000020929
2_43890664_43891338	675	0.174	0.00022	0.174	0.000484	0.00171307	0.00351239	down	down		Promoter	ENSDART00000005449	zinc finger E-box binding homeobox 1a [Source:ZFIN;Acc:ZDB-GENE-070912-124]	ENSDARG00000016788
2_54798653_54799020	368	0.174	0.00022	0.174	0.000484	0.00171307	0.00351239	down	down		Promoter	ENSDART00000111325	Uncharacterized protein [Source:UniProtKB/TrEMBL;Acc:E7FFV2]	ENSDARG00000076722
20_2755449_2757073	1625	0.174	0.00022	0.174	0.000484	0.00171307	0.00351239	down	down		Promoter	ENSDART00000145730
20_37519304_37519751	448	0.174	0.00022	0.174	0.000484	0.00171307	0.00351239	down	down		Promoter	ENSDART00000153092
21_11442236_11443230	995	0.174	0.00022	0.174	0.000484	0.00171307	0.00351239	down	down		Promoter	ENSDART00000146062	sperm antigen with calponin homology and coiled-coil domains 1-like b [Source:ZFIN;Acc:ZDB-GENE-090423-1]	ENSDARG00000042232
21_1291273_1292319	1047	0.174	0.00022	0.174	0.000484	0.00171307	0.00351239	down	down		Promoter	ENSDART00000129678	Uncharacterized protein [Source:UniProtKB/TrEMBL;Acc:E7EYI1]	ENSDARG00000086023
21_16321046_16322162	1117	0.174	0.00022	0.174	0.000484	0.00171307	0.00351239	down	down		Promoter	ENSDART00000120735
21_38029044_38029629	586	0.174	0.00022	0.174	0.000484	0.00171307	0.00351239	down	down		Promoter	ENSDART00000113607	carboxypeptidase D, b [Source:ZFIN;Acc:ZDB-GENE-060929-1270]	ENSDARG00000053877
21_5789607_5790180	574	0.174	0.00022	0.174	0.000484	0.00171307	0.00351239	down	down		Promoter	ENSDART00000151494	TATA box binding protein (TBP)-associated factor, RNA polymerase I, C, 110kDa [Source:HGNC Symbol;Acc:11534]	ENSDARG00000096310
21_6115873_6116148	276	0.174	0.00022	0.174	0.000484	0.00171307	0.00351239	down	down		Promoter	ENSDART00000147716
22_17458507_17459875	1369	0.174	0.00022	0.174	0.000484	0.00171307	0.00351239	down	down		Promoter	ENSDART00000090069	axonemal dynein light chain domain containing 1 [Source:ZFIN;Acc:ZDB-GENE-050208-341]	ENSDARG00000062355
22_28723823_28724250	428	0.174	0.00022	0.174	0.000484	0.00171307	0.00351239	down	down		Promoter	ENSDART00000124126	si:ch211-258f1.3 [Source:ZFIN;Acc:ZDB-GENE-070912-252]	ENSDARG00000087316
22_31107030_31107721	692	0.174	0.00022	0.174	0.000484	0.00171307	0.00351239	down	down		Promoter	ENSDART00000120368
23_20652004_20652385	382	0.174	0.00022	0.174	0.000484	0.00171307	0.00351239	down	down		Promoter	ENSDART00000133373	si:rp71-17i16.5 [Source:ZFIN;Acc:ZDB-GENE-090312-117]	ENSDARG00000037527
25_15708299_15708771	473	0.174	0.00022	0.174	0.000484	0.00171307	0.00351239	down	down		Promoter	ENSDART00000090397	KIAA1549-like a [Source:ZFIN;Acc:ZDB-GENE-061207-55]	ENSDARG00000062477
25_36191312_36191920	609	0.174	0.00022	0.174	0.000484	0.00171307	0.00351239	down	down		Promoter	ENSDART00000125128	zgc:114037 [Source:ZFIN;Acc:ZDB-GENE-050731-6]	ENSDARG00000086304
25_3950804_3951386	583	0.174	0.00022	0.174	0.000484	0.00171307	0.00351239	down	down		Promoter	ENSDART00000043172	transmembrane protein 258 [Source:ZFIN;Acc:ZDB-GENE-040426-1739]	ENSDARG00000078785
4_32672857_32673720	864	0.174	0.00022	0.174	0.000484	0.00171307	0.00351239	down	down		Promoter	ENSDART00000122622	si:dkey-122c11.4 [Source:ZFIN;Acc:ZDB-GENE-110913-45]	ENSDARG00000091214
4_41222339_41222797	459	0.174	0.00022	0.174	0.000484	0.00171307	0.00351239	down	down		Promoter	ENSDART00000150607
4_54295331_54296367	1037	0.174	0.00022	0.174	0.000484	0.00171307	0.00351239	down	down		Promoter	ENSDART00000150792	si:dkey-264f17.2 [Source:ZFIN;Acc:ZDB-GENE-110913-14]	ENSDARG00000087499
5_14026184_14026900	717	0.174	0.00022	0.174	0.000484	0.00171307	0.00351239	down	down		Promoter	ENSDART00000019461	purinergic receptor P2X, ligand-gated ion channel, 2 [Source:ZFIN;Acc:ZDB-GENE-030319-2]	ENSDARG00000002300
5_33185657_33186380	724	0.174	0.00022	0.174	0.000484	0.00171307	0.00351239	down	down		Promoter	ENSDART00000141664
5_56471585_56472007	423	0.174	0.00022	0.174	0.000484	0.00171307	0.00351239	down	down		Promoter	ENSDART00000050983	protein prenyltransferase alpha subunit repeat containing 1 [Source:ZFIN;Acc:ZDB-GENE-060526-17]	ENSDARG00000067695
6_13625318_13625941	624	0.174	0.00022	0.174	0.000484	0.00171307	0.00351239	down	down	Y	Promoter	ENSDART00000111102	chondroitin polymerizing factor b [Source:ZFIN;Acc:ZDB-GENE-100504-1]	ENSDARG00000078037
6_13715869_13716406	538	0.174	0.00022	0.174	0.000484	0.00171307	0.00351239	down	down		Promoter	ENSDART00000043522	transmembrane protein 198b [Source:ZFIN;Acc:ZDB-GENE-050809-123]	ENSDARG00000034685
6_299113_299933	821	0.174	0.00022	0.174	0.000484	0.00171307	0.00351239	down	down		Promoter	ENSDART00000103373	phosphodiesterase 6H, cGMP-specific, cone, gamma [Source:ZFIN;Acc:ZDB-GENE-040426-1754]	ENSDARG00000070439
6_49456569_49456898	330	0.174	0.00022	0.174	0.000484	0.00171307	0.00351239	down	down		Promoter	ENSDART00000010499	ribosomal protein, large P2 [Source:ZFIN;Acc:ZDB-GENE-031018-2]	ENSDARG00000022833
6_7446595_7447655	1061	0.174	0.00022	0.174	0.000484	0.00171307	0.00351239	down	down		Promoter	ENSDART00000057823	proliferation-associated 2G4, a [Source:ZFIN;Acc:ZDB-GENE-030616-161]	ENSDARG00000039578
7_7741864_7742365	502	0.174	0.00022	0.174	0.000484	0.00171307	0.00351239	down	down		Promoter	ENSDART00000126692	kinesin light chain 2 [Source:ZFIN;Acc:ZDB-GENE-030131-2670]	ENSDARG00000075485
8_13972703_13973127	425	0.174	0.00022	0.174	0.000484	0.00171307	0.00351239	down	down		Promoter	ENSDART00000131826	si:ch211-126g16.3 [Source:ZFIN;Acc:ZDB-GENE-081104-109]	ENSDARG00000086350
8_35477131_35477879	749	0.174	0.00022	0.174	0.000484	0.00171307	0.00351239	down	down		Promoter	ENSDART00000138781	zgc:77614 [Source:ZFIN;Acc:ZDB-GENE-040426-1844]	ENSDARG00000094864
9_24182825_24183487	663	0.174	0.00022	0.174	0.000484	0.00171307	0.00351239	down	down		Promoter	ENSDART00000105623	LY6/PLAUR domain containing 6B [Source:ZFIN;Acc:ZDB-GENE-050522-38]	ENSDARG00000077643
9_47792336_47792771	436	0.174	0.00022	0.174	0.000484	0.00171307	0.00351239	down	down		Promoter	ENSDART00000025256	insulin-like growth factor binding protein 2b [Source:ZFIN;Acc:ZDB-GENE-090107-3]	ENSDARG00000031422
9_57631292_57632094	803	0.174	0.00022	0.174	0.000484	0.00171307	0.00351239	down	down		Promoter	ENSDART00000007982	septin 10 [Source:ZFIN;Acc:ZDB-GENE-050417-3]	ENSDARG00000088424
1_33876160_33876708	549	0.185	0.00041	0.185	0.000462	0.00257138	0.00351239	down	down		Promoter	ENSDART00000147201	solute carrier family 5 (choline transporter), member 7 [Source:HGNC Symbol;Acc:14025]	ENSDARG00000074860
1_45167862_45168367	506	0.185	0.00041	0.185	0.000462	0.00257138	0.00351239	down	down		Promoter	ENSDART00000139036	polymerase (DNA-directed), delta 4, accessory subunit [Source:HGNC Symbol;Acc:14106]	ENSDARG00000079632
1_47474977_47475456	480	0.185	0.00041	0.185	0.000462	0.00257138	0.00351239	down	down		Promoter	ENSDART00000053097	pbx/knotted 1 homeobox 1.2 [Source:ZFIN;Acc:ZDB-GENE-020123-1]	ENSDARG00000036542
1_47953629_47954134	506	0.185	0.00041	0.185	0.000462	0.00257138	0.00351239	down	down		Promoter	ENSDART00000015046	follistatin-like 1a [Source:ZFIN;Acc:ZDB-GENE-030131-4148]	ENSDARG00000015559
10_3432992_3433602	611	0.185	0.00041	0.185	0.000462	0.00257138	0.00351239	down	down		Promoter	ENSDART00000081599	protein tyrosine phosphatase, non-receptor type 11, a [Source:ZFIN;Acc:ZDB-GENE-030131-5911]	ENSDARG00000020334
11_2679473_2680163	691	0.185	0.00041	0.185	0.000462	0.00257138	0.00351239	down	down		Promoter	ENSDART00000082511	Uncharacterized protein [Source:UniProtKB/TrEMBL;Acc:E7F986]	ENSDARG00000059399
11_5619325_5620043	719	0.185	0.00041	0.185	0.000462	0.00257138	0.00351239	down	down		Promoter	ENSDART00000105622	Uncharacterized protein [Source:UniProtKB/TrEMBL;Acc:E7F2T4]	ENSDARG00000088017
12_1300488_1301197	710	0.185	0.00041	0.185	0.000462	0.00257138	0.00351239	down	down		Promoter	ENSDART00000109523	Uncharacterized protein [Source:UniProtKB/TrEMBL;Acc:E7F3X4]	ENSDARG00000075313
12_45300177_45300587	411	0.185	0.00041	0.185	0.000462	0.00257138	0.00351239	down	down		Promoter	ENSDART00000004122	protein tyrosine phosphatase, receptor type, E, a [Source:ZFIN;Acc:ZDB-GENE-100714-1]	ENSDARG00000015891
13_23819917_23820366	450	0.185	0.00041	0.185	0.000462	0.00257138	0.00351239	down	down		Promoter	ENSDART00000116033
13_46589015_46589662	648	0.185	0.00041	0.185	0.000462	0.00257138	0.00351239	down	down		Promoter	ENSDART00000144527
13_535958_536604	647	0.185	0.00041	0.185	0.000462	0.00257138	0.00351239	down	down		Promoter	ENSDART00000097561	Kv channel interacting protein 2 [Source:HGNC Symbol;Acc:15522]	ENSDARG00000043993
13_54054028_54054663	636	0.185	0.00041	0.185	0.000462	0.00257138	0.00351239	down	down		Promoter	ENSDART00000017456	ventral expressed homeobox [Source:ZFIN;Acc:ZDB-GENE-010108-2]	ENSDARG00000017164
14_21994907_21996754	1848	0.185	0.00041	0.185	0.000462	0.00257138	0.00351239	down	down		Promoter	ENSDART00000136500
14_49399267_49399578	312	0.185	0.00041	0.185	0.000462	0.00257138	0.00351239	down	down		Promoter	ENSDART00000133947
14_498032_498890	859	0.185	0.00041	0.185	0.000462	0.00257138	0.00351239	down	down	Y	Promoter	ENSDART00000115093	ankyrin repeat domain 50 [Source:HGNC Symbol;Acc:29223]	ENSDARG00000079065
14_53500478_53502127	1650	0.185	0.00041	0.185	0.000462	0.00257138	0.00351239	down	down		Promoter	ENSDART00000105466	transcription elongation regulator 1a (CA150) [Source:ZFIN;Acc:ZDB-GENE-030131-1791]	ENSDARG00000025314
15_17154724_17155492	769	0.185	0.00041	0.185	0.000462	0.00257138	0.00351239	down	down		Promoter	ENSDART00000141508	bloodthirsty-related gene family, member 16 [Source:ZFIN;Acc:ZDB-GENE-060929-1066]	ENSDARG00000028850
16_14012600_14013607	1008	0.185	0.00041	0.185	0.000462	0.00257138	0.00351239	down	down		Promoter	ENSDART00000133430	zgc:92606 [Source:ZFIN;Acc:ZDB-GENE-040718-462]	ENSDARG00000040971
16_14496259_14496826	568	0.185	0.00041	0.185	0.000462	0.00257138	0.00351239	down	down		Promoter	ENSDART00000145583
16_25324317_25325346	1030	0.185	0.00041	0.185	0.000462	0.00257138	0.00351239	down	down		Promoter	ENSDART00000121607	ephrin A3b [Source:ZFIN;Acc:ZDB-GENE-011108-1]	ENSDARG00000032485
16_27498495_27499024	530	0.185	0.00041	0.185	0.000462	0.00257138	0.00351239	down	down		Promoter	ENSDART00000058938	F-box protein 32 [Source:ZFIN;Acc:ZDB-GENE-040426-1040]	ENSDARG00000040277
16_32432045_32432534	490	0.185	0.00041	0.185	0.000462	0.00257138	0.00351239	down	down		Promoter	ENSDART00000120972
16_45711245_45711766	522	0.185	0.00041	0.185	0.000462	0.00257138	0.00351239	down	down		Promoter	ENSDART00000102345	thioredoxin interacting protein b [Source:ZFIN;Acc:ZDB-GENE-040917-1]	ENSDARG00000070000
17_2362511_2362909	399	0.185	0.00041	0.185	0.000462	0.00257138	0.00351239	down	down		Promoter	ENSDART00000126234	zona pellucida glycoprotein 3, tandem duplicate 2 [Source:ZFIN;Acc:ZDB-GENE-050626-121]	ENSDARG00000087209
17_31543207_31544497	1291	0.185	0.00041	0.185	0.000462	0.00257138	0.00351239	down	down		Promoter	ENSDART00000062907	leukocyte tyrosine kinase [Source:ZFIN;Acc:ZDB-GENE-030616-115]	ENSDARG00000042861
18_21108932_21109489	558	0.185	0.00041	0.185	0.000462	0.00257138	0.00351239	down	down		Promoter	ENSDART00000100830	HYDIN, axonemal central pair apparatus protein [Source:ZFIN;Acc:ZDB-GENE-050419-219]	ENSDARG00000056764
18_31398543_31398953	411	0.185	0.00041	0.185	0.000462	0.00257138	0.00351239	down	down		Promoter	ENSDART00000151519	si:ch73-125k17.2 [Source:ZFIN;Acc:ZDB-GENE-120215-164]	ENSDARG00000088029
19_11140987_11141614	628	0.185	0.00041	0.185	0.000462	0.00257138	0.00351239	down	down		Promoter	ENSDART00000091926	Uncharacterized protein [Source:UniProtKB/TrEMBL;Acc:E7EYK4]	ENSDARG00000019093
19_1245641_1247036	1396	0.185	0.00041	0.185	0.000462	0.00257138	0.00351239	down	down	Y	Promoter	ENSDART00000033127	scratch homolog 1, zinc finger protein a (Drosophila) [Source:ZFIN;Acc:ZDB-GENE-080219-30]	ENSDARG00000023261
19_19187766_19188230	465	0.185	0.00041	0.185	0.000462	0.00257138	0.00351239	down	down		Promoter	ENSDART00000141968	even-skipped homeobox 1 [Source:ZFIN;Acc:ZDB-GENE-980526-364]	ENSDARG00000005628
19_22545899_22547082	1184	0.185	0.00041	0.185	0.000462	0.00257138	0.00351239	down	down		Promoter	ENSDART00000100181	sal-like 3b (Drosophila) [Source:ZFIN;Acc:ZDB-GENE-030131-9140]	ENSDARG00000057586
19_31100612_31101054	443	0.185	0.00041	0.185	0.000462	0.00257138	0.00351239	down	down		Promoter	ENSDART00000024292	taxilin alpha [Source:ZFIN;Acc:ZDB-GENE-030131-2900]	ENSDARG00000077037
19_31597338_31597700	363	0.185	0.00041	0.185	0.000462	0.00257138	0.00351239	down	down		Promoter	ENSDART00000137381
19_398356_399134	779	0.185	0.00041	0.185	0.000462	0.00257138	0.00351239	down	down		Promoter	ENSDART00000136361	sema domain, transmembrane domain (TM), and cytoplasmic domain, (semaphorin) 6D [Source:ZFIN;Acc:ZDB-GENE-040426-1933]	ENSDARG00000002748
19_43610877_43611481	605	0.185	0.00041	0.185	0.000462	0.00257138	0.00351239	down	down		Promoter	ENSDART00000150949	nuclear transcription factor Y, gamma [Source:ZFIN;Acc:ZDB-GENE-030131-2165]	ENSDARG00000070151
19_853609_854268	660	0.185	0.00041	0.185	0.000462	0.00257138	0.00351239	down	down	Y	Promoter	ENSDART00000007206	eomesodermin homolog a [Source:ZFIN;Acc:ZDB-GENE-001228-1]	ENSDARG00000006640
2_18447468_18448228	761	0.185	0.00041	0.185	0.000462	0.00257138	0.00351239	down	down		Promoter	ENSDART00000139533
2_23755665_23756193	529	0.185	0.00041	0.185	0.000462	0.00257138	0.00351239	down	down		Promoter	ENSDART00000135002
2_30373294_30374166	873	0.185	0.00041	0.185	0.000462	0.00257138	0.00351239	down	down		Promoter	ENSDART00000145405	catenin (cadherin-associated protein), delta 2b [Source:ZFIN;Acc:ZDB-GENE-070912-532]	ENSDARG00000003779
2_33324_35018	1695	0.185	0.00041	0.185	0.000462	0.00257138	0.00351239	down	down		Promoter	ENSDART00000123041	Uncharacterized protein [Source:UniProtKB/TrEMBL;Acc:F1QA85]	ENSDARG00000087773
2_43686081_43686685	605	0.185	0.00041	0.185	0.000462	0.00257138	0.00351239	down	down		Promoter	ENSDART00000148454	integrin, beta 1b.1 [Source:ZFIN;Acc:ZDB-GENE-060803-3]	ENSDARG00000053232
2_6778814_6779775	962	0.185	0.00041	0.185	0.000462	0.00257138	0.00351239	down	down		Promoter	ENSDART00000022963	CDC14 cell division cycle 14 homolog A, a [Source:ZFIN;Acc:ZDB-GENE-040426-1214]	ENSDARG00000013858
20_15962872_15965829	2958	0.185	0.00041	0.185	0.000462	0.00257138	0.00351239	down	down		Promoter	ENSDART00000152354	family with sequence similarity 20, member B (H. sapiens) [Source:ZFIN;Acc:ZDB-GENE-040724-125]	ENSDARG00000008573
20_26919104_26919759	656	0.185	0.00041	0.185	0.000462	0.00257138	0.00351239	down	down		Promoter	ENSDART00000133293		ENSDARG00000095125
20_53007419_53007757	339	0.185	0.00041	0.185	0.000462	0.00257138	0.00351239	down	down		Promoter	ENSDART00000146716	si:ch211-221n20.4 [Source:ZFIN;Acc:ZDB-GENE-041014-222]	ENSDARG00000092572
20_54306427_54307008	582	0.185	0.00041	0.185	0.000462	0.00257138	0.00351239	down	down		Promoter	ENSDART00000052781	protein phosphatase 2, regulatory subunit B', gamma b [Source:ZFIN;Acc:ZDB-GENE-041014-4]	ENSDARG00000031200
21_11955343_11955825	483	0.185	0.00041	0.185	0.000462	0.00257138	0.00351239	down	down		Promoter	ENSDART00000111666	neural proliferation, differentiation and control, 1 [Source:ZFIN;Acc:ZDB-GENE-031204-31]	ENSDARG00000074697
21_17247173_17248051	879	0.185	0.00041	0.185	0.000462	0.00257138	0.00351239	down	down		Promoter	ENSDART00000112113	si:dkey-112m2.1 [Source:ZFIN;Acc:ZDB-GENE-091116-15]	ENSDARG00000074863
21_34261989_34262660	672	0.185	0.00041	0.185	0.000462	0.00257138	0.00351239	down	down		Promoter	ENSDART00000076750	interleukin 12B, b [Source:ZFIN;Acc:ZDB-GENE-030131-7937]	ENSDARG00000054542
21_37861990_37862738	749	0.185	0.00041	0.185	0.000462	0.00257138	0.00351239	down	down		Promoter	ENSDART00000056878	tnf receptor-associated factor 4b [Source:ZFIN;Acc:ZDB-GENE-040305-2]	ENSDARG00000038964
22_8777545_8778036	492	0.185	0.00041	0.185	0.000462	0.00257138	0.00351239	down	down		Promoter	ENSDART00000140720	si:dkey-182g1.2 [Source:ZFIN;Acc:ZDB-GENE-060503-619]	ENSDARG00000052680
22_9202365_9202793	429	0.185	0.00041	0.185	0.000462	0.00257138	0.00351239	down	down		Promoter	ENSDART00000139587	si:ch211-250k18.6 [Source:ZFIN;Acc:ZDB-GENE-070912-245]	ENSDARG00000093964
23_12903144_12904154	1011	0.185	0.00041	0.185	0.000462	0.00257138	0.00351239	down	down		Promoter	ENSDART00000146640	6-phosphofructo-2-kinase/fructose-2,6-biphosphatase 1 [Source:HGNC Symbol;Acc:8872]	ENSDARG00000074457
23_16838109_16838969	861	0.185	0.00041	0.185	0.000462	0.00257138	0.00351239	down	down		Promoter	ENSDART00000136496	syndecan binding protein (syntenin) 2 [Source:ZFIN;Acc:ZDB-GENE-030131-3727]	ENSDARG00000012513
23_1728508_1729674	1167	0.185	0.00041	0.185	0.000462	0.00257138	0.00351239	down	down		Promoter	ENSDART00000099024	Rab geranylgeranyltransferase, alpha subunit [Source:ZFIN;Acc:ZDB-GENE-060929-1042]	ENSDARG00000061024
23_23078329_23079231	903	0.185	0.00041	0.185	0.000462	0.00257138	0.00351239	down	down		Promoter	ENSDART00000142085	arginine-glutamic acid dipeptide (RE) repeats a [Source:ZFIN;Acc:ZDB-GENE-060718-1]	ENSDARG00000077353
23_39421585_39422051	467	0.185	0.00041	0.185	0.000462	0.00257138	0.00351239	down	down		Promoter	ENSDART00000101344	potassium voltage-gated channel, subfamily G, member 1 [Source:ZFIN;Acc:ZDB-GENE-080220-5]	ENSDARG00000061493
23_44015964_44016497	534	0.185	0.00041	0.185	0.000462	0.00257138	0.00351239	down	down		Promoter	ENSDART00000017375	cyclic nucleotide gated channel alpha 1 [Source:ZFIN;Acc:ZDB-GENE-110408-39]	ENSDARG00000012125
24_32991141_32991797	657	0.185	0.00041	0.185	0.000462	0.00257138	0.00351239	down	down		Promoter	ENSDART00000126912
25_24422768_24423407	640	0.185	0.00041	0.185	0.000462	0.00257138	0.00351239	down	down		Promoter	ENSDART00000147751	zgc:123060 [Source:ZFIN;Acc:ZDB-GENE-051120-156]	ENSDARG00000095051
25_28533914_28534314	401	0.185	0.00041	0.185	0.000462	0.00257138	0.00351239	down	down		Promoter	ENSDART00000123590	chromosome X open reading frame 38 [Source:HGNC Symbol;Acc:28589]	ENSDARG00000089227
25_37409742_37410471	730	0.185	0.00041	0.185	0.000462	0.00257138	0.00351239	down	down		Promoter	ENSDART00000103027	si:ch211-113a14.28 [Source:ZFIN;Acc:ZDB-GENE-121214-199]	ENSDARG00000070297
3_1787444_1788071	628	0.185	0.00041	0.185	0.000462	0.00257138	0.00351239	down	down		Promoter	ENSDART00000109912	si:ch1073-464p5.5 [Source:ZFIN;Acc:ZDB-GENE-091116-35]	ENSDARG00000079544
3_4867357_4867877	521	0.185	0.00041	0.185	0.000462	0.00257138	0.00351239	down	down		Promoter	ENSDART00000057846	Uncharacterized protein [Source:UniProtKB/TrEMBL;Acc:F1Q842]	ENSDARG00000079245
3_61187534_61188120	587	0.185	0.00041	0.185	0.000462	0.00257138	0.00351239	down	down		Promoter	ENSDART00000126947	Uncharacterized protein [Source:UniProtKB/TrEMBL;Acc:E7FAI9]	ENSDARG00000089414
4_1282416_1282896	481	0.185	0.00041	0.185	0.000462	0.00257138	0.00351239	down	down	Y	Promoter	ENSDART00000077965	pleiotrophin [Source:ZFIN;Acc:ZDB-GENE-030624-1]	ENSDARG00000045798
4_35027977_35028460	484	0.185	0.00041	0.185	0.000462	0.00257138	0.00351239	down	down		Promoter	ENSDART00000119831
4_55991890_55992358	469	0.185	0.00041	0.185	0.000462	0.00257138	0.00351239	down	down		Promoter	ENSDART00000150348	si:ch211-178j18.4 [Source:ZFIN;Acc:ZDB-GENE-110914-148]	ENSDARG00000096024
5_13726560_13727877	1318	0.185	0.00041	0.185	0.000462	0.00257138	0.00351239	down	down		Promoter	ENSDART00000142258	si:ch73-263f13.1 [Source:ZFIN;Acc:ZDB-GENE-081104-271]	ENSDARG00000094172
5_24792943_24793658	716	0.185	0.00041	0.185	0.000462	0.00257138	0.00351239	down	down		Promoter	ENSDART00000128271	si:dkey-114c15.7 [Source:ZFIN;Acc:ZDB-GENE-110411-102]	ENSDARG00000089271
6_33379613_33380367	755	0.185	0.00041	0.185	0.000462	0.00257138	0.00351239	down	down		Promoter	ENSDART00000121338
7_19768522_19769234	713	0.185	0.00041	0.185	0.000462	0.00257138	0.00351239	down	down		Promoter	ENSDART00000108938	Uncharacterized protein [Source:UniProtKB/TrEMBL;Acc:E7EZ34]	ENSDARG00000078801
7_29717579_29717998	420	0.185	0.00041	0.185	0.000462	0.00257138	0.00351239	down	down		Promoter	ENSDART00000144896	serine/threonine kinase 33 [Source:ZFIN;Acc:ZDB-GENE-040724-242]	ENSDARG00000054318
7_36426717_36427299	583	0.185	0.00041	0.185	0.000462	0.00257138	0.00351239	down	down		Promoter	ENSDART00000120043
7_4484614_4485186	573	0.185	0.00041	0.185	0.000462	0.00257138	0.00351239	down	down		Promoter	ENSDART00000097953	Uncharacterized protein [Source:UniProtKB/TrEMBL;Acc:E7FBJ3]	ENSDARG00000055142
7_65849289_65850022	734	0.185	0.00041	0.185	0.000462	0.00257138	0.00351239	down	down		Promoter	ENSDART00000126930	sema domain, immunoglobulin domain (Ig), transmembrane domain (TM) and short cytoplasmic domain, (semaphorin) 4F [Source:HGNC Symbol;Acc:10734]	ENSDARG00000079014
8_11475126_11475829	704	0.185	0.00041	0.185	0.000462	0.00257138	0.00351239	down	down		Promoter	ENSDART00000002164	unc-45 homolog B (C. elegans) [Source:ZFIN;Acc:ZDB-GENE-020919-3]	ENSDARG00000008433
8_31850540_31851443	904	0.185	0.00041	0.185	0.000462	0.00257138	0.00351239	down	down		Promoter	ENSDART00000128184
8_9692390_9693061	672	0.185	0.00041	0.185	0.000462	0.00257138	0.00351239	down	down		Promoter	ENSDART00000064090	pregnancy up-regulated non-ubiquitously expressed CaM kinase [Source:ZFIN;Acc:ZDB-GENE-081105-127]	ENSDARG00000043648
9_14418163_14418558	396	0.185	0.00041	0.185	0.000462	0.00257138	0.00351239	down	down		Promoter	ENSDART00000144491
9_23345125_23345852	728	0.185	0.00041	0.185	0.000462	0.00257138	0.00351239	down	down		Promoter	ENSDART00000108719	crystallin, gamma M2d10 [Source:ZFIN;Acc:ZDB-GENE-071004-96]	ENSDARG00000087765
1_29321769_29323134	1366	0.197	0.000766	0.197	0.00085	0.00420871	0.00501532	down	down		Promoter	ENSDART00000152416
1_33752783_33753359	577	0.197	0.000766	0.197	0.00085	0.00420871	0.00501532	down	down		Promoter	ENSDART00000117082
1_40622921_40623355	435	0.197	0.000766	0.197	0.00085	0.00420871	0.00501532	down	down		Promoter	ENSDART00000077796	si:dkey-44g23.9 [Source:ZFIN;Acc:ZDB-GENE-050208-636]	ENSDARG00000055453
1_51821220_51821830	611	0.197	0.000766	0.197	0.00085	0.00420871	0.00501532	down	down		Promoter	ENSDART00000063938	microtubule associated serine/threonine kinase 1 [Source:HGNC Symbol;Acc:19034]	ENSDARG00000027497
1_9983816_9984300	485	0.197	0.000766	0.197	0.00085	0.00420871	0.00501532	down	down		Promoter	ENSDART00000139749	si:ch73-222h13.1 [Source:ZFIN;Acc:ZDB-GENE-090313-144]	ENSDARG00000087107
10_15338564_15338984	421	0.197	0.000766	0.197	0.00085	0.00420871	0.00501532	down	down		Promoter	ENSDART00000136239	potassium channel, subfamily V, member 2a [Source:ZFIN;Acc:ZDB-GENE-091117-27]	ENSDARG00000076644
10_17238181_17238825	645	0.197	0.000766	0.197	0.00085	0.00420871	0.00501532	down	down		Promoter	ENSDART00000126832	Uncharacterized protein [Source:UniProtKB/TrEMBL;Acc:E7F0Z9]	ENSDARG00000086274
10_35895032_35895810	779	0.197	0.000766	0.197	0.00085	0.00420871	0.00501532	down	down		Promoter	ENSDART00000123957	doublecortin-like kinase 1a [Source:ZFIN;Acc:ZDB-GENE-061013-124]	ENSDARG00000018856
10_39418538_39419231	694	0.197	0.000766	0.197	0.00085	0.00420871	0.00501532	down	down		Promoter	ENSDART00000118670
10_9502902_9503308	407	0.197	0.000766	0.197	0.00085	0.00420871	0.00501532	down	down		Promoter	ENSDART00000041382	MORN repeat containing 5 [Source:ZFIN;Acc:ZDB-GENE-050522-267]	ENSDARG00000033610
11_41661700_41662102	403	0.197	0.000766	0.197	0.00085	0.00420871	0.00501532	down	down		Promoter	ENSDART00000122225
11_41723332_41723733	402	0.197	0.000766	0.197	0.00085	0.00420871	0.00501532	down	down		Promoter	ENSDART00000139009	tripartite motif containing 62 [Source:HGNC Symbol;Acc:25574]	ENSDARG00000095536
11_43663136_43664244	1109	0.197	0.000766	0.197	0.00085	0.00420871	0.00501532	down	down		Promoter	ENSDART00000019008	Uncharacterized protein [Source:UniProtKB/TrEMBL;Acc:E7F3S8]	ENSDARG00000008473
11_5580823_5581370	548	0.197	0.000766	0.197	0.00085	0.00420871	0.00501532	down	down		Promoter	ENSDART00000027850	solute carrier family 35, member E1 [Source:ZFIN;Acc:ZDB-GENE-040426-2033]	ENSDARG00000011945
12_32367700_32368201	502	0.197	0.000766	0.197	0.00085	0.00420871	0.00501532	down	down		Promoter	ENSDART00000066259	potassium channel, subfamily K, member 1a [Source:ZFIN;Acc:ZDB-GENE-070620-26]	ENSDARG00000045067
12_36219798_36220188	391	0.197	0.000766	0.197	0.00085	0.00420871	0.00501532	down	down		Promoter	ENSDART00000153345
12_4162746_4163355	610	0.197	0.000766	0.197	0.00085	0.00420871	0.00501532	down	down		Promoter	ENSDART00000108699	cytochrome C oxidase assembly factor 3 [Source:ZFIN;Acc:ZDB-GENE-060810-187]	ENSDARG00000074312
12_4397515_4398317	803	0.197	0.000766	0.197	0.00085	0.00420871	0.00501532	down	down		Promoter	ENSDART00000152728
12_8161256_8161971	716	0.197	0.000766	0.197	0.00085	0.00420871	0.00501532	down	down		Promoter	ENSDART00000152564	phytanoyl-CoA 2-hydroxylase interacting protein-like b [Source:ZFIN;Acc:ZDB-GENE-040927-27]	ENSDARG00000070498
13_293241_293951	711	0.197	0.000766	0.197	0.00085	0.00420871	0.00501532	down	down		Promoter	ENSDART00000129775	Uncharacterized protein [Source:UniProtKB/TrEMBL;Acc:F1R2Q0]	ENSDARG00000087604
13_31250042_31250766	725	0.197	0.000766	0.197	0.00085	0.00420871	0.00501532	down	down		Promoter	ENSDART00000137709	WDFY family member 4 [Source:ZFIN;Acc:ZDB-GENE-090313-322]	ENSDARG00000077009
13_3169400_3170261	862	0.197	0.000766	0.197	0.00085	0.00420871	0.00501532	down	down		Promoter	ENSDART00000146240	Parkinson disease (autosomal recessive, juvenile) 2, parkin [Source:ZFIN;Acc:ZDB-GENE-050417-109]	ENSDARG00000021555
13_31914383_31915017	635	0.197	0.000766	0.197	0.00085	0.00420871	0.00501532	down	down		Promoter	ENSDART00000085989	TRM5 tRNA methyltransferase 5 homolog (S. cerevisiae) [Source:ZFIN;Acc:ZDB-GENE-030131-5978]	ENSDARG00000069278
14_2730158_2730557	400	0.197	0.000766	0.197	0.00085	0.00420871	0.00501532	down	down		Promoter	ENSDART00000129063	protocadherin 2 alpha b 7 [Source:ZFIN;Acc:ZDB-GENE-041118-6]	ENSDARG00000088752
14_33355863_33356843	981	0.197	0.000766	0.197	0.00085	0.00420871	0.00501532	down	down		Promoter	ENSDART00000148830	MCF.2 cell line derived transforming sequence a [Source:ZFIN;Acc:ZDB-GENE-030616-52]	ENSDARG00000022895
14_7331225_7332030	806	0.197	0.000766	0.197	0.00085	0.00420871	0.00501532	down	down		Promoter	ENSDART00000120934
15_14377925_14378274	350	0.197	0.000766	0.197	0.00085	0.00420871	0.00501532	down	down		Promoter	ENSDART00000106120	3-monooxygenase/tryptophan 5-monooxygenase activation protein, gamma polypeptide 2 [Source:ZFIN;Acc:ZDB-GENE-061023-2]	ENSDARG00000071658
15_1646192_1646596	405	0.197	0.000766	0.197	0.00085	0.00420871	0.00501532	down	down	Y	Promoter	ENSDART00000021299	NMD3 homolog (S. cerevisiae) [Source:ZFIN;Acc:ZDB-GENE-050320-149]	ENSDARG00000015676
15_2255973_2256607	635	0.197	0.000766	0.197	0.00085	0.00420871	0.00501532	down	down		Promoter	ENSDART00000119493
15_33596653_33597233	581	0.197	0.000766	0.197	0.00085	0.00420871	0.00501532	down	down		Promoter	ENSDART00000059978	Uncharacterized protein [Source:UniProtKB/TrEMBL;Acc:F1QNP5]	ENSDARG00000088520
16_10262018_10262520	503	0.197	0.000766	0.197	0.00085	0.00420871	0.00501532	down	down		Promoter	ENSDART00000120023
16_11938155_11938783	629	0.197	0.000766	0.197	0.00085	0.00420871	0.00501532	down	down		Promoter	ENSDART00000121358
16_26033373_26034056	684	0.197	0.000766	0.197	0.00085	0.00420871	0.00501532	down	down		Promoter	ENSDART00000134604
16_34329968_34330544	577	0.197	0.000766	0.197	0.00085	0.00420871	0.00501532	down	down		Promoter	ENSDART00000030282	glutathione S-transferase kappa 1 [Source:HGNC Symbol;Acc:16906]	ENSDARG00000056510
16_58191839_58192484	646	0.197	0.000766	0.197	0.00085	0.00420871	0.00501532	down	down		Promoter	ENSDART00000101209	F-box protein 43 [Source:ZFIN;Acc:ZDB-GENE-040426-1645]	ENSDARG00000052717
17_13624834_13625260	427	0.197	0.000766	0.197	0.00085	0.00420871	0.00501532	down	down		Promoter	ENSDART00000105175	leucine rich repeat and fibronectin type III domain containing 5 [Source:HGNC Symbol;Acc:20360]	ENSDARG00000071230
17_36060576_36061489	914	0.197	0.000766	0.197	0.00085	0.00420871	0.00501532	down	down		Promoter	ENSDART00000110040	SRY-box containing gene 11a [Source:ZFIN;Acc:ZDB-GENE-980526-395]	ENSDARG00000077811
17_38411824_38412219	396	0.197	0.000766	0.197	0.00085	0.00420871	0.00501532	down	down		Promoter	ENSDART00000075936	paired box gene 9 [Source:ZFIN;Acc:ZDB-GENE-980526-399]	ENSDARG00000053829
17_41115516_41116176	661	0.197	0.000766	0.197	0.00085	0.00420871	0.00501532	down	down		Promoter	ENSDART00000124715	im:7151068 [Source:ZFIN;Acc:ZDB-GENE-041111-271]	ENSDARG00000089862
18_17197203_17197712	510	0.197	0.000766	0.197	0.00085	0.00420871	0.00501532	down	down		Promoter	ENSDART00000147839	nucleoporin 93 [Source:ZFIN;Acc:ZDB-GENE-990415-46]	ENSDARG00000003487
18_40172462_40173208	747	0.197	0.000766	0.197	0.00085	0.00420871	0.00501532	down	down		Promoter	ENSDART00000097547	transient receptor potential cation channel, subfamily C, member 6b [Source:ZFIN;Acc:ZDB-GENE-081030-19]	ENSDARG00000067730
18_5102022_5102398	377	0.197	0.000766	0.197	0.00085	0.00420871	0.00501532	down	down		Promoter	ENSDART00000122307	glycine cleavage system protein H (aminomethyl carrier) [Source:HGNC Symbol;Acc:4208]	ENSDARG00000091655
18_6806194_6806912	719	0.197	0.000766	0.197	0.00085	0.00420871	0.00501532	down	down		Promoter	ENSDART00000041429	GLI pathogenesis-related 1b [Source:ZFIN;Acc:ZDB-GENE-040426-1459]	ENSDARG00000030078
19_32589873_32590206	334	0.197	0.000766	0.197	0.00085	0.00420871	0.00501532	down	down		Promoter	ENSDART00000040810	ADP-ribosylation factor-like 4ab [Source:ZFIN;Acc:ZDB-GENE-030219-167]	ENSDARG00000033182
19_397189_398025	837	0.197	0.000766	0.197	0.00085	0.00420871	0.00501532	down	down		Promoter	ENSDART00000136361	sema domain, transmembrane domain (TM), and cytoplasmic domain, (semaphorin) 6D [Source:ZFIN;Acc:ZDB-GENE-040426-1933]	ENSDARG00000002748
19_44605009_44605412	404	0.197	0.000766	0.197	0.00085	0.00420871	0.00501532	down	down		Promoter	ENSDART00000038230	small nuclear ribonucleoprotein 40 (U5) [Source:ZFIN;Acc:ZDB-GENE-040426-978]	ENSDARG00000023160
19_4543795_4544230	436	0.197	0.000766	0.197	0.00085	0.00420871	0.00501532	down	down		Promoter	ENSDART00000057652	Uncharacterized protein [Source:UniProtKB/TrEMBL;Acc:E7FB02]	ENSDARG00000039462
19_48408078_48409039	962	0.197	0.000766	0.197	0.00085	0.00420871	0.00501532	down	down		Promoter	ENSDART00000123932	vacuolar protein sorting 28 (yeast) [Source:ZFIN;Acc:ZDB-GENE-040426-1527]	ENSDARG00000045949
19_7849100_7849497	398	0.197	0.000766	0.197	0.00085	0.00420871	0.00501532	down	down		Promoter	ENSDART00000151138	collagen type XI alpha-2 [Source:ZFIN;Acc:ZDB-GENE-000208-23]	ENSDARG00000012422
2_1062963_1064389	1427	0.197	0.000766	0.197	0.00085	0.00420871	0.00501532	down	down		Promoter	ENSDART00000019733	interferon regulatory factor 4a [Source:ZFIN;Acc:ZDB-GENE-070912-330]	ENSDARG00000006560
2_2911315_2911839	525	0.197	0.000766	0.197	0.00085	0.00420871	0.00501532	down	down		Promoter	ENSDART00000127523	aquaporin 1a, tandem duplicate 2 [Source:ZFIN;Acc:ZDB-GENE-100409-1]	ENSDARG00000091027
2_37188580_37188987	408	0.197	0.000766	0.197	0.00085	0.00420871	0.00501532	down	down		Promoter	ENSDART00000139983	si:dkey-57k2.6 [Source:ZFIN;Acc:ZDB-GENE-070912-558]	ENSDARG00000095608
2_4171689_4172499	811	0.197	0.000766	0.197	0.00085	0.00420871	0.00501532	down	down		Promoter	ENSDART00000081833	matrix metallopeptidase 16b (membrane-inserted) [Source:ZFIN;Acc:ZDB-GENE-061009-22]	ENSDARG00000058876
2_54128437_54129050	614	0.197	0.000766	0.197	0.00085	0.00420871	0.00501532	down	down		Promoter	ENSDART00000111215	Uncharacterized protein [Source:UniProtKB/TrEMBL;Acc:F1QS37]	ENSDARG00000079988
20_203370_203957	588	0.197	0.000766	0.197	0.00085	0.00420871	0.00501532	down	down	Y	Promoter	ENSDART00000064546	si:ch211-241j12.3 [Source:ZFIN;Acc:ZDB-GENE-040724-72]	ENSDARG00000043963
20_26566235_26567177	943	0.197	0.000766	0.197	0.00085	0.00420871	0.00501532	down	down		Promoter	ENSDART00000045397	syntaxin 11b, tandem duplicate 1 [Source:ZFIN;Acc:ZDB-GENE-040426-1893]	ENSDARG00000029290
20_31821199_31821876	678	0.197	0.000766	0.197	0.00085	0.00420871	0.00501532	down	down		Promoter	ENSDART00000139417	syntaxin binding protein 5a (tomosyn) [Source:ZFIN;Acc:ZDB-GENE-041001-161]	ENSDARG00000002656
20_32561274_32561788	515	0.197	0.000766	0.197	0.00085	0.00420871	0.00501532	down	down		Promoter	ENSDART00000147319	sex comb on midleg-like 4 (Drosophila) [Source:ZFIN;Acc:ZDB-GENE-041210-338]	ENSDARG00000017266
21_28133556_28134248	693	0.197	0.000766	0.197	0.00085	0.00420871	0.00501532	down	down		Promoter	ENSDART00000098696	neuregulin 2a [Source:ZFIN;Acc:ZDB-GENE-070615-10]	ENSDARG00000077818
21_31105124_31105934	811	0.197	0.000766	0.197	0.00085	0.00420871	0.00501532	down	down		Promoter	ENSDART00000110137	si:ch211-247j9.1 [Source:ZFIN;Acc:ZDB-GENE-091204-212]	ENSDARG00000079283
21_38540327_38540983	657	0.197	0.000766	0.197	0.00085	0.00420871	0.00501532	down	down		Promoter	ENSDART00000147718	PITP-less RdgB-like protein [Source:ZFIN;Acc:ZDB-GENE-000406-3]	ENSDARG00000089101
21_487964_488564	601	0.197	0.000766	0.197	0.00085	0.00420871	0.00501532	down	down		Promoter	ENSDART00000099252	Uncharacterized protein [Source:UniProtKB/TrEMBL;Acc:F1RA03]	ENSDARG00000068589
21_5025136_5025555	420	0.197	0.000766	0.197	0.00085	0.00420871	0.00501532	down	down		Promoter	ENSDART00000129355	calmodulin regulated spectrin-associated protein 1a [Source:ZFIN;Acc:ZDB-GENE-060518-4]	ENSDARG00000019208
21_6283243_6283690	448	0.197	0.000766	0.197	0.00085	0.00420871	0.00501532	down	down		Promoter	ENSDART00000132002	formin binding protein 1 [Source:HGNC Symbol;Acc:17069]	ENSDARG00000038219
21_7201159_7201936	778	0.197	0.000766	0.197	0.00085	0.00420871	0.00501532	down	down		Promoter	ENSDART00000114982	coagulation factor II (thrombin) receptor-like 1, tandem duplicate 2 [Source:ZFIN;Acc:ZDB-GENE-070615-24]	ENSDARG00000077540
22_10042103_10043041	939	0.197	0.000766	0.197	0.00085	0.00420871	0.00501532	down	down		Promoter	ENSDART00000105934	si:dkey-253d23.9 [Source:ZFIN;Acc:ZDB-GENE-050208-648]	ENSDARG00000074820
22_10321723_10322531	809	0.197	0.000766	0.197	0.00085	0.00420871	0.00501532	down	down		Promoter	ENSDART00000133244
22_1575032_1575443	412	0.197	0.000766	0.197	0.00085	0.00420871	0.00501532	down	down	Y	Promoter	ENSDART00000106374	si:dkey-4c15.16 [Source:ZFIN;Acc:ZDB-GENE-050420-215]	ENSDARG00000074868
22_24818609_24819403	795	0.197	0.000766	0.197	0.00085	0.00420871	0.00501532	down	down		Promoter	ENSDART00000121379
22_27411183_27411757	575	0.197	0.000766	0.197	0.00085	0.00420871	0.00501532	down	down		Promoter	ENSDART00000146806	si:dkey-44g23.9 [Source:ZFIN;Acc:ZDB-GENE-050208-636]	ENSDARG00000093878
23_1297103_1297796	694	0.197	0.000766	0.197	0.00085	0.00420871	0.00501532	down	down		Promoter	ENSDART00000105287	utrophin [Source:ZFIN;Acc:ZDB-GENE-070228-6]	ENSDARG00000095916
23_26365906_26366436	531	0.197	0.000766	0.197	0.00085	0.00420871	0.00501532	down	down		Promoter	ENSDART00000126299	GDP dissociation inhibitor 1 [Source:ZFIN;Acc:ZDB-GENE-050522-504]	ENSDARG00000056122
23_2801787_2802406	620	0.197	0.000766	0.197	0.00085	0.00420871	0.00501532	down	down		Promoter	ENSDART00000022045	phospholipase C, gamma 1 [Source:ZFIN;Acc:ZDB-GENE-030421-3]	ENSDARG00000038442
23_39420688_39421397	710	0.197	0.000766	0.197	0.00085	0.00420871	0.00501532	down	down		Promoter	ENSDART00000101344	potassium voltage-gated channel, subfamily G, member 1 [Source:ZFIN;Acc:ZDB-GENE-080220-5]	ENSDARG00000061493
23_44473266_44473833	568	0.197	0.000766	0.197	0.00085	0.00420871	0.00501532	down	down		Promoter	ENSDART00000097644	eph receptor B4b [Source:ZFIN;Acc:ZDB-GENE-990415-65]	ENSDARG00000027112
23_46158991_46160097	1107	0.197	0.000766	0.197	0.00085	0.00420871	0.00501532	down	down		Promoter	ENSDART00000123100	F-box and leucine-rich repeat protein 5 [Source:ZFIN;Acc:ZDB-GENE-030131-900]	ENSDARG00000043046
24_30882205_30882656	452	0.197	0.000766	0.197	0.00085	0.00420871	0.00501532	down	down		Promoter	ENSDART00000135094	palmdelphin b [Source:ZFIN;Acc:ZDB-GENE-090713-3]	ENSDARG00000034321
24_36615183_36615867	685	0.197	0.000766	0.197	0.00085	0.00420871	0.00501532	down	down		Promoter	ENSDART00000127491	suppression of tumorigenicity 18 (breast carcinoma) (zinc finger protein) [Source:ZFIN;Acc:ZDB-GENE-041008-121]	ENSDARG00000091410
24_8306409_8306815	407	0.197	0.000766	0.197	0.00085	0.00420871	0.00501532	down	down		Promoter	ENSDART00000149025	solute carrier family 35, member B3 [Source:ZFIN;Acc:ZDB-GENE-060312-46]	ENSDARG00000045437
25_35697895_35698870	976	0.197	0.000766	0.197	0.00085	0.00420871	0.00501532	down	down		Promoter	ENSDART00000087450	Kruppel-like factor 13 [Source:ZFIN;Acc:ZDB-GENE-060929-1274]	ENSDARG00000061368
25_37645802_37646143	342	0.197	0.000766	0.197	0.00085	0.00420871	0.00501532	down	down		Promoter	ENSDART00000111861	v-maf avian musculoaponeurotic fibrosarcoma oncogene homolog [Source:HGNC Symbol;Acc:6776]	ENSDARG00000076520
25_592036_592750	715	0.197	0.000766	0.197	0.00085	0.00420871	0.00501532	down	down	Y	Promoter	ENSDART00000123560	Uncharacterized protein [Source:UniProtKB/TrEMBL;Acc:F1QH62]	ENSDARG00000086187
3_15152391_15152987	597	0.197	0.000766	0.197	0.00085	0.00420871	0.00501532	down	down		Promoter	ENSDART00000136912	double C2-like domains, alpha [Source:HGNC Symbol;Acc:2985]	ENSDARG00000078736
3_3178069_3179734	1666	0.197	0.000766	0.197	0.00085	0.00420871	0.00501532	down	down		Promoter	ENSDART00000100079	Uncharacterized protein [Source:UniProtKB/TrEMBL;Acc:F1QSM2]	ENSDARG00000052872
3_41582330_41582876	547	0.197	0.000766	0.197	0.00085	0.00420871	0.00501532	down	down		Promoter	ENSDART00000074647	caspase recruitment domain family, member 11 [Source:HGNC Symbol;Acc:16393]	ENSDARG00000052741
3_49365148_49365832	685	0.197	0.000766	0.197	0.00085	0.00420871	0.00501532	down	down		Promoter	ENSDART00000146794	si:ch211-207b24.4 [Source:ZFIN;Acc:ZDB-GENE-100921-9]	ENSDARG00000042339
4_21173892_21174647	756	0.197	0.000766	0.197	0.00085	0.00420871	0.00501532	down	down		Promoter	ENSDART00000145180
4_25479486_25480064	579	0.197	0.000766	0.197	0.00085	0.00420871	0.00501532	down	down		Promoter	ENSDART00000114988	ST8 alpha-N-acetyl-neuraminide alpha-2,8-sialyltransferase 1 [Source:ZFIN;Acc:ZDB-GENE-051005-1]	ENSDARG00000074347
4_31307207_31308015	809	0.197	0.000766	0.197	0.00085	0.00420871	0.00501532	down	down	Y	Promoter	ENSDART00000117421
4_36135006_36136199	1194	0.197	0.000766	0.197	0.00085	0.00420871	0.00501532	down	down		Promoter	ENSDART00000150684	si:dkey-176f19.7 [Source:ZFIN;Acc:ZDB-GENE-110913-130]	ENSDARG00000096002
4_37948587_37949057	471	0.197	0.000766	0.197	0.00085	0.00420871	0.00501532	down	down		Promoter	ENSDART00000125085
4_4202068_4204123	2056	0.197	0.000766	0.197	0.00085	0.00420871	0.00501532	down	down		Promoter	ENSDART00000135048
4_44428921_44429457	537	0.197	0.000766	0.197	0.00085	0.00420871	0.00501532	down	down		Promoter	ENSDART00000139759	si:dkey-257e4.5 [Source:ZFIN;Acc:ZDB-GENE-110913-164]	ENSDARG00000092861
5_27855158_27855631	474	0.197	0.000766	0.197	0.00085	0.00420871	0.00501532	down	down		Promoter	ENSDART00000134432	occludin b [Source:ZFIN;Acc:ZDB-GENE-041212-43]	ENSDARG00000003091
5_40399155_40399791	637	0.197	0.000766	0.197	0.00085	0.00420871	0.00501532	down	down		Promoter	ENSDART00000123072
5_58988935_58989279	345	0.197	0.000766	0.197	0.00085	0.00420871	0.00501532	down	down		Promoter	ENSDART00000060989	crystallin, alpha B, b [Source:ZFIN;Acc:ZDB-GENE-040718-419]	ENSDARG00000052447
6_10775459_10776134	676	0.197	0.000766	0.197	0.00085	0.00420871	0.00501532	down	down		Promoter	ENSDART00000014521	limb and neural patterns b [Source:ZFIN;Acc:ZDB-GENE-030131-9455]	ENSDARG00000006639
6_12636345_12637512	1168	0.197	0.000766	0.197	0.00085	0.00420871	0.00501532	down	down		Promoter	ENSDART00000090174	dedicator of cytokinesis 9b [Source:ZFIN;Acc:ZDB-GENE-090916-2]	ENSDARG00000016311
6_32028623_32029075	453	0.197	0.000766	0.197	0.00085	0.00420871	0.00501532	down	down		Promoter	ENSDART00000065149	dedicator of cytokinesis 7 [Source:ZFIN;Acc:ZDB-GENE-050302-15]	ENSDARG00000078675
6_43379817_43380546	730	0.197	0.000766	0.197	0.00085	0.00420871	0.00501532	down	down		Promoter	ENSDART00000075521	zgc:113054 [Source:ZFIN;Acc:ZDB-GENE-050320-9]	ENSDARG00000053483
6_43977281_43978532	1252	0.197	0.000766	0.197	0.00085	0.00420871	0.00501532	down	down		Promoter	ENSDART00000075497	RING1 and YY1 binding protein b [Source:ZFIN;Acc:ZDB-GENE-061103-96]	ENSDARG00000053459
6_53842579_53843677	1099	0.197	0.000766	0.197	0.00085	0.00420871	0.00501532	down	down		Promoter	ENSDART00000057250	calcium channel, voltage-dependent, alpha 2/delta subunit 2 [Source:ZFIN;Acc:ZDB-GENE-050320-71]	ENSDARG00000039182
6_59696082_59696445	364	0.197	0.000766	0.197	0.00085	0.00420871	0.00501532	down	down		Promoter	ENSDART00000081275	SLAIN motif family, member 1b [Source:ZFIN;Acc:ZDB-GENE-080516-6]	ENSDARG00000077888
7_18295792_18296422	631	0.197	0.000766	0.197	0.00085	0.00420871	0.00501532	down	down		Promoter	ENSDART00000009769	Uncharacterized protein [Source:UniProtKB/TrEMBL;Acc:F1QM19]	ENSDARG00000069859
7_30694109_30694558	450	0.197	0.000766	0.197	0.00085	0.00420871	0.00501532	down	down		Promoter	ENSDART00000075757	general transcription factor IIA, 2 [Source:ZFIN;Acc:ZDB-GENE-050522-513]	ENSDARG00000053685
7_37167111_37167900	790	0.197	0.000766	0.197	0.00085	0.00420871	0.00501532	down	down		Promoter	ENSDART00000043857	iroquois homeobox protein 5a [Source:ZFIN;Acc:ZDB-GENE-010716-2]	ENSDARG00000034043
7_4318204_4318588	385	0.197	0.000766	0.197	0.00085	0.00420871	0.00501532	down	down		Promoter	ENSDART00000128040	Uncharacterized protein [Source:UniProtKB/TrEMBL;Acc:E7EYN0]	ENSDARG00000090645
7_60067281_60068372	1092	0.197	0.000766	0.197	0.00085	0.00420871	0.00501532	down	down		Promoter	ENSDART00000101731	La ribonucleoprotein domain family, member 7 [Source:ZFIN;Acc:ZDB-GENE-030131-6896]	ENSDARG00000017315
7_75235655_75236023	369	0.197	0.000766	0.197	0.00085	0.00420871	0.00501532	down	down		Promoter	ENSDART00000012070	adenylate cyclase activating polypeptide 1a [Source:ZFIN;Acc:ZDB-GENE-020809-4]	ENSDARG00000004015
7_8324152_8324883	732	0.197	0.000766	0.197	0.00085	0.00420871	0.00501532	down	down		Promoter	ENSDART00000036703	prefoldin subunit 2 [Source:ZFIN;Acc:ZDB-GENE-060519-27]	ENSDARG00000025391
8_2145872_2146532	661	0.197	0.000766	0.197	0.00085	0.00420871	0.00501532	down	down		Promoter	ENSDART00000128264	Uncharacterized protein [Source:UniProtKB/TrEMBL;Acc:E7F1J3]	ENSDARG00000091759
8_40421543_40422199	657	0.197	0.000766	0.197	0.00085	0.00420871	0.00501532	down	down		Promoter	ENSDART00000123106	zgc:174649 [Source:ZFIN;Acc:ZDB-GENE-080305-4]	ENSDARG00000074922
8_45107009_45107687	679	0.197	0.000766	0.197	0.00085	0.00420871	0.00501532	down	down		Promoter	ENSDART00000147872	si:ch211-233b23.4 [Source:ZFIN;Acc:ZDB-GENE-081104-523]	ENSDARG00000092308
8_53804168_53804854	687	0.197	0.000766	0.197	0.00085	0.00420871	0.00501532	down	down		Promoter	ENSDART00000147742	fibroblast growth factor receptor 1a [Source:ZFIN;Acc:ZDB-GENE-980526-255]	ENSDARG00000011027
1_46000506_46000867	362	0.212	0.001434	0.212	0.001571	0.0065028	0.00813572	down	down		Promoter	ENSDART00000092613	glutamate receptor, ionotropic, N-methyl D-aspartate 2B, genome duplicate b [Source:ZFIN;Acc:ZDB-GENE-061207-27]	ENSDARG00000030376
1_52973528_52974135	608	0.212	0.001434	0.212	0.001571	0.0065028	0.00813572	down	down		Promoter	ENSDART00000074231	claudin domain containing 1 [Source:HGNC Symbol;Acc:1322]	ENSDARG00000052386
1_56445827_56446495	669	0.212	0.001434	0.212	0.001571	0.0065028	0.00813572	down	down		Promoter	ENSDART00000110562	si:ch73-343l4.8 [Source:ZFIN;Acc:ZDB-GENE-090313-159]	ENSDARG00000077975
1_60263012_60263535	524	0.212	0.001434	0.212	0.001571	0.0065028	0.00813572	down	down		Promoter	ENSDART00000014072	collagen, type V, alpha 3b [Source:ZFIN;Acc:ZDB-GENE-110728-4]	ENSDARG00000028524
1_767380_768084	705	0.212	0.001434	0.212	0.001571	0.0065028	0.00813572	down	down		Promoter	ENSDART00000129342	SET domain, bifurcated 2 [Source:HGNC Symbol;Acc:20263]	ENSDARG00000090668
10_10832594_10833429	836	0.212	0.001434	0.212	0.001571	0.0065028	0.00813572	down	down		Promoter	ENSDART00000122657	notch-regulated ankyrin repeat protein a [Source:ZFIN;Acc:ZDB-GENE-030515-6]	ENSDARG00000091419
10_1093384_1094037	654	0.212	0.001434	0.212	0.001571	0.0065028	0.00813572	down	down		Promoter	ENSDART00000123405	unc-5 homolog C (C. elegans) [Source:ZFIN;Acc:ZDB-GENE-030131-9196]	ENSDARG00000087341
10_11361898_11362514	617	0.212	0.001434	0.212	0.001571	0.0065028	0.00813572	down	down		Promoter	ENSDART00000064210	CWC27 spliceosome-associated protein homolog (S. cerevisiae) [Source:ZFIN;Acc:ZDB-GENE-040426-1118]	ENSDARG00000043727
10_15435940_15436344	405	0.212	0.001434	0.212	0.001571	0.0065028	0.00813572	down	down		Promoter	ENSDART00000020665	small glutamine-rich tetratricopeptide repeat (TPR)-containing, alpha [Source:ZFIN;Acc:ZDB-GENE-040704-72]	ENSDARG00000016769
10_40395398_40395699	302	0.212	0.001434	0.212	0.001571	0.0065028	0.00813572	down	down		Promoter	ENSDART00000144036	immunoglobulin superfamily, member 5 [Source:ZFIN;Acc:ZDB-GENE-091204-182]	ENSDARG00000087983
10_5951053_5951706	654	0.212	0.001434	0.212	0.001571	0.0065028	0.00813572	down	down		Promoter	ENSDART00000146534
10_6070144_6070626	483	0.212	0.001434	0.212	0.001571	0.0065028	0.00813572	down	down		Promoter	ENSDART00000124209	neuregulin 1 [Source:ZFIN;Acc:ZDB-GENE-050302-113]	ENSDARG00000068458
10_7381114_7381803	690	0.212	0.001434	0.212	0.001571	0.0065028	0.00813572	down	down		Promoter	ENSDART00000059322	chondroitin sulfate N-acetylgalactosaminyltransferase 1 [Source:HGNC Symbol;Acc:24290]	ENSDARG00000040535
11_4025433_4025861	429	0.212	0.001434	0.212	0.001571	0.0065028	0.00813572	down	down		Promoter	ENSDART00000122833
11_46289252_46289580	329	0.212	0.001434	0.212	0.001571	0.0065028	0.00813572	down	down		Promoter	ENSDART00000055253	filamin A interacting protein 1-like [Source:HGNC Symbol;Acc:24589]	ENSDARG00000037910
12_17525560_17525867	308	0.212	0.001434	0.212	0.001571	0.0065028	0.00813572	down	down		Promoter	ENSDART00000037601	ribonuclease P/MRP 30 subunit [Source:ZFIN;Acc:ZDB-GENE-050320-45]	ENSDARG00000027428
12_3450313_3450871	559	0.212	0.001434	0.212	0.001571	0.0065028	0.00813572	down	down		Promoter	ENSDART00000152772	zinc finger, DHHC domain containing 16b [Source:ZFIN;Acc:ZDB-GENE-040426-1301]	ENSDARG00000015989
12_44826839_44827190	352	0.212	0.001434	0.212	0.001571	0.0065028	0.00813572	down	down		Promoter	ENSDART00000115373	family with sequence similarity 196, member A [Source:HGNC Symbol;Acc:33859]	ENSDARG00000079559
13_31871307_31871942	636	0.212	0.001434	0.212	0.001571	0.0065028	0.00813572	down	down		Promoter	ENSDART00000125987	sine oculis homeobox homolog 4a [Source:ZFIN;Acc:ZDB-GENE-010201-2]	ENSDARG00000004695
13_33129400_33130089	690	0.212	0.001434	0.212	0.001571	0.0065028	0.00813572	down	down		Promoter	ENSDART00000113823	chromosome 2 open reading frame 50 [Source:HGNC Symbol;Acc:26324]	ENSDARG00000078140
13_46405299_46405975	677	0.212	0.001434	0.212	0.001571	0.0065028	0.00813572	down	down		Promoter	ENSDART00000056990
13_47519977_47520317	341	0.212	0.001434	0.212	0.001571	0.0065028	0.00813572	down	down		Promoter	ENSDART00000117560
13_51888988_51889712	725	0.212	0.001434	0.212	0.001571	0.0065028	0.00813572	down	down		Promoter	ENSDART00000122255
13_8911238_8912213	976	0.212	0.001434	0.212	0.001571	0.0065028	0.00813572	down	down		Promoter	ENSDART00000006257	zgc:101572 [Source:ZFIN;Acc:ZDB-GENE-041114-119]	ENSDARG00000003208
14_4329634_4330129	496	0.212	0.001434	0.212	0.001571	0.0065028	0.00813572	down	down		Promoter	ENSDART00000112669	Uncharacterized protein [Source:UniProtKB/TrEMBL;Acc:E7F2Z3]	ENSDARG00000074971
14_5838662_5839558	897	0.212	0.001434	0.212	0.001571	0.0065028	0.00813572	down	down		Promoter	ENSDART00000054867	ancient ubiquitous protein 1 [Source:ZFIN;Acc:ZDB-GENE-030131-3375]	ENSDARG00000092609
15_13553364_13554127	764	0.212	0.001434	0.212	0.001571	0.0065028	0.00813572	down	down		Promoter	ENSDART00000080939	si:dkey-260j18.2 [Source:ZFIN;Acc:ZDB-GENE-030131-3956]	ENSDARG00000058122
15_43673120_43674139	1020	0.212	0.001434	0.212	0.001571	0.0065028	0.00813572	down	down		Promoter	ENSDART00000098594	colony stimulating factor 1 receptor, a [Source:ZFIN;Acc:ZDB-GENE-001205-1]	ENSDARG00000007889
15_5218417_5218858	442	0.212	0.001434	0.212	0.001571	0.0065028	0.00813572	down	down		Promoter	ENSDART00000110420	odorant receptor, family A, subfamily 112, member 1 [Source:ZFIN;Acc:ZDB-GENE-990415-195]	ENSDARG00000077211
16_11182415_11183084	670	0.212	0.001434	0.212	0.001571	0.0065028	0.00813572	down	down		Promoter	ENSDART00000112343	TAF2 RNA polymerase II, TATA box binding protein (TBP)-associated factor, 150kDa [Source:HGNC Symbol;Acc:11536]	ENSDARG00000078045
16_18924694_18925114	421	0.212	0.001434	0.212	0.001571	0.0065028	0.00813572	down	down		Promoter	ENSDART00000047409	myosin, heavy chain 14, non-muscle [Source:ZFIN;Acc:ZDB-GENE-100921-1]	ENSDARG00000073732
16_19380808_19381231	424	0.212	0.001434	0.212	0.001571	0.0065028	0.00813572	down	down		Promoter	ENSDART00000147615	zyxin [Source:ZFIN;Acc:ZDB-GENE-070928-18]	ENSDARG00000075733
16_23971812_23973172	1361	0.212	0.001434	0.212	0.001571	0.0065028	0.00813572	down	down		Promoter	ENSDART00000078858	C-type lectin domain family 6, member A [Source:HGNC Symbol;Acc:14556]	ENSDARG00000056379
16_28659566_28660461	896	0.212	0.001434	0.212	0.001571	0.0065028	0.00813572	down	down		Promoter	ENSDART00000118987
16_34480327_34480879	553	0.212	0.001434	0.212	0.001571	0.0065028	0.00813572	down	down		Promoter	ENSDART00000131814
16_36825542_36826628	1087	0.212	0.001434	0.212	0.001571	0.0065028	0.00813572	down	down		Promoter	ENSDART00000121771
16_45772632_45773099	468	0.212	0.001434	0.212	0.001571	0.0065028	0.00813572	down	down		Promoter	ENSDART00000057305	thrombospondin 3a [Source:ZFIN;Acc:ZDB-GENE-020708-3]	ENSDARG00000077641
17_22949543_22950017	475	0.212	0.001434	0.212	0.001571	0.0065028	0.00813572	down	down		Promoter	ENSDART00000138069	RAS guanyl releasing protein 3 (calcium and DAG-regulated) [Source:ZFIN;Acc:ZDB-GENE-070424-82]	ENSDARG00000077864
17_50070526_50071751	1226	0.212	0.001434	0.212	0.001571	0.0065028	0.00813572	down	down		Promoter	ENSDART00000128764	solute carrier family 7 (anionic amino acid transporter), member 13 [Source:HGNC Symbol;Acc:23092]	ENSDARG00000089192
17_50584894_50585557	664	0.212	0.001434	0.212	0.001571	0.0065028	0.00813572	down	down		Promoter	ENSDART00000058716	Uncharacterized protein [Source:UniProtKB/TrEMBL;Acc:E7F1E6]	ENSDARG00000090987
18_29911960_29912515	556	0.212	0.001434	0.212	0.001571	0.0065028	0.00813572	down	down		Promoter	ENSDART00000140661	si:ch73-103b9.2 [Source:ZFIN;Acc:ZDB-GENE-070705-199]	ENSDARG00000092489
18_4002363_4002808	446	0.212	0.001434	0.212	0.001571	0.0065028	0.00813572	down	down		Promoter	ENSDART00000131497
18_7278023_7278471	449	0.212	0.001434	0.212	0.001571	0.0065028	0.00813572	down	down		Promoter	ENSDART00000119931
19_48864905_48866104	1200	0.212	0.001434	0.212	0.001571	0.0065028	0.00813572	down	down		Promoter	ENSDART00000043713	angiopoietin 1 [Source:ZFIN;Acc:ZDB-GENE-010817-1]	ENSDARG00000030364
2_13251662_13252209	548	0.212	0.001434	0.212	0.001571	0.0065028	0.00813572	down	down		Promoter	ENSDART00000149309	WD repeat domain 65 [Source:ZFIN;Acc:ZDB-GENE-110411-266]	ENSDARG00000058090
2_17316662_17317311	650	0.212	0.001434	0.212	0.001571	0.0065028	0.00813572	down	down		Promoter	ENSDART00000024302	lysine (K)-specific demethylase 4A, genome duplicate b [Source:ZFIN;Acc:ZDB-GENE-030131-6279]	ENSDARG00000019103
2_22438921_22439769	849	0.212	0.001434	0.212	0.001571	0.0065028	0.00813572	down	down		Promoter	ENSDART00000143925
2_28253301_28253818	518	0.212	0.001434	0.212	0.001571	0.0065028	0.00813572	down	down		Promoter	ENSDART00000131506	cadherin 6 [Source:ZFIN;Acc:ZDB-GENE-050320-92]	ENSDARG00000014522
2_43377426_43377894	469	0.212	0.001434	0.212	0.001571	0.0065028	0.00813572	down	down		Promoter	ENSDART00000131718
2_54269479_54270508	1030	0.212	0.001434	0.212	0.001571	0.0065028	0.00813572	down	down		Promoter	ENSDART00000117684
2_60232035_60233071	1037	0.212	0.001434	0.212	0.001571	0.0065028	0.00813572	down	down		Promoter	ENSDART00000121996	Uncharacterized protein [Source:UniProtKB/TrEMBL;Acc:E7F8W0]	ENSDARG00000086995
2_9609407_9610087	681	0.212	0.001434	0.212	0.001571	0.0065028	0.00813572	down	down		Promoter	ENSDART00000046587	adaptor-related protein complex 2, mu 1 subunit, a [Source:ZFIN;Acc:ZDB-GENE-030131-9784]	ENSDARG00000002790
20_26728621_26729361	741	0.212	0.001434	0.212	0.001571	0.0065028	0.00813572	down	down		Promoter	ENSDART00000077753	forkhead box C1b [Source:ZFIN;Acc:ZDB-GENE-010302-2]	ENSDARG00000055398
21_175583_176256	674	0.212	0.001434	0.212	0.001571	0.0065028	0.00813572	down	down		Promoter	ENSDART00000112566	homer homolog 1 (Drosophila) [Source:HGNC Symbol;Acc:17512]	ENSDARG00000073803
21_31142511_31143284	774	0.212	0.001434	0.212	0.001571	0.0065028	0.00813572	down	down		Promoter	ENSDART00000112550	mitogen-activated protein kinase 9 [Source:ZFIN;Acc:ZDB-GENE-091117-28]	ENSDARG00000077364
21_42001614_42002757	1144	0.212	0.001434	0.212	0.001571	0.0065028	0.00813572	down	down		Promoter	ENSDART00000047936	si:ch73-362m14.4 [Source:ZFIN;Acc:ZDB-GENE-120215-30]	ENSDARG00000023940
21_4278520_4279406	887	0.212	0.001434	0.212	0.001571	0.0065028	0.00813572	down	down		Promoter	ENSDART00000053609	dolichyl pyrophosphate phosphatase 1 [Source:ZFIN;Acc:ZDB-GENE-041024-11]	ENSDARG00000036915
21_4384364_4385084	721	0.212	0.001434	0.212	0.001571	0.0065028	0.00813572	down	down		Promoter	ENSDART00000123759	Rap guanine nucleotide exchange factor (GEF) 1b [Source:ZFIN;Acc:ZDB-GENE-040426-1001]	ENSDARG00000015971
22_10683292_10684066	775	0.212	0.001434	0.212	0.001571	0.0065028	0.00813572	down	down		Promoter	ENSDART00000140736	shisa homolog 4 (Xenopus laevis) [Source:HGNC Symbol;Acc:27139]	ENSDARG00000013681
22_1789430_1789915	486	0.212	0.001434	0.212	0.001571	0.0065028	0.00813572	down	down		Promoter	ENSDART00000146337	zgc:175284 [Source:ZFIN;Acc:ZDB-GENE-080219-49]	ENSDARG00000078159
22_1814509_1815013	505	0.212	0.001434	0.212	0.001571	0.0065028	0.00813572	down	down		Promoter	ENSDART00000143505	si:ch73-92e7.6 [Source:ZFIN;Acc:ZDB-GENE-081031-35]	ENSDARG00000094309
22_20877660_20878132	473	0.212	0.001434	0.212	0.001571	0.0065028	0.00813572	down	down		Promoter	ENSDART00000135490	nuclear factor, interleukin 3 regulated, member 4 [Source:ZFIN;Acc:ZDB-GENE-070424-214]	ENSDARG00000092346
22_998323_999881	1559	0.212	0.001434	0.212	0.001571	0.0065028	0.00813572	down	down		Promoter	ENSDART00000148607
23_10788712_10789642	931	0.212	0.001434	0.212	0.001571	0.0065028	0.00813572	down	down		Promoter	ENSDART00000136509
23_13491359_13492091	733	0.212	0.001434	0.212	0.001571	0.0065028	0.00813572	down	down		Promoter	ENSDART00000104819	zinc finger protein 512B [Source:HGNC Symbol;Acc:29212]	ENSDARG00000071055
23_14944478_14945046	569	0.212	0.001434	0.212	0.001571	0.0065028	0.00813572	down	down		Promoter	ENSDART00000134659	Src-like-adaptor 2 [Source:ZFIN;Acc:ZDB-GENE-080204-98]	ENSDARG00000020788
23_21128232_21128685	454	0.212	0.001434	0.212	0.001571	0.0065028	0.00813572	down	down		Promoter	ENSDART00000127628	ERBB receptor feedback inhibitor 1 [Source:HGNC Symbol;Acc:18185]	ENSDARG00000086098
23_27439243_27440491	1249	0.212	0.001434	0.212	0.001571	0.0065028	0.00813572	down	down		Promoter	ENSDART00000136075
23_3718210_3718852	643	0.212	0.001434	0.212	0.001571	0.0065028	0.00813572	down	down		Promoter	ENSDART00000143731	protein kinase C and casein kinase substrate in neurons 1a [Source:ZFIN;Acc:ZDB-GENE-050522-155]	ENSDARG00000032865
23_40496344_40496739	396	0.212	0.001434	0.212	0.001571	0.0065028	0.00813572	down	down		Promoter	ENSDART00000149390	transglutaminase 1 like 2 [Source:ZFIN;Acc:ZDB-GENE-110408-37]	ENSDARG00000019024
23_41025071_41026146	1076	0.212	0.001434	0.212	0.001571	0.0065028	0.00813572	down	down		Promoter	ENSDART00000121183
23_4337549_4337984	436	0.212	0.001434	0.212	0.001571	0.0065028	0.00813572	down	down		Promoter	ENSDART00000138408		ENSDARG00000094801
23_44757208_44758081	874	0.212	0.001434	0.212	0.001571	0.0065028	0.00813572	down	down		Promoter	ENSDART00000140799	zgc:85858 [Source:ZFIN;Acc:ZDB-GENE-040426-2333]	ENSDARG00000039008
23_6840865_6841426	562	0.212	0.001434	0.212	0.001571	0.0065028	0.00813572	down	down		Promoter	ENSDART00000081596	bromodomain adjacent to zinc finger domain, 2A [Source:ZFIN;Acc:ZDB-GENE-041010-202]	ENSDARG00000090952
23_9960613_9961165	553	0.212	0.001434	0.212	0.001571	0.0065028	0.00813572	down	down		Promoter	ENSDART00000121046
24_20625101_20625755	655	0.212	0.001434	0.212	0.001571	0.0065028	0.00813572	down	down		Promoter	ENSDART00000082201	solute carrier family 22 (organic anion transporter), member 13 [Source:HGNC Symbol;Acc:8494]	ENSDARG00000059166
24_27176481_27177130	650	0.212	0.001434	0.212	0.001571	0.0065028	0.00813572	down	down		Promoter	ENSDART00000139136
25_21338735_21339164	430	0.212	0.001434	0.212	0.001571	0.0065028	0.00813572	down	down		Promoter	ENSDART00000130909	enhancer of mRNA decapping 3 homolog (S. cerevisiae) [Source:ZFIN;Acc:ZDB-GENE-050522-287]	ENSDARG00000051931
25_32718838_32719388	551	0.212	0.001434	0.212	0.001571	0.0065028	0.00813572	down	down		Promoter	ENSDART00000098896	zgc:101553 [Source:ZFIN;Acc:ZDB-GENE-041114-124]	ENSDARG00000040427
25_36408750_36409774	1025	0.212	0.001434	0.212	0.001571	0.0065028	0.00813572	down	down		Promoter	ENSDART00000108575	proteasome (prosome, macropain) subunit, alpha type, 1 [Source:ZFIN;Acc:ZDB-GENE-040801-15]	ENSDARG00000074076
25_38210954_38211321	368	0.212	0.001434	0.212	0.001571	0.0065028	0.00813572	down	down		Promoter	ENSDART00000152338	tudor domain containing 12 [Source:HGNC Symbol;Acc:25044]	ENSDARG00000075217
3_15821304_15821929	626	0.212	0.001434	0.212	0.001571	0.0065028	0.00813572	down	down		Promoter	ENSDART00000121039
3_22570793_22571366	574	0.212	0.001434	0.212	0.001571	0.0065028	0.00813572	down	down		Promoter	ENSDART00000058507	interferon phi 2 [Source:ZFIN;Acc:ZDB-GENE-071128-1]	ENSDARG00000069012
3_60630555_60631223	669	0.212	0.001434	0.212	0.001571	0.0065028	0.00813572	down	down		Promoter	ENSDART00000140231	Uncharacterized protein [Source:UniProtKB/TrEMBL;Acc:F1QLZ6]	ENSDARG00000095664
4_3324510_3324844	335	0.212	0.001434	0.212	0.001571	0.0065028	0.00813572	down	down		Promoter	ENSDART00000058277	zinc finger protein 800b [Source:ZFIN;Acc:ZDB-GENE-040426-1166]	ENSDARG00000039843
4_46115518_46116110	593	0.212	0.001434	0.212	0.001571	0.0065028	0.00813572	down	down		Promoter	ENSDART00000136222
4_48167005_48167629	625	0.212	0.001434	0.212	0.001571	0.0065028	0.00813572	down	down		Promoter	ENSDART00000117993
4_5211450_5212152	703	0.212	0.001434	0.212	0.001571	0.0065028	0.00813572	down	down	Y	Promoter	ENSDART00000067371	zgc:113263 [Source:ZFIN;Acc:ZDB-GENE-050306-34]	ENSDARG00000045842
4_53234973_53236010	1038	0.212	0.001434	0.212	0.001571	0.0065028	0.00813572	down	down		Promoter	ENSDART00000143788	si:ch211-152l15.2 [Source:ZFIN;Acc:ZDB-GENE-110913-91]	ENSDARG00000093478
5_194493_195497	1005	0.212	0.001434	0.212	0.001571	0.0065028	0.00813572	down	down		Promoter	ENSDART00000038929	zgc:153924 [Source:ZFIN;Acc:ZDB-GENE-060929-812]	ENSDARG00000028415
5_38253992_38254359	368	0.212	0.001434	0.212	0.001571	0.0065028	0.00813572	down	down		Promoter	ENSDART00000131339	calpain, small subunit 1 a [Source:ZFIN;Acc:ZDB-GENE-030113-3]	ENSDARG00000035329
5_39496021_39496359	339	0.212	0.001434	0.212	0.001571	0.0065028	0.00813572	down	down		Promoter	ENSDART00000136298
5_47765869_47766739	871	0.212	0.001434	0.212	0.001571	0.0065028	0.00813572	down	down		Promoter	ENSDART00000123144	coagulation factor II (thrombin) receptor-like 2 [Source:ZFIN;Acc:ZDB-GENE-110127-4]	ENSDARG00000090524
5_56763966_56764650	685	0.212	0.001434	0.212	0.001571	0.0065028	0.00813572	down	down		Promoter	ENSDART00000097499	zgc:158260 [Source:ZFIN;Acc:ZDB-GENE-061201-24]	ENSDARG00000089020
5_70199357_70200155	799	0.212	0.001434	0.212	0.001571	0.0065028	0.00813572	down	down		Promoter	ENSDART00000145122	CAP-GLY domain containing linker protein 1a [Source:ZFIN;Acc:ZDB-GENE-060526-282]	ENSDARG00000078722
6_14983113_14984508	1396	0.212	0.001434	0.212	0.001571	0.0065028	0.00813572	down	down		Promoter	ENSDART00000138078
6_20262836_20263460	625	0.212	0.001434	0.212	0.001571	0.0065028	0.00813572	down	down		Promoter	ENSDART00000129855	down-regulator of transcription 1 [Source:ZFIN;Acc:ZDB-GENE-061013-797]	ENSDARG00000059752
6_24812083_24813676	1594	0.212	0.001434	0.212	0.001571	0.0065028	0.00813572	down	down		Promoter	ENSDART00000146177	Uncharacterized protein [Source:UniProtKB/TrEMBL;Acc:F1QTA8]	ENSDARG00000093328
6_51507639_51509241	1603	0.212	0.001434	0.212	0.001571	0.0065028	0.00813572	down	down		Promoter	ENSDART00000149033	retinoblastoma-like 1 (p107) [Source:ZFIN;Acc:ZDB-GENE-030131-8179]	ENSDARG00000008141
6_6980862_6981889	1028	0.212	0.001434	0.212	0.001571	0.0065028	0.00813572	down	down		Promoter	ENSDART00000122719	Indian hedgehog homolog b [Source:ZFIN;Acc:ZDB-GENE-980526-135]	ENSDARG00000058815
7_16446457_16446822	366	0.212	0.001434	0.212	0.001571	0.0065028	0.00813572	down	down		Promoter	ENSDART00000080190	myocyte enhancer factor 2A [Source:HGNC Symbol;Acc:6993]	ENSDARG00000057527
7_1652310_1653008	699	0.212	0.001434	0.212	0.001571	0.0065028	0.00813572	down	down		Promoter	ENSDART00000050687	lysophosphatidylcholine acyltransferase 4 [Source:ZFIN;Acc:ZDB-GENE-030131-5777]	ENSDARG00000035028
7_26983964_26984505	542	0.212	0.001434	0.212	0.001571	0.0065028	0.00813572	down	down		Promoter	ENSDART00000148780	myotubularin related protein 1a [Source:ZFIN;Acc:ZDB-GENE-050522-518]	ENSDARG00000056690
7_5067067_5067844	778	0.212	0.001434	0.212	0.001571	0.0065028	0.00813572	down	down		Promoter	ENSDART00000147669	si:dkey-28d5.10 [Source:ZFIN;Acc:ZDB-GENE-060503-353]	ENSDARG00000093876
7_58349198_58350815	1618	0.212	0.001434	0.212	0.001571	0.0065028	0.00813572	down	down	Y	Promoter	ENSDART00000024076	secretory carrier membrane protein 2, like [Source:ZFIN;Acc:ZDB-GENE-030131-6432]	ENSDARG00000017010
7_730351_731590	1240	0.212	0.001434	0.212	0.001571	0.0065028	0.00813572	down	down		Promoter	ENSDART00000152210
8_2139810_2140301	492	0.212	0.001434	0.212	0.001571	0.0065028	0.00813572	down	down		Promoter	ENSDART00000109734	si:dkey-178e17.1 [Source:ZFIN;Acc:ZDB-GENE-081104-41]	ENSDARG00000080000
8_32456374_32456760	387	0.212	0.001434	0.212	0.001571	0.0065028	0.00813572	down	down		Promoter	ENSDART00000018886	growth hormone receptor a [Source:ZFIN;Acc:ZDB-GENE-070509-1]	ENSDARG00000054771
8_35582282_35583355	1074	0.212	0.001434	0.212	0.001571	0.0065028	0.00813572	down	down	Y	Promoter	ENSDART00000138417	zgc:77614 [Source:ZFIN;Acc:ZDB-GENE-040426-1844]	ENSDARG00000093439
8_41819565_41820315	751	0.212	0.001434	0.212	0.001571	0.0065028	0.00813572	down	down		Promoter	ENSDART00000119388
8_49929065_49929488	424	0.212	0.001434	0.212	0.001571	0.0065028	0.00813572	down	down		Promoter	ENSDART00000146775	KN motif and ankyrin repeat domains 3 [Source:ZFIN;Acc:ZDB-GENE-081105-185]	ENSDARG00000076566
9_1310707_1311422	716	0.212	0.001434	0.212	0.001571	0.0065028	0.00813572	down	down		Promoter	ENSDART00000130858
9_28401652_28402123	472	0.212	0.001434	0.212	0.001571	0.0065028	0.00813572	down	down		Promoter	ENSDART00000060337	si:dkey-193n17.7 [Source:ZFIN;Acc:ZDB-GENE-070912-420]	ENSDARG00000041164
9_306815_307185	371	0.212	0.001434	0.212	0.001571	0.0065028	0.00813572	down	down		Promoter	ENSDART00000086304	solute carrier family 5 (choline transporter), member 7 [Source:HGNC Symbol;Acc:14025]	ENSDARG00000060912
12_31916800_31918204	1405	0.319	0	0.475	2.2e-05	0	0.000489244	down	down		Promoter	ENSDART00000128459	von Willebrand factor A domain containing 2 [Source:ZFIN;Acc:ZDB-GENE-100302-1]	ENSDARG00000075441
23_43247779_43249144	1366	0.34	0.000187	0.402	0.001262	0.00160776	0.00742254	down	down		Promoter	ENSDART00000148781	discs, large (Drosophila) homolog-associated protein 4a [Source:ZFIN;Acc:ZDB-GENE-080219-51]	ENSDARG00000060849
20_14569098_14570344	1247	0.35	0.002183	0.102	0	0.00890419	0	down	down		Promoter	ENSDART00000152703
20_14581004_14581805	802	0.359	1.3e-05	0.499	0.001542	0.000273851	0.00813572	down	down		Promoter	ENSDART00000152816	secernin 2 [Source:ZFIN;Acc:ZDB-GENE-040724-75]	ENSDARG00000043497
6_58803583_58804447	865	0.374	0.000673	0.074	0	0.00415334	0	down	down		Promoter	ENSDART00000122003	methyl-CpG binding domain protein 6 [Source:ZFIN;Acc:ZDB-GENE-041027-3]	ENSDARG00000086980
15_44741715_44743177	1463	0.383	0	0.009	0	0	0	down	down		Promoter	ENSDART00000113494	Mab-21 domain containing 2 [Source:HGNC Symbol;Acc:30438]	ENSDARG00000077316
11_24269582_24272940	3359	0.403	0.000365	0.458	0.001791	0.00257138	0.00881749	down	down		Promoter	ENSDART00000125024	golgi transport 1A [Source:HGNC Symbol;Acc:24766]	ENSDARG00000088933
10_6657427_6659933	2507	0.407	0	0.487	1e-05	0	0.000288675	down	down		Promoter	ENSDART00000117939
1_10293258_10293950	693	6.274	3.6e-05	5.987	6.7e-05	0.000516781	0.00090835	up	up		Promoter	ENSDART00000102929	cancer susceptibility candidate 5 [Source:ZFIN;Acc:ZDB-GENE-030131-5437]	ENSDARG00000070239
1_13350692_13351739	1048	4.651	0.000835	5.156	0.000333	0.00420871	0.00285629	up	up		Promoter	ENSDART00000114097	stromal interaction molecule 2 [Source:HGNC Symbol;Acc:19205]	ENSDARG00000074867
1_148222_149893	1672	10.736	0	5.987	6.7e-05	0	0.00090835	up	up		Promoter	ENSDART00000133431	centromere protein E [Source:ZFIN;Acc:ZDB-GENE-060929-860]	ENSDARG00000063385
1_18586994_18587739	746	4.245	0.001836	4.74	0.000741	0.00753688	0.0047841	up	up		Promoter	ENSDART00000139314	glyoxylate reductase/hydroxypyruvate reductase b [Source:ZFIN;Acc:ZDB-GENE-040426-1847]	ENSDARG00000019986
1_1865417_1866602	1186	8.708	0	10.559	0	0	0	up	up		Promoter	ENSDART00000131714	muscleblind-like 2 (Drosophila) [Source:ZFIN;Acc:ZDB-GENE-030131-9582]	ENSDARG00000018460
1_19374751_19375432	682	4.245	0.001836	4.325	0.001651	0.00753688	0.00813572	up	up		Promoter	ENSDART00000132440	si:ch211-142c4.1 [Source:ZFIN;Acc:ZDB-GENE-100922-47]	ENSDARG00000093816
1_20564622_20566103	1482	7.085	7e-06	6.818	1.4e-05	0.000161553	0.000337922	up	up		Promoter	ENSDART00000054395	paired box gene 5 [Source:ZFIN;Acc:ZDB-GENE-001030-2]	ENSDARG00000037383
1_2689451_2691524	2074	4.651	0.000835	5.987	6.7e-05	0.00420871	0.00090835	up	up		Promoter	ENSDART00000117888
1_27692365_27693104	740	5.462	0.000173	7.234	6e-06	0.00149083	0.000186844	up	up		Promoter	ENSDART00000148674
1_33315768_33316521	754	7.491	3e-06	5.987	6.7e-05	8.33073e-05	0.00090835	up	up		Promoter	ENSDART00000149105
1_3368486_3369495	1010	6.274	3.6e-05	6.403	3e-05	0.000516781	0.000560422	up	up		Promoter	ENSDART00000116405
1_34349371_34350242	872	5.868	7.9e-05	4.325	0.001651	0.000847656	0.00813572	up	up		Promoter	ENSDART00000102111	tumor protein, translationally-controlled 1 [Source:ZFIN;Acc:ZDB-GENE-990603-10]	ENSDARG00000092693
1_348821_349437	617	4.651	0.000835	5.156	0.000333	0.00420871	0.00285629	up	up	Y	Promoter	ENSDART00000152684	zgc:92518 [Source:ZFIN;Acc:ZDB-GENE-040718-53]	ENSDARG00000016343
1_396784_397730	947	5.057	0.00038	4.74	0.000741	0.00257138	0.0047841	up	up	Y	Promoter	ENSDART00000020327	mitochondrial ribosomal protein L16 [Source:ZFIN;Acc:ZDB-GENE-041122-1]	ENSDARG00000075325
1_4285313_4285841	529	4.245	0.001836	4.325	0.001651	0.00753688	0.00813572	up	up		Promoter	ENSDART00000103724	Nedd4 family interacting protein 2 [Source:ZFIN;Acc:ZDB-GENE-040426-2662]	ENSDARG00000033928
1_47332325_47333110	786	6.679	1.6e-05	6.403	3e-05	0.000301041	0.000560422	up	up		Promoter	ENSDART00000142406	si:ch73-160h15.3 [Source:ZFIN;Acc:ZDB-GENE-100922-213]	ENSDARG00000094160
1_491139_492048	910	9.113	0	8.481	1e-06	0	5.13631e-05	up	up		Promoter	ENSDART00000134456	ATP synthase, H+ transporting, mitochondrial F0 complex, subunit F6 [Source:ZFIN;Acc:ZDB-GENE-040426-2534]	ENSDARG00000014313
1_50179226_50180322	1097	5.057	0.00038	5.572	0.000149	0.00257138	0.00159778	up	up		Promoter	ENSDART00000143797
1_51247477_51248349	873	5.057	0.00038	5.987	6.7e-05	0.00257138	0.00090835	up	up		Promoter	ENSDART00000110106	family with sequence similarity 13, member A [Source:ZFIN;Acc:ZDB-GENE-050208-102]	ENSDARG00000075564
1_52102630_52104291	1662	6.679	1.6e-05	6.403	3e-05	0.000301041	0.000560422	up	up		Promoter	ENSDART00000100869	protein phosphatase 3 (formerly 2B), regulatory s1ubunit B, alpha isoform, b [Source:ZFIN;Acc:ZDB-GENE-040912-18]	ENSDARG00000069360
1_55663703_55665229	1527	4.245	0.001836	5.156	0.000333	0.00753688	0.00285629	up	up		Promoter	ENSDART00000119783
1_57253644_57253998	355	4.245	0.001836	5.156	0.000333	0.00753688	0.00285629	up	up		Promoter	ENSDART00000143063	Uncharacterized protein [Source:UniProtKB/TrEMBL;Acc:F1QDP6]	ENSDARG00000095531
1_59177100_59178456	1357	4.245	0.001836	5.987	6.7e-05	0.00753688	0.00090835	up	up		Promoter	ENSDART00000152178	zgc:174890 [Source:ZFIN;Acc:ZDB-GENE-030131-6213]	ENSDARG00000052086
1_59882642_59883151	510	4.245	0.001836	9.312	0	0.00753688	0	up	up		Promoter	ENSDART00000152764	microfibrillar-associated protein 4 [Source:HGNC Symbol;Acc:7035]	ENSDARG00000092806
1_60316147_60317329	1183	4.651	0.000835	4.74	0.000741	0.00420871	0.0047841	up	up		Promoter	ENSDART00000152600	multivesicular body subunit 12A [Source:HGNC Symbol;Acc:25153]	ENSDARG00000096590
1_6512940_6513361	422	7.896	2e-06	5.987	6.7e-05	6.10614e-05	0.00090835	up	up		Promoter	ENSDART00000015732	myosin, light polypeptide 3, skeletal muscle [Source:ZFIN;Acc:ZDB-GENE-000322-6]	ENSDARG00000017441
1_777153_778718	1566	4.651	0.000835	6.403	3e-05	0.00420871	0.000560422	up	up		Promoter	ENSDART00000015372	polyhomeotic-like 2b [Source:ZFIN;Acc:ZDB-GENE-040426-1113]	ENSDARG00000001915
1_8155355_8156598	1244	6.679	1.6e-05	6.403	3e-05	0.000301041	0.000560422	up	up		Promoter	ENSDART00000146303	calcium channel, voltage-dependent, gamma subunit 3a [Source:ZFIN;Acc:ZDB-GENE-090312-124]	ENSDARG00000058460
1_9043861_9044910	1050	5.868	7.9e-05	4.74	0.000741	0.000847656	0.0047841	up	up		Promoter	ENSDART00000111299	lipopolysaccharide-induced TNF factor [Source:HGNC Symbol;Acc:16841]	ENSDARG00000077542
1_9481216_9482290	1075	5.868	7.9e-05	5.987	6.7e-05	0.000847656	0.00090835	up	up		Promoter	ENSDART00000043881	zgc:77880 [Source:ZFIN;Acc:ZDB-GENE-040426-1901]	ENSDARG00000030563
1_9552672_9553484	813	4.245	0.001836	5.987	6.7e-05	0.00753688	0.00090835	up	up		Promoter	ENSDART00000046283	dachshund b [Source:ZFIN;Acc:ZDB-GENE-020402-4]	ENSDARG00000034785
10_13268867_13269411	545	5.462	0.000173	4.325	0.001651	0.00149083	0.00813572	up	up		Promoter	ENSDART00000120961
10_15339484_15340787	1304	4.651	0.000835	8.896	0	0.00420871	0	up	up		Promoter	ENSDART00000111073	potassium channel, subfamily V, member 2a [Source:ZFIN;Acc:ZDB-GENE-091117-27]	ENSDARG00000076644
10_15539049_15539704	656	5.057	0.00038	4.325	0.001651	0.00257138	0.00813572	up	up		Promoter	ENSDART00000129441	erbb2 interacting protein [Source:ZFIN;Acc:ZDB-GENE-061103-403]	ENSDARG00000044281
10_15660628_15661263	636	4.245	0.001836	4.74	0.000741	0.00753688	0.0047841	up	up		Promoter	ENSDART00000147693
10_21442695_21443449	755	6.679	1.6e-05	4.325	0.001651	0.000301041	0.00813572	up	up		Promoter	ENSDART00000125167	avidin-like (LOC567678), mRNA [Source:RefSeq mRNA;Acc:NM_001201442]	ENSDARG00000087961
10_21780055_21781249	1195	4.245	0.001836	6.818	1.4e-05	0.00753688	0.000337922	up	up		Promoter	ENSDART00000113838	protocadherin 1 gamma b 9 [Source:ZFIN;Acc:ZDB-GENE-041118-18]	ENSDARG00000076107
10_29938625_29939385	761	6.274	3.6e-05	6.403	3e-05	0.000516781	0.000560422	up	up		Promoter	ENSDART00000148828	phosphatidylinositol binding clathrin assembly protein [Source:ZFIN;Acc:ZDB-GENE-040426-761]	ENSDARG00000012866
10_43455020_43455859	840	4.245	0.001836	4.74	0.000741	0.00753688	0.0047841	up	up		Promoter	ENSDART00000063071	DiGeorge syndrome critical region gene 2 [Source:ZFIN;Acc:ZDB-GENE-040718-404]	ENSDARG00000042962
10_44266097_44266955	859	6.274	3.6e-05	6.403	3e-05	0.000516781	0.000560422	up	up		Promoter	ENSDART00000099270	astacin-like metallo-endopeptidase (M12 family) [Source:HGNC Symbol;Acc:31704]	ENSDARG00000068593
10_5853020_5853409	390	4.245	0.001836	4.325	0.001651	0.00753688	0.00813572	up	up		Promoter	ENSDART00000042311	fucosyltransferase 10 [Source:ZFIN;Acc:ZDB-GENE-081022-183]	ENSDARG00000029601
10_6765946_6766679	734	4.245	0.001836	5.987	6.7e-05	0.00753688	0.00090835	up	up		Promoter	ENSDART00000075563	sorting nexin 24 [Source:ZFIN;Acc:ZDB-GENE-050913-45]	ENSDARG00000053527
11_11326638_11327623	986	5.057	0.00038	5.572	0.000149	0.00257138	0.00159778	up	up		Promoter	ENSDART00000087105	Uncharacterized protein [Source:UniProtKB/TrEMBL;Acc:E7EYE1]	ENSDARG00000075433
11_11392818_11393665	848	7.896	2e-06	5.572	0.000149	6.10614e-05	0.00159778	up	up		Promoter	ENSDART00000129843	protein tyrosine phosphatase type IVA, member 1 [Source:ZFIN;Acc:ZDB-GENE-041121-11]	ENSDARG00000006242
11_12233270_12234111	842	12.764	0	10.559	0	0	0	up	up		Promoter	ENSDART00000130998
11_12602058_12603365	1308	5.462	0.000173	12.221	0	0.00149083	0	up	up		Promoter	ENSDART00000129039
11_12616482_12617286	805	10.736	0	15.962	0	0	0	up	up		Promoter	ENSDART00000126691	Uncharacterized protein [Source:UniProtKB/TrEMBL;Acc:E7F9U1]	ENSDARG00000088166
11_12704690_12705571	882	7.896	2e-06	12.221	0	6.10614e-05	0	up	up		Promoter	ENSDART00000111121	zgc:174353 [Source:ZFIN;Acc:ZDB-GENE-071004-121]	ENSDARG00000087708
11_12799930_12800504	575	5.868	7.9e-05	6.403	3e-05	0.000847656	0.000560422	up	up		Promoter	ENSDART00000081335	retinoblastoma binding protein 4, like [Source:ZFIN;Acc:ZDB-GENE-030131-848]	ENSDARG00000015208
11_16549492_16550286	795	6.274	3.6e-05	7.234	6e-06	0.000516781	0.000186844	up	up		Promoter	ENSDART00000109585	chromosome 3 open reading frame 37 [Source:HGNC Symbol;Acc:24446]	ENSDARG00000077471
11_2231128_2231846	719	5.462	0.000173	5.572	0.000149	0.00149083	0.00159778	up	up		Promoter	ENSDART00000018131	zgc:66127 [Source:ZFIN;Acc:ZDB-GENE-040426-1546]	ENSDARG00000011020
11_2815200_2816067	868	4.245	0.001836	4.74	0.000741	0.00753688	0.0047841	up	up		Promoter	ENSDART00000148785	lipoma HMGIC fusion partner-like 5a [Source:ZFIN;Acc:ZDB-GENE-110131-8]	ENSDARG00000045023
11_31229497_31230494	998	4.245	0.001836	5.156	0.000333	0.00753688	0.00285629	up	up		Promoter	ENSDART00000030794	transmembrane protein 169 [Source:ZFIN;Acc:ZDB-GENE-090107-1]	ENSDARG00000027131
11_31602100_31602497	398	4.245	0.001836	5.572	0.000149	0.00753688	0.00159778	up	up		Promoter	ENSDART00000103270	solute carrier family 22 (organic anion transporter), member 7a [Source:ZFIN;Acc:ZDB-GENE-050506-52]	ENSDARG00000056028
11_38494645_38495338	694	9.113	0	7.65	3e-06	0	0.000119495	up	up		Promoter	ENSDART00000116566
11_40347419_40348145	727	4.651	0.000835	5.156	0.000333	0.00420871	0.00285629	up	up		Promoter	ENSDART00000111876	adaptor-related protein complex 5, beta 1 subunit [Source:HGNC Symbol;Acc:25104]	ENSDARG00000078805
11_42502640_42503385	746	7.491	3e-06	6.403	3e-05	8.33073e-05	0.000560422	up	up		Promoter	ENSDART00000124068	paired box 7 [Source:HGNC Symbol;Acc:8621]	ENSDARG00000091353
11_43621442_43623032	1591	4.651	0.000835	5.987	6.7e-05	0.00420871	0.00090835	up	up		Promoter	ENSDART00000130573	ATPase, H+ transporting, lysosomal accessory protein 1-like [Source:HGNC Symbol;Acc:28091]	ENSDARG00000091509
11_46195507_46196479	973	4.651	0.000835	5.156	0.000333	0.00420871	0.00285629	up	up		Promoter	ENSDART00000149145
11_46285536_46287226	1691	5.057	0.00038	7.234	6e-06	0.00257138	0.000186844	up	up		Promoter	ENSDART00000125719	Uncharacterized protein [Source:UniProtKB/TrEMBL;Acc:E7F5D4]	ENSDARG00000089443
11_5899574_5900497	924	5.057	0.00038	7.234	6e-06	0.00257138	0.000186844	up	up		Promoter	ENSDART00000141825
11_628759_629352	594	5.057	0.00038	8.065	1e-06	0.00257138	5.13631e-05	up	up		Promoter	ENSDART00000039950	peroxisome proliferator activated receptor gamma [Source:ZFIN;Acc:ZDB-GENE-990415-213]	ENSDARG00000031848
12_11129244_11130333	1090	7.085	7e-06	8.481	1e-06	0.000161553	5.13631e-05	up	up		Promoter	ENSDART00000078497	solute carrier family 4, anion exchanger, member 1b [Source:ZFIN;Acc:ZDB-GENE-110215-2]	ENSDARG00000024560
12_16323803_16324390	588	4.651	0.000835	6.403	3e-05	0.00420871	0.000560422	up	up		Promoter	ENSDART00000147422	Rho GTPase activating protein 23b [Source:ZFIN;Acc:ZDB-GENE-081031-78]	ENSDARG00000026840
12_2917867_2918801	935	4.245	0.001836	6.403	3e-05	0.00753688	0.000560422	up	up		Promoter	ENSDART00000129796
12_32879146_32879995	850	5.462	0.000173	6.403	3e-05	0.00149083	0.000560422	up	up		Promoter	ENSDART00000117664
12_3847495_3848699	1205	7.491	3e-06	5.987	6.7e-05	8.33073e-05	0.00090835	up	up		Promoter	ENSDART00000074692	si:ch1073-13h15.3 [Source:ZFIN;Acc:ZDB-GENE-121214-245]	ENSDARG00000052772
12_3985719_3986509	791	6.679	1.6e-05	9.728	0	0.000301041	0	up	up		Promoter	ENSDART00000126772	Uncharacterized protein [Source:UniProtKB/TrEMBL;Acc:E7F620]	ENSDARG00000086308
12_4592513_4593670	1158	7.896	2e-06	12.637	0	6.10614e-05	0	up	up		Promoter	ENSDART00000013465	T-box gene 6 [Source:ZFIN;Acc:ZDB-GENE-020416-5]	ENSDARG00000011785
12_48014866_48015675	810	4.651	0.000835	5.987	6.7e-05	0.00420871	0.00090835	up	up		Promoter	ENSDART00000134428
12_48066944_48067583	640	5.868	7.9e-05	5.987	6.7e-05	0.000847656	0.00090835	up	up		Promoter	ENSDART00000114866	ornithine aminotransferase [Source:ZFIN;Acc:ZDB-GENE-110411-148]	ENSDARG00000078425
12_49923378_49924438	1061	11.142	0	14.299	0	0	0	up	up		Promoter	ENSDART00000050258	zgc:165653 [Source:ZFIN;Acc:ZDB-GENE-070620-24]	ENSDARG00000071292
12_5449231_5450784	1554	37.105	0	41.313	0	0	0	up	up		Promoter	ENSDART00000092687	transient receptor potential cation channel, subfamily M, member 4 [Source:HGNC Symbol;Acc:17993]	ENSDARG00000063435
12_5931798_5932660	863	5.462	0.000173	6.403	3e-05	0.00149083	0.000560422	up	up		Promoter	ENSDART00000129644	pleckstrin homology domain containing, family M (with RUN domain) member 1 [Source:ZFIN;Acc:ZDB-GENE-030131-2752]	ENSDARG00000063247
12_7832281_7833194	914	5.057	0.00038	5.987	6.7e-05	0.00257138	0.00090835	up	up		Promoter	ENSDART00000152274	si:dkey-187i8.2 [Source:ZFIN;Acc:ZDB-GENE-121214-181]	ENSDARG00000096624
12_8485984_8487314	1331	5.462	0.000173	6.403	3e-05	0.00149083	0.000560422	up	up		Promoter	ENSDART00000148673	ankyrin 3b [Source:ZFIN;Acc:ZDB-GENE-060621-2]	ENSDARG00000077582
12_9259183_9259688	506	9.519	0	15.546	0	0	0	up	up		Promoter	ENSDART00000135865	early growth response 2b [Source:ZFIN;Acc:ZDB-GENE-980526-283]	ENSDARG00000042826
13_17774858_17775265	408	5.057	0.00038	6.403	3e-05	0.00257138	0.000560422	up	up		Promoter	ENSDART00000126016	voltage-dependent anion channel 2 [Source:ZFIN;Acc:ZDB-GENE-030131-845]	ENSDARG00000013623
13_23102473_23103370	898	5.462	0.000173	6.403	3e-05	0.00149083	0.000560422	up	up		Promoter	ENSDART00000057641	tetraspanin 15 [Source:ZFIN;Acc:ZDB-GENE-050417-295]	ENSDARG00000039455
13_23203658_23204341	684	6.274	3.6e-05	6.818	1.4e-05	0.000516781	0.000337922	up	up		Promoter	ENSDART00000136621
13_31573151_31573659	509	4.651	0.000835	7.234	6e-06	0.00420871	0.000186844	up	up		Promoter	ENSDART00000145887	ribosomal RNA processing 12 homolog (S. cerevisiae) [Source:ZFIN;Acc:ZDB-GENE-050706-182]	ENSDARG00000022410
13_35444064_35444599	536	5.462	0.000173	6.403	3e-05	0.00149083	0.000560422	up	up		Promoter	ENSDART00000135333
13_36935451_36936286	836	6.679	1.6e-05	10.974	0	0.000301041	0	up	up		Promoter	ENSDART00000149607
13_37202354_37202725	372	5.462	0.000173	5.156	0.000333	0.00149083	0.00285629	up	up		Promoter	ENSDART00000121782	salvador homolog 1 (Drosophila) [Source:ZFIN;Acc:ZDB-GENE-040912-28]	ENSDARG00000006196
13_44228676_44230127	1452	12.359	0	8.065	1e-06	0	5.13631e-05	up	up		Promoter	ENSDART00000084416	actin binding LIM protein 1a [Source:ZFIN;Acc:ZDB-GENE-080219-41]	ENSDARG00000060149
13_47308372_47310111	1740	6.274	3.6e-05	7.65	3e-06	0.000516781	0.000119495	up	up		Promoter	ENSDART00000004666	transmembrane protein 63Ba [Source:ZFIN;Acc:ZDB-GENE-030131-4320]	ENSDARG00000003836
13_48829912_48830821	910	5.462	0.000173	5.987	6.7e-05	0.00149083	0.00090835	up	up		Promoter	ENSDART00000105018	Uncharacterized protein [Source:UniProtKB/TrEMBL;Acc:F1Q8P1]	ENSDARG00000071165
13_53815161_53816751	1591	2.129	0.000681	2.052	0.001301	0.00420045	0.00764968	up	up		Promoter	ENSDART00000109662	Uncharacterized protein [Source:UniProtKB/TrEMBL;Acc:F1Q6Z8]	ENSDARG00000079971
13_53936711_53939095	2385	4.651	0.000835	5.572	0.000149	0.00420871	0.00159778	up	up		Promoter	ENSDART00000121457	limb bud and heart development [Source:HGNC Symbol;Acc:29532]	ENSDARG00000087377
13_8678879_8679286	408	6.274	3.6e-05	4.74	0.000741	0.000516781	0.0047841	up	up		Promoter	ENSDART00000058056	mitochondrial ribosomal protein S26 [Source:ZFIN;Acc:ZDB-GENE-040718-115]	ENSDARG00000039719
13_8824358_8825287	930	4.245	0.001836	13.052	0	0.00753688	0	up	up		Promoter	ENSDART00000078361
13_9114862_9115932	1071	5.057	0.00038	15.962	0	0.00257138	0	up	up		Promoter	ENSDART00000140704
14_1110899_1111400	502	5.057	0.00038	4.74	0.000741	0.00257138	0.0047841	up	up		Promoter	ENSDART00000106708	SEC24 family, member B (S. cerevisiae) [Source:HGNC Symbol;Acc:10704]	ENSDARG00000071906
14_1372777_1373620	844	5.868	7.9e-05	6.818	1.4e-05	0.000847656	0.000337922	up	up		Promoter	ENSDART00000083797	TBC1 domain family, member 9B (with GRAM domain) [Source:HGNC Symbol;Acc:29097]	ENSDARG00000043627
14_19601129_19601876	748	7.085	7e-06	9.728	0	0.000161553	0	up	up		Promoter	ENSDART00000106460	neuralized homolog 1B (Drosophila) [Source:ZFIN;Acc:ZDB-GENE-050522-102]	ENSDARG00000029452
14_214882_215709	828	6.679	1.6e-05	8.481	1e-06	0.000301041	5.13631e-05	up	up	Y	Promoter	ENSDART00000051890	MCM7 minichromosome maintenance deficient 7 (S. cerevisiae) [Source:ZFIN;Acc:ZDB-GENE-020419-27]	ENSDARG00000035761
14_23401156_23402195	1040	7.896	2e-06	8.896	0	6.10614e-05	0	up	up		Promoter	ENSDART00000124072	ATPase, Cu++ transporting, alpha polypeptide [Source:ZFIN;Acc:ZDB-GENE-060825-45]	ENSDARG00000003699
14_23450099_23451320	1222	5.462	0.000173	6.403	3e-05	0.00149083	0.000560422	up	up		Promoter	ENSDART00000108585	sosondowah ankyrin repeat domain family member A [Source:HGNC Symbol;Acc:27033]	ENSDARG00000079125
14_27555209_27555958	750	4.651	0.000835	10.143	0	0.00420871	0	up	up		Promoter	ENSDART00000105932	si:dkeyp-110e4.11 [Source:ZFIN;Acc:ZDB-GENE-070424-267]	ENSDARG00000071585
14_2946094_2947095	1002	6.679	1.6e-05	5.572	0.000149	0.000301041	0.00159778	up	up		Promoter	ENSDART00000114039	protocadherin 2 gamma 16 [Source:ZFIN;Acc:ZDB-GENE-050610-6]	ENSDARG00000079640
14_30817742_30818962	1221	7.085	7e-06	8.065	1e-06	0.000161553	5.13631e-05	up	up		Promoter	ENSDART00000133345	family with sequence similarity 149, member A [Source:HGNC Symbol;Acc:24527]	ENSDARG00000073709
14_33701636_33702975	1340	5.462	0.000173	6.403	3e-05	0.00149083	0.000560422	up	up		Promoter	ENSDART00000075617	SRY-box containing gene 3 [Source:ZFIN;Acc:ZDB-GENE-980526-333]	ENSDARG00000053569
14_36559874_36560506	633	5.868	7.9e-05	10.143	0	0.000847656	0	up	up		Promoter	ENSDART00000129676	LSM11, U7 small nuclear RNA associated [Source:ZFIN;Acc:ZDB-GENE-050309-124]	ENSDARG00000090854
14_4359657_4360895	1239	4.245	0.001836	5.156	0.000333	0.00753688	0.00285629	up	up		Promoter	ENSDART00000114900	Uncharacterized protein [Source:UniProtKB/TrEMBL;Acc:E7F6D2]	ENSDARG00000079429
14_51409417_51410222	806	4.651	0.000835	7.234	6e-06	0.00420871	0.000186844	up	up		Promoter	ENSDART00000149667	nuclear receptor binding SET domain protein 1a [Source:ZFIN;Acc:ZDB-GENE-080519-3]	ENSDARG00000060016
14_6430917_6431988	1072	8.302	1e-06	7.234	6e-06	3.60083e-05	0.000186844	up	up		Promoter	ENSDART00000148461	ATP-binding cassette, sub-family A (ABC1), member 1B [Source:ZFIN;Acc:ZDB-GENE-030131-9826]	ENSDARG00000079009
14_7708745_7709797	1053	5.868	7.9e-05	6.818	1.4e-05	0.000847656	0.000337922	up	up		Promoter	ENSDART00000119237
15_14420032_14420435	404	7.491	3e-06	6.818	1.4e-05	8.33073e-05	0.000337922	up	up		Promoter	ENSDART00000049831	dehydrogenase/reductase (SDR family) member 11b [Source:ZFIN;Acc:ZDB-GENE-040625-155]	ENSDARG00000031299
15_20477491_20481756	4266	422.087	0	318.103	0	0	0	up	up		Promoter	ENSDART00000006248	Uncharacterized protein [Source:UniProtKB/TrEMBL;Acc:F1RCJ7]	ENSDARG00000002738
15_23290781_23291413	633	4.651	0.000835	5.572	0.000149	0.00420871	0.00159778	up	up		Promoter	ENSDART00000137569	amyloid beta precursor protein (cytoplasmic tail) binding protein 2 [Source:ZFIN;Acc:ZDB-GENE-030131-1715]	ENSDARG00000007566
15_28711820_28712561	742	4.651	0.000835	6.818	1.4e-05	0.00420871	0.000337922	up	up		Promoter	ENSDART00000126196	guanylate cyclase 2F, retinal [Source:ZFIN;Acc:ZDB-GENE-011128-7]	ENSDARG00000025504
15_30666344_30668037	1694	6.679	1.6e-05	12.637	0	0.000301041	0	up	up		Promoter	ENSDART00000125585	odorant receptor, family D, subfamily 111, member 3 [Source:ZFIN;Acc:ZDB-GENE-010308-17]	ENSDARG00000086633
15_30751192_30751922	731	5.868	7.9e-05	6.403	3e-05	0.000847656	0.000560422	up	up		Promoter	ENSDART00000129404	si:ch73-366i20.1 [Source:ZFIN;Acc:ZDB-GENE-070912-338]	ENSDARG00000041007
15_33861598_33862017	420	4.651	0.000835	5.156	0.000333	0.00420871	0.00285629	up	up		Promoter	ENSDART00000134522
15_33884809_33885762	954	7.085	7e-06	7.65	3e-06	0.000161553	0.000119495	up	up		Promoter	ENSDART00000099776	tetraspanin 13a [Source:ZFIN;Acc:ZDB-GENE-040718-19]	ENSDARG00000068883
15_40959946_40960514	569	5.462	0.000173	4.74	0.000741	0.00149083	0.0047841	up	up		Promoter	ENSDART00000089694	T-cell lymphoma invasion and metastasis 1 [Source:HGNC Symbol;Acc:11805]	ENSDARG00000025920
15_41632108_41633007	900	7.491	3e-06	12.221	0	8.33073e-05	0	up	up		Promoter	ENSDART00000063721	solute carrier family 8 (sodium-calcium exchanger), member 2b [Source:ZFIN;Acc:ZDB-GENE-050419-209]	ENSDARG00000040625
15_44181433_44182397	965	6.679	1.6e-05	10.143	0	0.000301041	0	up	up		Promoter	ENSDART00000081555	Uncharacterized protein [Source:UniProtKB/TrEMBL;Acc:E7F041]	ENSDARG00000091088
15_44536334_44538131	1798	5.057	0.00038	6.403	3e-05	0.00257138	0.000560422	up	up		Promoter	ENSDART00000017474	Uncharacterized protein [Source:UniProtKB/TrEMBL;Acc:E7F4I4]	ENSDARG00000077766
15_6440317_6441242	926	4.245	0.001836	4.74	0.000741	0.00753688	0.0047841	up	up		Promoter	ENSDART00000120374
16_10258792_10260361	1570	6.274	3.6e-05	5.572	0.000149	0.000516781	0.00159778	up	up		Promoter	ENSDART00000120023
16_12666107_12667813	1707	6.679	1.6e-05	5.987	6.7e-05	0.000301041	0.00090835	up	up		Promoter	ENSDART00000141032	POU domain, class 2, transcription factor 2b [Source:ZFIN;Acc:ZDB-GENE-060310-1]	ENSDARG00000019658
16_1356859_1357688	830	8.302	1e-06	5.156	0.000333	3.60083e-05	0.00285629	up	up		Promoter	ENSDART00000024206	cugbp, Elav-like family member 3b [Source:ZFIN;Acc:ZDB-GENE-110408-50]	ENSDARG00000006983
16_13926090_13928075	1986	5.462	0.000173	5.156	0.000333	0.00149083	0.00285629	up	up		Promoter	ENSDART00000110567	calsyntenin 3 [Source:ZFIN;Acc:ZDB-GENE-100921-73]	ENSDARG00000073883
16_14049422_14050275	854	7.085	7e-06	5.987	6.7e-05	0.000161553	0.00090835	up	up		Promoter	ENSDART00000116381
16_15175593_15176621	1029	5.868	7.9e-05	7.234	6e-06	0.000847656	0.000186844	up	up		Promoter	ENSDART00000114944	zgc:101640 [Source:ZFIN;Acc:ZDB-GENE-041114-158]	ENSDARG00000022807
16_15394495_15395976	1482	4.651	0.000835	7.234	6e-06	0.00420871	0.000186844	up	up		Promoter	ENSDART00000090377	shisa homolog 7 (Xenopus laevis) [Source:HGNC Symbol;Acc:35409]	ENSDARG00000062462
16_19097200_19098733	1534	7.896	2e-06	5.156	0.000333	6.10614e-05	0.00285629	up	up		Promoter	ENSDART00000138715
16_19193408_19194220	813	7.085	7e-06	7.234	6e-06	0.000161553	0.000186844	up	up		Promoter	ENSDART00000136504
16_20212763_20213738	976	9.113	0	10.143	0	0	0	up	up		Promoter	ENSDART00000127093	si:dkeyp-13d11.1 [Source:ZFIN;Acc:ZDB-GENE-090313-377]	ENSDARG00000091144
16_21696088_21696853	766	9.519	0	8.896	0	0	0	up	up		Promoter	ENSDART00000123849	transmembrane protein 196b [Source:ZFIN;Acc:ZDB-GENE-110914-248]	ENSDARG00000090140
16_21723536_21724681	1146	5.462	0.000173	6.818	1.4e-05	0.00149083	0.000337922	up	up		Promoter	ENSDART00000130962
16_23018669_23019516	848	6.274	3.6e-05	7.234	6e-06	0.000516781	0.000186844	up	up		Promoter	ENSDART00000052660	src kinase associated phosphoprotein 2 [Source:ZFIN;Acc:ZDB-GENE-030616-438]	ENSDARG00000000906
16_26124893_26125359	467	5.462	0.000173	6.818	1.4e-05	0.00149083	0.000337922	up	up		Promoter	ENSDART00000132243	oxidative stress induced growth inhibitor family member 2 [Source:ZFIN;Acc:ZDB-GENE-081028-57]	ENSDARG00000040302
16_26437465_26438390	926	5.868	7.9e-05	6.403	3e-05	0.000847656	0.000560422	up	up		Promoter	ENSDART00000048599	ribosomal protein S19 [Source:ZFIN;Acc:ZDB-GENE-040426-1716]	ENSDARG00000030602
16_26562066_26562858	793	7.491	3e-06	7.234	6e-06	8.33073e-05	0.000186844	up	up		Promoter	ENSDART00000111564	cell adhesion molecule 4 [Source:ZFIN;Acc:ZDB-GENE-041114-138]	ENSDARG00000040291
16_28698812_28699883	1072	21.284	0	7.65	3e-06	0	0.000119495	up	up		Promoter	ENSDART00000039746	erythrocyte membrane protein band 4.1b (elliptocytosis 1, RH-linked) [Source:ZFIN;Acc:ZDB-GENE-030130-1]	ENSDARG00000029019
16_29400932_29401603	672	6.679	1.6e-05	8.065	1e-06	0.000301041	5.13631e-05	up	up		Promoter	ENSDART00000103407	transmembrane protein 245 [Source:ZFIN;Acc:ZDB-GENE-100922-188]	ENSDARG00000070455
16_29596143_29597088	946	7.896	2e-06	6.403	3e-05	6.10614e-05	0.000560422	up	up		Promoter	ENSDART00000143124
16_32904741_32905591	851	7.085	7e-06	7.65	3e-06	0.000161553	0.000119495	up	up		Promoter	ENSDART00000058785	family with sequence similarity 210, member A [Source:ZFIN;Acc:ZDB-GENE-050306-43]	ENSDARG00000040186
16_33075833_33076278	446	6.679	1.6e-05	6.818	1.4e-05	0.000301041	0.000337922	up	up		Promoter	ENSDART00000134302
16_34169446_34170556	1111	6.274	3.6e-05	5.156	0.000333	0.000516781	0.00285629	up	up		Promoter	ENSDART00000114864	complement component 1, s subcomponent [Source:HGNC Symbol;Acc:1247]	ENSDARG00000075719
16_35654066_35654824	759	7.491	3e-06	7.234	6e-06	8.33073e-05	0.000186844	up	up		Promoter	ENSDART00000125290
16_38076596_38077400	805	8.302	1e-06	6.403	3e-05	3.60083e-05	0.000560422	up	up		Promoter	ENSDART00000109703	collagen, type VI, alpha 6 [Source:ZFIN;Acc:ZDB-GENE-041111-303]	ENSDARG00000079752
16_38155780_38156647	868	6.274	3.6e-05	7.65	3e-06	0.000516781	0.000119495	up	up		Promoter	ENSDART00000133310	phosphoinositide-3-kinase, regulatory subunit 4 [Source:ZFIN;Acc:ZDB-GENE-050309-84]	ENSDARG00000060469
16_41467703_41469441	1739	9.113	0	6.403	3e-05	0	0.000560422	up	up		Promoter	ENSDART00000124135	transmembrane protein 74 [Source:HGNC Symbol;Acc:26409]	ENSDARG00000091623
16_42552387_42553163	777	6.274	3.6e-05	6.818	1.4e-05	0.000516781	0.000337922	up	up		Promoter	ENSDART00000119207
16_51282562_51283249	688	5.462	0.000173	6.818	1.4e-05	0.00149083	0.000337922	up	up		Promoter	ENSDART00000148564	CUB and Sushi multiple domains 3 [Source:HGNC Symbol;Acc:19291]	ENSDARG00000077905
16_52298035_52299322	1288	6.679	1.6e-05	5.156	0.000333	0.000301041	0.00285629	up	up		Promoter	ENSDART00000125442	raftlin, lipid raft linker 1 [Source:HGNC Symbol;Acc:30278]	ENSDARG00000086499
16_57620792_57621809	1018	6.274	3.6e-05	8.065	1e-06	0.000516781	5.13631e-05	up	up		Promoter	ENSDART00000100602	cyclin-dependent kinase 14 [Source:HGNC Symbol;Acc:8883]	ENSDARG00000074665
17_1033243_1034409	1167	5.057	0.00038	5.987	6.7e-05	0.00257138	0.00090835	up	up	Y	Promoter	ENSDART00000113535	zinc finger and BTB domain containing 42 [Source:HGNC Symbol;Acc:32550]	ENSDARG00000074455
17_23086931_23088105	1175	5.057	0.00038	5.987	6.7e-05	0.00257138	0.00090835	up	up		Promoter	ENSDART00000055756	TBC1 domain family, member 12a [Source:ZFIN;Acc:ZDB-GENE-030131-3920]	ENSDARG00000038237
17_23167804_23169184	1381	5.057	0.00038	8.065	1e-06	0.00257138	5.13631e-05	up	up		Promoter	ENSDART00000118218
17_23178769_23179561	793	5.057	0.00038	6.403	3e-05	0.00257138	0.000560422	up	up		Promoter	ENSDART00000119034
17_23199173_23200230	1058	4.245	0.001836	4.325	0.001651	0.00753688	0.00813572	up	up		Promoter	ENSDART00000116779
17_23203124_23204316	1193	4.245	0.001836	5.156	0.000333	0.00753688	0.00285629	up	up		Promoter	ENSDART00000116606
17_23211770_23212666	897	5.868	7.9e-05	5.987	6.7e-05	0.000847656	0.00090835	up	up		Promoter	ENSDART00000116733
17_25122443_25122977	535	6.679	1.6e-05	5.987	6.7e-05	0.000301041	0.00090835	up	up		Promoter	ENSDART00000082324	zona pellucida protein C [Source:ZFIN;Acc:ZDB-GENE-040824-1]	ENSDARG00000059252
17_25323094_25324096	1003	4.245	0.001836	4.74	0.000741	0.00753688	0.0047841	up	up		Promoter	ENSDART00000139451	absent in melanoma 1a [Source:ZFIN;Acc:ZDB-GENE-041008-100]	ENSDARG00000031782
17_27259279_27260206	928	5.462	0.000173	4.325	0.001651	0.00149083	0.00813572	up	up		Promoter	ENSDART00000116203
17_281262_282509	1248	4.651	0.000835	8.481	1e-06	0.00420871	5.13631e-05	up	up	Y	Promoter	ENSDART00000114685	kelch domain containing 2 [Source:HGNC Symbol;Acc:20231]	ENSDARG00000078852
17_28226904_28227944	1041	5.462	0.000173	5.156	0.000333	0.00149083	0.00285629	up	up		Promoter	ENSDART00000042501	5-hydroxytryptamine (serotonin) receptor 1bd [Source:ZFIN;Acc:ZDB-GENE-090409-3]	ENSDARG00000054124
17_29176662_29178452	1791	2.29	1.1e-05	2.029	0.000332	0.000233713	0.00285629	up	up		Promoter	ENSDART00000104204	forkhead box G1a [Source:ZFIN;Acc:ZDB-GENE-990415-267]	ENSDARG00000070769
17_43564622_43565119	498	5.462	0.000173	4.74	0.000741	0.00149083	0.0047841	up	up		Promoter	ENSDART00000133665	mitochondrial ribosomal protein L35 [Source:ZFIN;Acc:ZDB-GENE-060929-1082]	ENSDARG00000070589
17_47070979_47071432	454	7.896	2e-06	12.637	0	6.10614e-05	0	up	up		Promoter	ENSDART00000127296	Uncharacterized protein [Source:UniProtKB/TrEMBL;Acc:F1QSX0]	ENSDARG00000091445
17_50959106_50959962	857	6.679	1.6e-05	5.156	0.000333	0.000301041	0.00285629	up	up		Promoter	ENSDART00000124639	Uncharacterized protein [Source:UniProtKB/TrEMBL;Acc:E7F1X9]	ENSDARG00000088298
17_66449_67121	673	5.057	0.00038	6.403	3e-05	0.00257138	0.000560422	up	up		Promoter	ENSDART00000127142	Uncharacterized protein [Source:UniProtKB/TrEMBL;Acc:E7FCA7]	ENSDARG00000089978
17_7553290_7554001	712	4.245	0.001836	4.74	0.000741	0.00753688	0.0047841	up	up		Promoter	ENSDART00000043351
17_8769192_8769592	401	5.057	0.00038	4.74	0.000741	0.00257138	0.0047841	up	up		Promoter	ENSDART00000036668	proteasome (prosome, macropain) 26S subunit, ATPase, 1a [Source:ZFIN;Acc:ZDB-GENE-030131-8730]	ENSDARG00000030537
18_28316104_28317665	1562	6.679	1.6e-05	6.818	1.4e-05	0.000301041	0.000337922	up	up		Promoter	ENSDART00000136201	si:ch211-174j14.2 [Source:ZFIN;Acc:ZDB-GENE-050419-63]	ENSDARG00000093015
18_31166454_31166865	412	4.245	0.001836	5.156	0.000333	0.00753688	0.00285629	up	up		Promoter	ENSDART00000150608	differentially expressed in FDCP 8 homolog (mouse) [Source:ZFIN;Acc:ZDB-GENE-041114-96]	ENSDARG00000096158
18_33571427_33571937	511	7.085	7e-06	6.818	1.4e-05	0.000161553	0.000337922	up	up		Promoter	ENSDART00000129624	transforming growth factor beta regulator 1 [Source:ZFIN;Acc:ZDB-GENE-080220-62]	ENSDARG00000074996
18_38086976_38087712	737	5.462	0.000173	8.065	1e-06	0.00149083	5.13631e-05	up	up		Promoter	ENSDART00000087960	collomin [Source:ZFIN;Acc:ZDB-GENE-050119-4]	ENSDARG00000061576
18_43063700_43064869	1170	7.491	3e-06	7.65	3e-06	8.33073e-05	0.000119495	up	up		Promoter	ENSDART00000059063	EH-domain containing 2 [Source:ZFIN;Acc:ZDB-GENE-030131-9347]	ENSDARG00000040362
18_48074223_48074733	511	4.651	0.000835	7.234	6e-06	0.00420871	0.000186844	up	up		Promoter	ENSDART00000086350	si:ch211-136a13.1 [Source:ZFIN;Acc:ZDB-GENE-050419-214]	ENSDARG00000060927
18_49783329_49787341	4013	2.714	3.8e-05	2.777	3.4e-05	0.000544615	0.000605695	up	up		Promoter	ENSDART00000025746	reelin, like [Source:ZFIN;Acc:ZDB-GENE-040427-1]	ENSDARG00000077935
18_5016360_5016845	486	5.057	0.00038	6.818	1.4e-05	0.00257138	0.000337922	up	up		Promoter	ENSDART00000109230	unc-51-like kinase 3 (C. elegans) [Source:ZFIN;Acc:ZDB-GENE-070410-33]	ENSDARG00000075200
18_6185507_6186285	779	5.868	7.9e-05	5.987	6.7e-05	0.000847656	0.00090835	up	up		Promoter	ENSDART00000003748	chromosome 15 open reading frame 26 [Source:HGNC Symbol;Acc:26782]	ENSDARG00000018281
18_7002148_7002814	667	4.651	0.000835	5.572	0.000149	0.00420871	0.00159778	up	up		Promoter	ENSDART00000133541	si:dkey-30c15.2 [Source:ZFIN;Acc:ZDB-GENE-060503-543]	ENSDARG00000069540
18_7449924_7450742	819	4.245	0.001836	5.572	0.000149	0.00753688	0.00159778	up	up		Promoter	ENSDART00000117079
19_17520884_17522010	1127	6.274	3.6e-05	6.403	3e-05	0.000516781	0.000560422	up	up		Promoter	ENSDART00000151645	adaptor-related protein complex 1, mu 1 subunit [Source:ZFIN;Acc:ZDB-GENE-110126-1]	ENSDARG00000096249
19_19221613_19222448	836	9.113	0	4.325	0.001651	0	0.00813572	up	up		Promoter	ENSDART00000138905	homeo box A3a [Source:ZFIN;Acc:ZDB-GENE-000823-3]	ENSDARG00000036231
19_19338045_19338893	849	7.491	3e-06	6.403	3e-05	8.33073e-05	0.000560422	up	up		Promoter	ENSDART00000147608	even-skipped homeobox 1 [Source:ZFIN;Acc:ZDB-GENE-980526-364]	ENSDARG00000005628
19_19963946_19964833	888	5.462	0.000173	5.156	0.000333	0.00149083	0.00285629	up	up		Promoter	ENSDART00000126298	integrator complex subunit 8 [Source:ZFIN;Acc:ZDB-GENE-050522-556]	ENSDARG00000057986
19_21273267_21273681	415	9.113	0	4.325	0.001651	0	0.00813572	up	up		Promoter	ENSDART00000014774	thioredoxin-like 4A [Source:ZFIN;Acc:ZDB-GENE-041010-25]	ENSDARG00000036190
19_26181050_26181723	674	8.302	1e-06	6.403	3e-05	3.60083e-05	0.000560422	up	up		Promoter	ENSDART00000002547	biogenesis of lysosomal organelles complex-1, subunit 4, cappuccino [Source:ZFIN;Acc:ZDB-GENE-040801-215]	ENSDARG00000007597
19_35096501_35097198	698	6.274	3.6e-05	8.896	0	0.000516781	0	up	up		Promoter	ENSDART00000151521	runt-related transcription factor 1; translocated to, 1 (cyclin D-related) [Source:ZFIN;Acc:ZDB-GENE-060929-164]	ENSDARG00000003680
19_36586992_36587546	555	5.868	7.9e-05	8.896	0	0.000847656	0	up	up		Promoter	ENSDART00000103253	bone morphogenetic protein 8a [Source:ZFIN;Acc:ZDB-GENE-030912-13]	ENSDARG00000035677
19_37015903_37016373	471	8.302	1e-06	4.74	0.000741	3.60083e-05	0.0047841	up	up		Promoter	ENSDART00000131786
19_40674815_40675999	1185	5.057	0.00038	4.74	0.000741	0.00257138	0.0047841	up	up		Promoter	ENSDART00000130846	brain-specific angiogenesis inhibitor 2 [Source:HGNC Symbol;Acc:944]	ENSDARG00000088161
19_46872149_46873028	880	4.245	0.001836	6.403	3e-05	0.00753688	0.000560422	up	up		Promoter	ENSDART00000060242	protein tyrosine phosphatase, receptor type, O [Source:ZFIN;Acc:ZDB-GENE-070424-54]	ENSDARG00000022297
19_48090132_48090894	763	4.245	0.001836	8.896	0	0.00753688	0	up	up		Promoter	ENSDART00000052434	eukaryotic translation initiation factor 3, subunit H, b [Source:ZFIN;Acc:ZDB-GENE-051030-42]	ENSDARG00000036116
19_49184038_49185327	1290	4.245	0.001836	5.156	0.000333	0.00753688	0.00285629	up	up		Promoter	ENSDART00000141437	syndecan 2 [Source:ZFIN;Acc:ZDB-GENE-021206-3]	ENSDARG00000002731
19_49358830_49359363	534	4.651	0.000835	4.74	0.000741	0.00420871	0.0047841	up	up		Promoter	ENSDART00000025931	transcription factor AP-2 epsilon [Source:ZFIN;Acc:ZDB-GENE-040426-1455]	ENSDARG00000008861
19_5514572_5515380	809	7.085	7e-06	6.403	3e-05	0.000161553	0.000560422	up	up		Promoter	ENSDART00000150969	cyclin-dependent kinase 12 [Source:ZFIN;Acc:ZDB-GENE-081104-294]	ENSDARG00000063726
19_5749288_5750054	767	8.708	0	5.987	6.7e-05	0	0.00090835	up	up		Promoter	ENSDART00000151246
19_7516146_7516537	392	5.057	0.00038	5.572	0.000149	0.00257138	0.00159778	up	up		Promoter	ENSDART00000143117	zgc:162972 [Source:ZFIN;Acc:ZDB-GENE-070424-49]	ENSDARG00000076134
19_8064848_8065813	966	6.274	3.6e-05	6.403	3e-05	0.000516781	0.000560422	up	up		Promoter	ENSDART00000003544	GA repeat binding protein, beta 2a [Source:ZFIN;Acc:ZDB-GENE-030131-5733]	ENSDARG00000007943
19_8548590_8549328	739	4.651	0.000835	8.065	1e-06	0.00420871	5.13631e-05	up	up		Promoter	ENSDART00000147015	si:dkey-266f7.4 [Source:ZFIN;Acc:ZDB-GENE-070705-436]	ENSDARG00000092728
19_9926940_9928397	1458	5.462	0.000173	5.156	0.000333	0.00149083	0.00285629	up	up		Promoter	ENSDART00000136241	si:ch73-15n24.1 [Source:ZFIN;Acc:ZDB-GENE-030131-1323]	ENSDARG00000079901
2_12165885_12166557	673	5.057	0.00038	5.987	6.7e-05	0.00257138	0.00090835	up	up		Promoter	ENSDART00000135867
2_18548446_18549614	1169	7.085	7e-06	6.403	3e-05	0.000161553	0.000560422	up	up		Promoter	ENSDART00000146098	si:dkey-236a14.10 [Source:ZFIN;Acc:ZDB-GENE-070912-459]	ENSDARG00000092075
2_18839432_18840271	840	5.057	0.00038	7.65	3e-06	0.00257138	0.000119495	up	up		Promoter	ENSDART00000125531	lipid phosphate phosphatase-related protein type 5a [Source:ZFIN;Acc:ZDB-GENE-070705-281]	ENSDARG00000057209
2_19321759_19322185	427	6.679	1.6e-05	5.987	6.7e-05	0.000301041	0.00090835	up	up		Promoter	ENSDART00000140607	kinocilin [Source:HGNC Symbol;Acc:26488]	ENSDARG00000095506
2_21607381_21608474	1094	9.113	0	7.65	3e-06	0	0.000119495	up	up		Promoter	ENSDART00000016208	chromodomain helicase DNA binding protein 7 [Source:ZFIN;Acc:ZDB-GENE-070912-179]	ENSDARG00000075211
2_23487195_23487903	709	6.679	1.6e-05	6.818	1.4e-05	0.000301041	0.000337922	up	up		Promoter	ENSDART00000135323	nuclear receptor subfamily 2, group F, member 6a [Source:ZFIN;Acc:ZDB-GENE-030131-4362]	ENSDARG00000003607
2_24219534_24220621	1088	5.868	7.9e-05	7.65	3e-06	0.000847656	0.000119495	up	up		Promoter	ENSDART00000132328	chromodomain protein, Y-like [Source:ZFIN;Acc:ZDB-GENE-070912-561]	ENSDARG00000038985
2_26619617_26620126	510	5.462	0.000173	5.156	0.000333	0.00149083	0.00285629	up	up		Promoter	ENSDART00000099247	Rab geranylgeranyltransferase, beta subunit [Source:ZFIN;Acc:ZDB-GENE-040426-2116]	ENSDARG00000068587
2_32279091_32280143	1053	4.245	0.001836	6.403	3e-05	0.00753688	0.000560422	up	up		Promoter	ENSDART00000140026	SWI/SNF related, matrix associated, actin dependent regulator of chromatin, subfamily d, member 3a [Source:ZFIN;Acc:ZDB-GENE-070912-491]	ENSDARG00000038786
2_3580167_3580787	621	4.245	0.001836	5.987	6.7e-05	0.00753688	0.00090835	up	up		Promoter	ENSDART00000128558	intracisternal A particle-promoted polypeptide [Source:ZFIN;Acc:ZDB-GENE-080204-28]	ENSDARG00000088271
2_54087128_54088007	880	5.057	0.00038	4.325	0.001651	0.00257138	0.00813572	up	up		Promoter	ENSDART00000037557	anti-dorsalizing morphogenic protein [Source:ZFIN;Acc:ZDB-GENE-011214-1]	ENSDARG00000025372
2_57730326_57731799	1474	9.925	0	10.974	0	0	0	up	up		Promoter	ENSDART00000149005
2_58381936_58382509	574	5.868	7.9e-05	5.156	0.000333	0.000847656	0.00285629	up	up	Y	Promoter	ENSDART00000146672
2_59547236_59548265	1030	5.868	7.9e-05	6.403	3e-05	0.000847656	0.000560422	up	up		Promoter	ENSDART00000112354	Uncharacterized protein [Source:UniProtKB/TrEMBL;Acc:E7F178]	ENSDARG00000073679
2_7156268_7157214	947	7.085	7e-06	7.234	6e-06	0.000161553	0.000186844	up	up		Promoter	ENSDART00000124701	Uncharacterized protein [Source:UniProtKB/TrEMBL;Acc:E7FEK5]	ENSDARG00000091262
2_7763858_7764415	558	6.274	3.6e-05	7.65	3e-06	0.000516781	0.000119495	up	up		Promoter	ENSDART00000048840	eph receptor B3a [Source:ZFIN;Acc:ZDB-GENE-990415-60]	ENSDARG00000031548
2_7897817_7899002	1186	7.085	7e-06	8.896	0	0.000161553	0	up	up		Promoter	ENSDART00000123103	plastin 1 (I isoform) [Source:ZFIN;Acc:ZDB-GENE-030131-6205]	ENSDARG00000039272
2_8439245_8439705	461	4.245	0.001836	6.403	3e-05	0.00753688	0.000560422	up	up		Promoter	ENSDART00000120901
2_9663932_9664337	406	2.91	0.000314	3.165	0.000103	0.00242001	0.00139277	up	up		Promoter	ENSDART00000121175
2_9731424_9732815	1392	8.302	1e-06	5.572	0.000149	3.60083e-05	0.00159778	up	up		Promoter	ENSDART00000100696	tRNA splicing endonuclease 15 homolog (S. cerevisiae) [Source:ZFIN;Acc:ZDB-GENE-041008-211]	ENSDARG00000069280
20_10910471_10911235	765	6.679	1.6e-05	4.325	0.001651	0.000301041	0.00813572	up	up		Promoter	ENSDART00000147174
20_11911786_11912433	648	5.462	0.000173	5.987	6.7e-05	0.00149083	0.00090835	up	up		Promoter	ENSDART00000123585	si:ch211-155o21.3 [Source:ZFIN;Acc:ZDB-GENE-121214-24]	ENSDARG00000086518
20_17014139_17014805	667	5.057	0.00038	5.572	0.000149	0.00257138	0.00159778	up	up		Promoter	ENSDART00000148312	si:ch73-74h11.1 [Source:ZFIN;Acc:ZDB-GENE-091204-215]	ENSDARG00000062750
20_19136604_19137329	726	4.651	0.000835	8.065	1e-06	0.00420871	5.13631e-05	up	up		Promoter	ENSDART00000130271	SRY-box containing gene 7 [Source:ZFIN;Acc:ZDB-GENE-040109-4]	ENSDARG00000030125
20_20404845_20405903	1059	5.462	0.000173	6.403	3e-05	0.00149083	0.000560422	up	up		Promoter	ENSDART00000152759
20_23610542_23611055	514	5.462	0.000173	6.818	1.4e-05	0.00149083	0.000337922	up	up		Promoter	ENSDART00000147945	palladin, cytoskeletal associated protein [Source:ZFIN;Acc:ZDB-GENE-041014-252]	ENSDARG00000040009
20_25658654_25659299	646	4.245	0.001836	4.325	0.001651	0.00753688	0.00813572	up	up		Promoter	ENSDART00000126716	phosphoribosylaminoimidazole carboxylase, phosphoribosylaminoimidazole succinocarboxamide synthetase [Source:ZFIN;Acc:ZDB-GENE-030131-9762]	ENSDARG00000033539
20_30619796_30620317	522	4.245	0.001836	5.156	0.000333	0.00753688	0.00285629	up	up		Promoter	ENSDART00000153066	FGFR1 oncogene partner [Source:ZFIN;Acc:ZDB-GENE-090417-1]	ENSDARG00000003058
20_32505466_32506125	660	4.245	0.001836	5.156	0.000333	0.00753688	0.00285629	up	up		Promoter	ENSDART00000131813
20_34360733_34361410	678	4.651	0.000835	5.156	0.000333	0.00420871	0.00285629	up	up		Promoter	ENSDART00000135889
20_34561738_34562608	871	6.274	3.6e-05	10.559	0	0.000516781	0	up	up		Promoter	ENSDART00000152982	si:ch211-242b18.1 [Source:ZFIN;Acc:ZDB-GENE-030131-1518]	ENSDARG00000054723
20_34687464_34688039	576	5.868	7.9e-05	4.325	0.001651	0.000847656	0.00813572	up	up		Promoter	ENSDART00000132545	solute carrier family 25 (mitochondrial carrier; phosphate carrier), member 24 [Source:HGNC Symbol;Acc:20662]	ENSDARG00000008568
20_42472805_42474195	1391	4.245	0.001836	5.572	0.000149	0.00753688	0.00159778	up	up		Promoter	ENSDART00000061049	vestigial like 2 (Drosophila) [Source:HGNC Symbol;Acc:20232]	ENSDARG00000041706
20_48965575_48966420	846	5.057	0.00038	5.156	0.000333	0.00257138	0.00285629	up	up		Promoter	ENSDART00000137060
20_51886678_51887741	1064	6.274	3.6e-05	6.818	1.4e-05	0.000516781	0.000337922	up	up		Promoter	ENSDART00000074150	dispatched homolog 1 (Drosophila) [Source:ZFIN;Acc:ZDB-GENE-030911-7]	ENSDARG00000044417
20_52976409_52976943	535	7.085	7e-06	8.896	0	0.000161553	0	up	up		Promoter	ENSDART00000145283	si:ch211-221n20.1 [Source:ZFIN;Acc:ZDB-GENE-041014-227]	ENSDARG00000093187
20_53980466_53981772	1307	5.868	7.9e-05	4.74	0.000741	0.000847656	0.0047841	up	up		Promoter	ENSDART00000083427	solute carrier family 25, member 29 [Source:ZFIN;Acc:ZDB-GENE-050913-70]	ENSDARG00000057352
20_54775227_54775749	523	4.651	0.000835	5.156	0.000333	0.00420871	0.00285629	up	up		Promoter	ENSDART00000038745	YY1 transcription factor b [Source:ZFIN;Acc:ZDB-GENE-040426-2127]	ENSDARG00000027978
20_6237542_6238526	985	6.274	3.6e-05	8.896	0	0.000516781	0	up	up		Promoter	ENSDART00000147451	UDP-Gal:betaGlcNAc beta 1,4- galactosyltransferase, polypeptide 6 [Source:ZFIN;Acc:ZDB-GENE-040426-789]	ENSDARG00000010301
20_7092704_7093783	1080	7.085	7e-06	4.74	0.000741	0.000161553	0.0047841	up	up		Promoter	ENSDART00000144827	insulin-like growth factor binding protein 3 [Source:ZFIN;Acc:ZDB-GENE-040412-1]	ENSDARG00000014859
20_7809132_7809670	539	5.057	0.00038	5.156	0.000333	0.00257138	0.00285629	up	up		Promoter	ENSDART00000146297
20_9373652_9374225	574	4.651	0.000835	5.572	0.000149	0.00420871	0.00159778	up	up		Promoter	ENSDART00000133012	YLP motif containing 1 [Source:ZFIN;Acc:ZDB-GENE-030131-2196]	ENSDARG00000043680
20_9474528_9475222	695	4.245	0.001836	5.987	6.7e-05	0.00753688	0.00090835	up	up		Promoter	ENSDART00000120818
21_10543226_10543818	593	5.057	0.00038	6.403	3e-05	0.00257138	0.000560422	up	up		Promoter	ENSDART00000131538	CUGBP, Elav-like family member 4 [Source:ZFIN;Acc:ZDB-GENE-040718-300]	ENSDARG00000070045
21_1082543_1085303	2761	4.245	0.001836	5.987	6.7e-05	0.00753688	0.00090835	up	up		Promoter	ENSDART00000115614
21_26312740_26313874	1135	6.274	3.6e-05	9.312	0	0.000516781	0	up	up		Promoter	ENSDART00000100685	leucine rich repeat and fibronectin type III domain containing 4 [Source:HGNC Symbol;Acc:28456]	ENSDARG00000055132
21_2752357_2753360	1004	6.274	3.6e-05	8.065	1e-06	0.000516781	5.13631e-05	up	up		Promoter	ENSDART00000119497
21_27833803_27834477	675	5.057	0.00038	5.572	0.000149	0.00257138	0.00159778	up	up		Promoter	ENSDART00000132844	RAS guanyl releasing protein 2 (calcium and DAG-regulated) [Source:ZFIN;Acc:ZDB-GENE-091118-124]	ENSDARG00000062328
21_28120817_28121392	576	7.896	2e-06	6.403	3e-05	6.10614e-05	0.000560422	up	up		Promoter	ENSDART00000097307	purine-rich element binding protein A [Source:ZFIN;Acc:ZDB-GENE-040624-8]	ENSDARG00000067591
21_30601666_30602518	853	8.708	0	8.896	0	0	0	up	up		Promoter	ENSDART00000135591	teneurin transmembrane protein 2 [Source:HGNC Symbol;Acc:29943]	ENSDARG00000011171
21_3200726_3201199	474	4.245	0.001836	6.403	3e-05	0.00753688	0.000560422	up	up		Promoter	ENSDART00000098408	heterogeneous nuclear ribonucleoprotein A/B [Source:HGNC Symbol;Acc:5034]	ENSDARG00000017568
21_38032158_38032903	746	6.274	3.6e-05	5.987	6.7e-05	0.000516781	0.00090835	up	up		Promoter	ENSDART00000113607	carboxypeptidase D, b [Source:ZFIN;Acc:ZDB-GENE-060929-1270]	ENSDARG00000053877
21_38157269_38158716	1448	5.057	0.00038	6.403	3e-05	0.00257138	0.000560422	up	up		Promoter	ENSDART00000124227	Uncharacterized protein [Source:UniProtKB/TrEMBL;Acc:F1QQD7]	ENSDARG00000091178
21_38939278_38940163	886	5.868	7.9e-05	5.987	6.7e-05	0.000847656	0.00090835	up	up		Promoter	ENSDART00000100166	serine (or cysteine) peptidase inhibitor, clade F, member 1 [Source:ZFIN;Acc:ZDB-GENE-040912-2]	ENSDARG00000069048
21_42503724_42505358	1635	11.953	0	10.143	0	0	0	up	up		Promoter	ENSDART00000039571	calcium/calmodulin-dependent protein kinase (CaM kinase) II alpha [Source:ZFIN;Acc:ZDB-GENE-051113-72]	ENSDARG00000053617
21_44320993_44323624	2632	4.651	0.000835	11.39	0	0.00420871	0	up	up		Promoter	ENSDART00000126750	SAR1 homolog B (S. cerevisiae) [Source:ZFIN;Acc:ZDB-GENE-040426-1958]	ENSDARG00000068600
21_4768515_4769382	868	5.462	0.000173	6.403	3e-05	0.00149083	0.000560422	up	up		Promoter	ENSDART00000102669	Uncharacterized protein [Source:UniProtKB/TrEMBL;Acc:E9QB51]	ENSDARG00000070134
21_548810_550638	1829	4.651	0.000835	5.156	0.000333	0.00420871	0.00285629	up	up	Y	Promoter	ENSDART00000121214
21_5508262_5508632	371	5.462	0.000173	5.987	6.7e-05	0.00149083	0.00090835	up	up		Promoter	ENSDART00000141981	lipoxygenase homology domains 1a [Source:ZFIN;Acc:ZDB-GENE-091112-20]	ENSDARG00000094738
21_5787619_5788254	636	5.057	0.00038	8.896	0	0.00257138	0	up	up		Promoter	ENSDART00000151494	TATA box binding protein (TBP)-associated factor, RNA polymerase I, C, 110kDa [Source:HGNC Symbol;Acc:11534]	ENSDARG00000096310
21_6510369_6511894	1526	5.462	0.000173	5.156	0.000333	0.00149083	0.00285629	up	up		Promoter	ENSDART00000027425	procollagen, type V, alpha 1 [Source:ZFIN;Acc:ZDB-GENE-041105-6]	ENSDARG00000012593
21_6909242_6910255	1014	4.651	0.000835	8.896	0	0.00420871	0	up	up		Promoter	ENSDART00000145037
22_11233895_11235465	1571	9.113	0	6.818	1.4e-05	0	0.000337922	up	up		Promoter	ENSDART00000149634	ATPase, H+ transporting, lysosomal accessory protein 2 [Source:ZFIN;Acc:ZDB-GENE-040426-1960]	ENSDARG00000008735
22_11901582_11902311	730	4.245	0.001836	4.325	0.001651	0.00753688	0.00813572	up	up		Promoter	ENSDART00000121808	protein tyrosine phosphatase, non-receptor type 4, b [Source:ZFIN;Acc:ZDB-GENE-030131-6259]	ENSDARG00000000183
22_17656272_17657142	871	4.245	0.001836	4.325	0.001651	0.00753688	0.00813572	up	up		Promoter	ENSDART00000139523	RAB GTPase activating protein 1-like [Source:HGNC Symbol;Acc:24663]	ENSDARG00000061757
22_2101081_2101728	648	5.868	7.9e-05	4.74	0.000741	0.000847656	0.0047841	up	up		Promoter	ENSDART00000140578	si:dkey-20i20.2 [Source:ZFIN;Acc:ZDB-GENE-060503-528]	ENSDARG00000071719
22_25232898_25233920	1023	5.868	7.9e-05	5.572	0.000149	0.000847656	0.00159778	up	up		Promoter	ENSDART00000078225	vitellogenin 5 [Source:ZFIN;Acc:ZDB-GENE-001201-4]	ENSDARG00000092126
22_2604551_2605016	466	5.057	0.00038	5.987	6.7e-05	0.00257138	0.00090835	up	up		Promoter	ENSDART00000106631	si:dkeyp-53d3.3 [Source:ZFIN;Acc:ZDB-GENE-050208-644]	ENSDARG00000071862
22_26289377_26290564	1188	9.925	0	5.987	6.7e-05	0	0.00090835	up	up		Promoter	ENSDART00000113381	Uncharacterized protein [Source:UniProtKB/TrEMBL;Acc:E9QCA5]	ENSDARG00000089516
22_2808550_2809575	1026	6.274	3.6e-05	6.818	1.4e-05	0.000516781	0.000337922	up	up		Promoter	ENSDART00000142165	si:dkey-1b17.2 [Source:ZFIN;Acc:ZDB-GENE-050208-769]	ENSDARG00000092128
22_40723451_40725056	1606	5.057	0.00038	6.403	3e-05	0.00257138	0.000560422	up	up		Promoter	ENSDART00000143190	ArfGAP with coiled-coil, ankyrin repeat and PH domains 2 [Source:ZFIN;Acc:ZDB-GENE-050208-640]	ENSDARG00000060783
22_41865636_41866172	537	4.245	0.001836	5.572	0.000149	0.00753688	0.00159778	up	up		Promoter	ENSDART00000104437	si:ch211-262h13.5 [Source:ZFIN;Acc:ZDB-GENE-050208-372]	ENSDARG00000070892
22_6819181_6819564	384	5.462	0.000173	5.572	0.000149	0.00149083	0.00159778	up	up		Promoter	ENSDART00000124219	Uncharacterized protein [Source:UniProtKB/TrEMBL;Acc:E7F7Q7]	ENSDARG00000090869
22_8383884_8385083	1200	5.868	7.9e-05	4.325	0.001651	0.000847656	0.00813572	up	up		Promoter	ENSDART00000119985
23_10507785_10509146	1362	4.245	0.001836	4.325	0.001651	0.00753688	0.00813572	up	up		Promoter	ENSDART00000087899	eukaryotic translation initiation factor 4Ba [Source:ZFIN;Acc:ZDB-GENE-060629-1]	ENSDARG00000017439
23_15128299_15129146	848	5.057	0.00038	8.481	1e-06	0.00257138	5.13631e-05	up	up		Promoter	ENSDART00000135976
23_22153669_22154537	869	5.868	7.9e-05	8.065	1e-06	0.000847656	5.13631e-05	up	up		Promoter	ENSDART00000120215
23_22884296_22884759	464	5.868	7.9e-05	6.403	3e-05	0.000847656	0.000560422	up	up		Promoter	ENSDART00000116058
23_23164108_23165705	1598	4.651	0.000835	5.156	0.000333	0.00420871	0.00285629	up	up		Promoter	ENSDART00000135130	arginine-glutamic acid dipeptide (RE) repeats a [Source:ZFIN;Acc:ZDB-GENE-060718-1]	ENSDARG00000077353
23_28934911_28935655	745	5.057	0.00038	6.818	1.4e-05	0.00257138	0.000337922	up	up		Promoter	ENSDART00000078148	structural maintenance of chromosomes 1A [Source:ZFIN;Acc:ZDB-GENE-090506-9]	ENSDARG00000055754
23_31218595_31219376	782	7.491	3e-06	8.481	1e-06	8.33073e-05	5.13631e-05	up	up		Promoter	ENSDART00000115417	si:ch211-197l9.2 [Source:ZFIN;Acc:ZDB-GENE-091204-369]	ENSDARG00000078244
23_33509114_33509781	668	4.245	0.001836	5.156	0.000333	0.00753688	0.00285629	up	up		Promoter	ENSDART00000030368	si:ch211-226m16.3 [Source:ZFIN;Acc:ZDB-GENE-040724-8]	ENSDARG00000026864
23_35598642_35599165	524	6.274	3.6e-05	6.818	1.4e-05	0.000516781	0.000337922	up	up		Promoter	ENSDART00000147915	family with sequence similarity 150, member Ba [Source:ZFIN;Acc:ZDB-GENE-100922-116]	ENSDARG00000091073
23_36328130_36328688	559	5.462	0.000173	6.403	3e-05	0.00149083	0.000560422	up	up		Promoter	ENSDART00000153206
23_37634670_37635187	518	4.245	0.001836	6.818	1.4e-05	0.00753688	0.000337922	up	up		Promoter	ENSDART00000078253	torsin family 1 like 1 [Source:ZFIN;Acc:ZDB-GENE-080723-36]	ENSDARG00000055856
23_38220454_38221290	837	8.708	0	5.156	0.000333	0	0.00285629	up	up		Promoter	ENSDART00000116079
23_4339002_4339534	533	5.057	0.00038	5.156	0.000333	0.00257138	0.00285629	up	up		Promoter	ENSDART00000138408		ENSDARG00000094801
23_4339752_4340411	660	4.245	0.001836	5.987	6.7e-05	0.00753688	0.00090835	up	up		Promoter	ENSDART00000138408		ENSDARG00000094801
23_43795052_43795973	922	6.274	3.6e-05	4.74	0.000741	0.000516781	0.0047841	up	up		Promoter	ENSDART00000055564	regulation of nuclear pre-mRNA domain containing 1B [Source:ZFIN;Acc:ZDB-GENE-030131-355]	ENSDARG00000038113
23_44646708_44647605	898	4.651	0.000835	5.156	0.000333	0.00420871	0.00285629	up	up		Promoter	ENSDART00000123542	Uncharacterized protein [Source:UniProtKB/TrEMBL;Acc:E7EXN8]	ENSDARG00000086846
23_45495429_45497200	1772	4.651	0.000835	5.156	0.000333	0.00420871	0.00285629	up	up		Promoter	ENSDART00000076367
23_4836218_4837105	888	5.057	0.00038	8.481	1e-06	0.00257138	5.13631e-05	up	up		Promoter	ENSDART00000135933	vestigial like 4a (Drosophila) [Source:ZFIN;Acc:ZDB-GENE-100922-230]	ENSDARG00000094332
23_5023642_5024593	952	5.462	0.000173	6.403	3e-05	0.00149083	0.000560422	up	up		Promoter	ENSDART00000147122	neurotrophin 7 [Source:ZFIN;Acc:ZDB-GENE-990415-176]	ENSDARG00000058961
23_6405714_6406353	640	4.651	0.000835	5.572	0.000149	0.00420871	0.00159778	up	up		Promoter	ENSDART00000112667	protein phosphatase 1, regulatory subunit 12B [Source:HGNC Symbol;Acc:7619]	ENSDARG00000075779
24_22281340_22281982	643	4.651	0.000835	5.572	0.000149	0.00420871	0.00159778	up	up		Promoter	ENSDART00000066677	si:ch211-140b10.6 [Source:ZFIN;Acc:ZDB-GENE-091204-382]	ENSDARG00000045342
24_32108563_32109547	985	4.245	0.001836	4.325	0.001651	0.00753688	0.00813572	up	up		Promoter	ENSDART00000116626
24_39209477_39210012	536	5.462	0.000173	5.156	0.000333	0.00149083	0.00285629	up	up		Promoter	ENSDART00000066558	2,4-dienoyl CoA reductase 2, peroxisomal [Source:ZFIN;Acc:ZDB-GENE-040426-2612]	ENSDARG00000045257
24_4175219_4176152	934	4.245	0.001836	5.572	0.000149	0.00753688	0.00159778	up	up		Promoter	ENSDART00000115759
24_5998383_5999944	1562	8.302	1e-06	4.325	0.001651	3.60083e-05	0.00813572	up	up		Promoter	ENSDART00000119567
25_14422743_14423706	964	4.651	0.000835	6.403	3e-05	0.00420871	0.000560422	up	up		Promoter	ENSDART00000145387	SH3 and multiple ankyrin repeat domains 2 [Source:ZFIN;Acc:ZDB-GENE-061207-58]	ENSDARG00000062325
25_22337133_22337647	515	4.651	0.000835	5.572	0.000149	0.00420871	0.00159778	up	up		Promoter	ENSDART00000087817	dedicator of cytokinesis 4 [Source:HGNC Symbol;Acc:19192]	ENSDARG00000076213
25_24860098_24860729	632	5.462	0.000173	6.818	1.4e-05	0.00149083	0.000337922	up	up		Promoter	ENSDART00000067200	si:dkeyp-19e1.3 [Source:ZFIN;Acc:ZDB-GENE-081104-56]	ENSDARG00000051836
25_28483637_28485225	1589	4.245	0.001836	5.156	0.000333	0.00753688	0.00285629	up	up		Promoter	ENSDART00000119222
25_38441526_38442080	555	4.245	0.001836	4.74	0.000741	0.00753688	0.0047841	up	up		Promoter	ENSDART00000081636	chromatin modifying protein 1A [Source:ZFIN;Acc:ZDB-GENE-040426-1474]	ENSDARG00000009802
25_4854080_4855098	1019	5.057	0.00038	7.65	3e-06	0.00257138	0.000119495	up	up		Promoter	ENSDART00000136010
25_8180113_8180934	822	5.462	0.000173	8.065	1e-06	0.00149083	5.13631e-05	up	up		Promoter	ENSDART00000104686	autophagy/beclin-1 regulator 1 [Source:HGNC Symbol;Acc:25990]	ENSDARG00000039878
3_15922071_15923568	1498	10.33	0	4.325	0.001651	0	0.00813572	up	up	Y	Promoter	ENSDART00000109014	gap junction protein, gamma 1, 45kDa [Source:HGNC Symbol;Acc:4280]	ENSDARG00000077563
3_16075555_16076516	962	4.245	0.001836	6.403	3e-05	0.00753688	0.000560422	up	up	Y	Promoter	ENSDART00000090767	potassium inwardly-rectifying channel, subfamily J, member 12 [Source:HGNC Symbol;Acc:6258]	ENSDARG00000062618
3_16380379_16381318	940	6.274	3.6e-05	5.572	0.000149	0.000516781	0.00159778	up	up		Promoter	ENSDART00000132732	transmembrane protein 86B [Source:ZFIN;Acc:ZDB-GENE-060825-132]	ENSDARG00000038296
3_17606048_17607107	1060	5.868	7.9e-05	5.156	0.000333	0.000847656	0.00285629	up	up		Promoter	ENSDART00000143182
3_19065167_19067205	2039	4.245	0.001836	6.403	3e-05	0.00753688	0.000560422	up	up		Promoter	ENSDART00000134514	SWI/SNF related, matrix associated, actin dependent regulator of chromatin, subfamily a, member 4 [Source:ZFIN;Acc:ZDB-GENE-030605-1]	ENSDARG00000077226
3_24057910_24058993	1084	5.462	0.000173	4.74	0.000741	0.00149083	0.0047841	up	up		Promoter	ENSDART00000110682	homeo box B1a [Source:ZFIN;Acc:ZDB-GENE-990415-101]	ENSDARG00000008174
3_26110208_26111035	828	5.868	7.9e-05	5.156	0.000333	0.000847656	0.00285629	up	up		Promoter	ENSDART00000103690	C-type lectin domain family 16, member A [Source:ZFIN;Acc:ZDB-GENE-040426-951]	ENSDARG00000038094
3_26208572_26209087	516	5.462	0.000173	4.74	0.000741	0.00149083	0.0047841	up	up		Promoter	ENSDART00000143710	phosphatidylinositol glycan, class Q [Source:ZFIN;Acc:ZDB-GENE-030131-9793]	ENSDARG00000038097
3_28850162_28851218	1057	4.245	0.001836	5.987	6.7e-05	0.00753688	0.00090835	up	up	Y	Promoter	ENSDART00000151347	si:dkey-20j1.4 [Source:ZFIN;Acc:ZDB-GENE-120214-35]	ENSDARG00000096338
3_32070283_32071222	940	5.462	0.000173	8.065	1e-06	0.00149083	5.13631e-05	up	up		Promoter	ENSDART00000146509	lin-7 homolog B (C. elegans) [Source:ZFIN;Acc:ZDB-GENE-041011-1]	ENSDARG00000037932
3_32826512_32827222	711	4.245	0.001836	5.572	0.000149	0.00753688	0.00159778	up	up		Promoter	ENSDART00000029262	Uncharacterized protein [Source:UniProtKB/TrEMBL;Acc:E7FGN9]	ENSDARG00000027196
3_3604784_3606523	1740	7.085	7e-06	8.065	1e-06	0.000161553	5.13631e-05	up	up	Y	Promoter	ENSDART00000088592	Uncharacterized protein [Source:UniProtKB/TrEMBL;Acc:F1QMP0]	ENSDARG00000061805
3_36584036_36584444	409	4.651	0.000835	4.325	0.001651	0.00420871	0.00813572	up	up		Promoter	ENSDART00000151300	si:dkeyp-72e1.6 [Source:ZFIN;Acc:ZDB-GENE-120215-228]	ENSDARG00000091838
3_36927045_36927382	338	5.462	0.000173	7.234	6e-06	0.00149083	0.000186844	up	up		Promoter	ENSDART00000111981	contactin associated protein 1 [Source:HGNC Symbol;Acc:8011]	ENSDARG00000074524
3_37822020_37822690	671	5.462	0.000173	5.572	0.000149	0.00149083	0.00159778	up	up		Promoter	ENSDART00000039517	acid-sensing (proton-gated) ion channel 2 [Source:ZFIN;Acc:ZDB-GENE-040513-4]	ENSDARG00000006849
3_40654885_40655320	436	4.651	0.000835	4.325	0.001651	0.00420871	0.00813572	up	up		Promoter	ENSDART00000130058	ring finger protein 216 [Source:ZFIN;Acc:ZDB-GENE-081104-199]	ENSDARG00000087893
3_53828163_53828917	755	5.868	7.9e-05	4.74	0.000741	0.000847656	0.0047841	up	up		Promoter	ENSDART00000114343	bromodomain containing 4 [Source:ZFIN;Acc:ZDB-GENE-030131-267]	ENSDARG00000078904
3_58605148_58605788	641	4.245	0.001836	4.74	0.000741	0.00753688	0.0047841	up	up		Promoter	ENSDART00000101839	transmembrane channel-like 6a [Source:ZFIN;Acc:ZDB-GENE-081114-3]	ENSDARG00000069787
3_6598421_6599157	737	4.245	0.001836	7.65	3e-06	0.00753688	0.000119495	up	up		Promoter	ENSDART00000124570	Uncharacterized protein [Source:UniProtKB/TrEMBL;Acc:E7F9G5]	ENSDARG00000086543
3_7567318_7568489	1172	5.462	0.000173	5.987	6.7e-05	0.00149083	0.00090835	up	up		Promoter	ENSDART00000129133	Uncharacterized protein [Source:UniProtKB/TrEMBL;Acc:E7FBH2]	ENSDARG00000087816
3_8270089_8270519	431	4.245	0.001836	5.572	0.000149	0.00753688	0.00159778	up	up		Promoter	ENSDART00000129399	chromosome 19 open reading frame 43 [Source:HGNC Symbol;Acc:28424]	ENSDARG00000087146
4_12795354_12796053	700	4.245	0.001836	5.156	0.000333	0.00753688	0.00285629	up	up		Promoter	ENSDART00000133157	contactin 1b [Source:ZFIN;Acc:ZDB-GENE-041210-236]	ENSDARG00000045685
4_18676184_18676963	780	5.868	7.9e-05	5.987	6.7e-05	0.000847656	0.00090835	up	up		Promoter	ENSDART00000066964	hepatocyte growth factor a [Source:ZFIN;Acc:ZDB-GENE-041014-2]	ENSDARG00000045544
4_20653401_20654086	686	4.245	0.001836	5.572	0.000149	0.00753688	0.00159778	up	up		Promoter	ENSDART00000040266	myogenic factor 6 [Source:ZFIN;Acc:ZDB-GENE-040309-2]	ENSDARG00000029830
4_25036337_25036800	464	6.274	3.6e-05	4.74	0.000741	0.000516781	0.0047841	up	up		Promoter	ENSDART00000125767	methionyl aminopeptidase 2a [Source:ZFIN;Acc:ZDB-GENE-061013-5]	ENSDARG00000069261
4_30228050_30229314	1265	5.462	0.000173	4.74	0.000741	0.00149083	0.0047841	up	up		Promoter	ENSDART00000150639
4_34817968_34819278	1311	4.651	0.000835	5.987	6.7e-05	0.00420871	0.00090835	up	up		Promoter	ENSDART00000151880
4_37942359_37945586	3228	2.634	4.2e-05	2.267	0.001001	0.000599961	0.00589912	up	up	Y	Promoter	ENSDART00000122866
4_42534_43365	832	8.302	1e-06	4.74	0.000741	3.60083e-05	0.0047841	up	up	Y	Promoter	ENSDART00000067488	mitochondrial ribosomal protein S10 [Source:ZFIN;Acc:ZDB-GENE-040914-39]	ENSDARG00000045913
4_42699759_42700569	811	5.868	7.9e-05	7.234	6e-06	0.000847656	0.000186844	up	up		Promoter	ENSDART00000133024
4_47064185_47065209	1025	12.764	0	8.065	1e-06	0	5.13631e-05	up	up		Promoter	ENSDART00000118540
4_48158276_48158935	660	5.057	0.00038	7.65	3e-06	0.00257138	0.000119495	up	up		Promoter	ENSDART00000150648	si:dkey-9i5.2 [Source:ZFIN;Acc:ZDB-GENE-110914-61]	ENSDARG00000095978
4_55644242_55644988	747	4.245	0.001836	10.143	0	0.00753688	0	up	up		Promoter	ENSDART00000140733
4_6753206_6753601	396	4.245	0.001836	4.74	0.000741	0.00753688	0.0047841	up	up		Promoter	ENSDART00000120292
4_7273552_7274206	655	7.085	7e-06	6.818	1.4e-05	0.000161553	0.000337922	up	up		Promoter	ENSDART00000133434	WNK lysine deficient protein kinase 1b [Source:ZFIN;Acc:ZDB-GENE-030131-2656]	ENSDARG00000039392
4_8498650_8499540	891	5.462	0.000173	6.403	3e-05	0.00149083	0.000560422	up	up		Promoter	ENSDART00000120850
4_8655782_8656630	849	4.245	0.001836	4.325	0.001651	0.00753688	0.00813572	up	up		Promoter	ENSDART00000114060	cerebral dopamine neurotrophic factor [Source:ZFIN;Acc:ZDB-GENE-070410-37]	ENSDARG00000075501
4_9771096_9772129	1034	5.462	0.000173	6.403	3e-05	0.00149083	0.000560422	up	up		Promoter	ENSDART00000102543	wingless-type MMTV integration site family, member 16 [Source:ZFIN;Acc:ZDB-GENE-040426-2330]	ENSDARG00000094973
5_17263140_17264227	1088	7.491	3e-06	5.987	6.7e-05	8.33073e-05	0.00090835	up	up		Promoter	ENSDART00000111646	suppressor of defective silencing 3 homolog (SDS3, S. cerevisiae) [Source:ZFIN;Acc:ZDB-GENE-040801-236]	ENSDARG00000073737
5_2523161_2524226	1066	9.925	0	13.468	0	0	0	up	up	Y	Promoter	ENSDART00000010079	heat shock protein 5 [Source:ZFIN;Acc:ZDB-GENE-031001-11]	ENSDARG00000004665
5_25751622_25752731	1110	9.925	0	15.13	0	0	0	up	up		Promoter	ENSDART00000135934	tumor protein p53 [Source:ZFIN;Acc:ZDB-GENE-990415-270]	ENSDARG00000035559
5_26206275_26207043	769	7.085	7e-06	10.143	0	0.000161553	0	up	up		Promoter	ENSDART00000142798
5_27611935_27613239	1305	8.302	1e-06	6.818	1.4e-05	3.60083e-05	0.000337922	up	up		Promoter	ENSDART00000142210
5_27615876_27616418	543	9.925	0	5.572	0.000149	0	0.00159778	up	up		Promoter	ENSDART00000117882
5_33108691_33109661	971	4.651	0.000835	4.325	0.001651	0.00420871	0.00813572	up	up		Promoter	ENSDART00000002866	purinergic receptor P2X, ligand-gated ion channel, 1 [Source:ZFIN;Acc:ZDB-GENE-030319-1]	ENSDARG00000016695
5_455777_456529	753	5.462	0.000173	5.156	0.000333	0.00149083	0.00285629	up	up		Promoter	ENSDART00000082162	Uncharacterized protein [Source:UniProtKB/TrEMBL;Acc:E7FDI0]	ENSDARG00000059134
5_54307938_54308591	654	4.245	0.001836	5.156	0.000333	0.00753688	0.00285629	up	up		Promoter	ENSDART00000143704	Uncharacterized protein [Source:UniProtKB/TrEMBL;Acc:E9QJK7]	ENSDARG00000095574
5_63248376_63249211	836	5.057	0.00038	7.65	3e-06	0.00257138	0.000119495	up	up		Promoter	ENSDART00000002730	G protein-coupled receptor kinase 1 b [Source:ZFIN;Acc:ZDB-GENE-050417-211]	ENSDARG00000011184
5_64537161_64537655	495	5.868	7.9e-05	4.325	0.001651	0.000847656	0.00813572	up	up		Promoter	ENSDART00000127521
5_69533684_69534763	1080	5.868	7.9e-05	8.896	0	0.000847656	0	up	up		Promoter	ENSDART00000118832
5_72813060_72813467	408	5.868	7.9e-05	5.987	6.7e-05	0.000847656	0.00090835	up	up		Promoter	ENSDART00000149419	SET domain containing (lysine methyltransferase) 8b [Source:ZFIN;Acc:ZDB-GENE-071004-17]	ENSDARG00000076551
5_8104612_8105369	758	5.057	0.00038	7.234	6e-06	0.00257138	0.000186844	up	up		Promoter	ENSDART00000128736	LMBR1 domain containing 2a [Source:ZFIN;Acc:ZDB-GENE-050417-32]	ENSDARG00000034710
6_10721920_10722689	770	5.462	0.000173	6.403	3e-05	0.00149083	0.000560422	up	up		Promoter	ENSDART00000151661	WAS/WASL interacting protein family, member 1 [Source:ZFIN;Acc:ZDB-GENE-110815-1]	ENSDARG00000071084
6_11710707_11711694	988	10.736	0	10.559	0	0	0	up	up		Promoter	ENSDART00000126243	membrane-associated ring finger (C3HC4) 7 [Source:ZFIN;Acc:ZDB-GENE-080204-121]	ENSDARG00000057772
6_12738440_12739457	1018	7.491	3e-06	9.312	0	8.33073e-05	0	up	up		Promoter	ENSDART00000148145
6_14986382_14988002	1621	6.679	1.6e-05	8.896	0	0.000301041	0	up	up		Promoter	ENSDART00000138078
6_19947377_19949040	1664	5.462	0.000173	8.065	1e-06	0.00149083	5.13631e-05	up	up		Promoter	ENSDART00000021813	glutamate-ammonia ligase (glutamine synthase) b [Source:ZFIN;Acc:ZDB-GENE-030131-8417]	ENSDARG00000017339
6_20076365_20077682	1318	5.057	0.00038	9.728	0	0.00257138	0	up	up		Promoter	ENSDART00000150895	SEC16 homolog B (S. cerevisiae) [Source:HGNC Symbol;Acc:30301]	ENSDARG00000052046
6_21610939_21611314	376	5.057	0.00038	7.65	3e-06	0.00257138	0.000119495	up	up		Promoter	ENSDART00000124948	signal recognition particle 68 [Source:ZFIN;Acc:ZDB-GENE-040831-3]	ENSDARG00000020820
6_23686700_23687464	765	7.085	7e-06	8.896	0	0.000161553	0	up	up		Promoter	ENSDART00000145800
6_26983508_26984271	764	5.868	7.9e-05	7.234	6e-06	0.000847656	0.000186844	up	up		Promoter	ENSDART00000114347	selenocysteine lyase [Source:ZFIN;Acc:ZDB-GENE-080204-30]	ENSDARG00000073813
6_34386039_34386808	770	7.491	3e-06	8.065	1e-06	8.33073e-05	5.13631e-05	up	up		Promoter	ENSDART00000102483	regulator of G-protein signalling 4 [Source:ZFIN;Acc:ZDB-GENE-030131-9839]	ENSDARG00000070047
6_37660809_37661446	638	12.764	0	11.806	0	0	0	up	up		Promoter	ENSDART00000147898
6_39207171_39207989	819	8.302	1e-06	9.312	0	3.60083e-05	0	up	up		Promoter	ENSDART00000148531	Rho guanine nucleotide exchange factor (GEF) 25b [Source:ZFIN;Acc:ZDB-GENE-080225-17]	ENSDARG00000014465
6_40452101_40452993	893	4.245	0.001836	10.974	0	0.00753688	0	up	up		Promoter	ENSDART00000033819	protein kinase C, delta a [Source:ZFIN;Acc:ZDB-GENE-030131-6503]	ENSDARG00000009208
6_42309558_42310646	1089	7.491	3e-06	9.728	0	8.33073e-05	0	up	up		Promoter	ENSDART00000129302	ER membrane protein complex subunit 3 [Source:ZFIN;Acc:ZDB-GENE-040426-2904]	ENSDARG00000020607
6_42406760_42407881	1122	7.085	7e-06	5.156	0.000333	0.000161553	0.00285629	up	up		Promoter	ENSDART00000150226	macrophage stimulating 1 receptor (c-met-related tyrosine kinase), a [Source:ZFIN;Acc:ZDB-GENE-071218-2]	ENSDARG00000060235
6_42515597_42516617	1021	6.679	1.6e-05	8.481	1e-06	0.000301041	5.13631e-05	up	up		Promoter	ENSDART00000036301	CaM kinase-like vesicle-associated [Source:HGNC Symbol;Acc:28788]	ENSDARG00000027963
6_46605290_46607062	1773	8.708	0	10.974	0	0	0	up	up		Promoter	ENSDART00000064853	oxytocin receptor like [Source:ZFIN;Acc:ZDB-GENE-110805-1]	ENSDARG00000044175
6_49115211_49116014	804	4.651	0.000835	6.818	1.4e-05	0.00420871	0.000337922	up	up		Promoter	ENSDART00000132867	nerve growth factor (beta polypeptide) [Source:ZFIN;Acc:ZDB-GENE-000629-2]	ENSDARG00000014050
6_53919340_53920277	938	7.896	2e-06	7.65	3e-06	6.10614e-05	0.000119495	up	up		Promoter	ENSDART00000083880	hyaluronoglucosaminidase 2 [Source:HGNC Symbol;Acc:5321]	ENSDARG00000059931
6_56826854_56828317	1464	6.679	1.6e-05	8.065	1e-06	0.000301041	5.13631e-05	up	up		Promoter	ENSDART00000110855	Uncharacterized protein [Source:UniProtKB/TrEMBL;Acc:E7F061]	ENSDARG00000075268
6_57426893_57428034	1142	5.868	7.9e-05	9.312	0	0.000847656	0	up	up		Promoter	ENSDART00000128065	DEAD (Asp-Glu-Ala-Asp) box polypeptide 27 [Source:ZFIN;Acc:ZDB-GENE-031001-8]	ENSDARG00000091831
6_59480616_59481646	1031	10.33	0	13.884	0	0	0	up	up		Promoter	ENSDART00000129188	Uncharacterized protein [Source:UniProtKB/TrEMBL;Acc:E7F692]	ENSDARG00000089451
6_6340163_6341070	908	8.708	0	9.312	0	0	0	up	up		Promoter	ENSDART00000092257	phospholipase D family, member 5 [Source:HGNC Symbol;Acc:26879]	ENSDARG00000063257
6_6767509_6768188	680	4.651	0.000835	7.234	6e-06	0.00420871	0.000186844	up	up	Y	Promoter	ENSDART00000111024	Rap guanine nucleotide exchange factor (GEF) 4 [Source:HGNC Symbol;Acc:16626]	ENSDARG00000075924
6_7167545_7168573	1029	6.274	3.6e-05	7.234	6e-06	0.000516781	0.000186844	up	up		Promoter	ENSDART00000125912	DAZ interacting zinc finger protein 1 [Source:ZFIN;Acc:ZDB-GENE-040526-1]	ENSDARG00000000943
7_16039353_16040516	1164	5.462	0.000173	9.312	0	0.00149083	0	up	up		Promoter	ENSDART00000124676	synaptic vesicle glycoprotein 2 ba [Source:ZFIN;Acc:ZDB-GENE-070209-134]	ENSDARG00000057427
7_19929102_19929839	738	5.462	0.000173	7.65	3e-06	0.00149083	0.000119495	up	up		Promoter	ENSDART00000122564	tRNA methyltransferase 10 homolog A (S. cerevisiae) [Source:HGNC Symbol;Acc:28403]	ENSDARG00000036678
7_25277417_25278362	946	5.057	0.00038	5.572	0.000149	0.00257138	0.00159778	up	up	Y	Promoter	ENSDART00000111923	ajuba LIM protein [Source:ZFIN;Acc:ZDB-GENE-030131-9341]	ENSDARG00000077842
7_25641279_25641706	428	4.651	0.000835	5.572	0.000149	0.00420871	0.00159778	up	up		Promoter	ENSDART00000121684	N-acetyltransferase 8-like [Source:ZFIN;Acc:ZDB-GENE-030729-4]	ENSDARG00000077256
7_29904044_29904927	884	8.708	0	6.818	1.4e-05	0	0.000337922	up	up		Promoter	ENSDART00000028887	TMEM9 domain family, member B [Source:ZFIN;Acc:ZDB-GENE-030131-4656]	ENSDARG00000025693
7_36770249_36770855	607	5.462	0.000173	6.403	3e-05	0.00149083	0.000560422	up	up		Promoter	ENSDART00000005053	solute carrier family 12 (potassium/chloride transporters), member 4 [Source:ZFIN;Acc:ZDB-GENE-090218-27]	ENSDARG00000014378
7_56124933_56125542	610	6.274	3.6e-05	5.987	6.7e-05	0.000516781	0.00090835	up	up		Promoter	ENSDART00000044592	si:dkey-173l11.3 [Source:ZFIN;Acc:ZDB-GENE-081104-9]	ENSDARG00000092450
7_56911194_56911861	668	7.491	3e-06	6.403	3e-05	8.33073e-05	0.000560422	up	up		Promoter	ENSDART00000125275	poly(A) binding protein, nuclear 1, like [Source:ZFIN;Acc:ZDB-GENE-080709-5]	ENSDARG00000087996
7_59991961_59992783	823	6.679	1.6e-05	6.403	3e-05	0.000301041	0.000560422	up	up		Promoter	ENSDART00000119020
7_60168656_60169393	738	9.519	0	8.896	0	0	0	up	up		Promoter	ENSDART00000120808
7_69544536_69545749	1214	4.651	0.000835	4.74	0.000741	0.00420871	0.0047841	up	up		Promoter	ENSDART00000091052	copine VII [Source:HGNC Symbol;Acc:2320]	ENSDARG00000037084
7_75367597_75368525	929	5.057	0.00038	8.481	1e-06	0.00257138	5.13631e-05	up	up		Promoter	ENSDART00000126193
7_9217069_9218143	1075	4.651	0.000835	5.572	0.000149	0.00420871	0.00159778	up	up		Promoter	ENSDART00000112492	zgc:194686 [Source:ZFIN;Acc:ZDB-GENE-080721-26]	ENSDARG00000076388
8_21102700_21103525	826	5.057	0.00038	5.572	0.000149	0.00257138	0.00159778	up	up		Promoter	ENSDART00000002838
8_24045409_24046709	1301	4.245	0.001836	5.987	6.7e-05	0.00753688	0.00090835	up	up		Promoter	ENSDART00000141090
8_28461528_28463518	1991	4.651	0.000835	4.74	0.000741	0.00420871	0.0047841	up	up		Promoter	ENSDART00000138153
8_35274154_35275585	1432	4.245	0.001836	7.234	6e-06	0.00753688	0.000186844	up	up	Y	Promoter	ENSDART00000138935	zgc:77614 [Source:ZFIN;Acc:ZDB-GENE-040426-1844]	ENSDARG00000093481
8_35277002_35278451	1450	7.896	2e-06	10.559	0	6.10614e-05	0	up	up		Promoter	ENSDART00000138935	zgc:77614 [Source:ZFIN;Acc:ZDB-GENE-040426-1844]	ENSDARG00000093481
8_35305450_35306359	910	5.057	0.00038	6.403	3e-05	0.00257138	0.000560422	up	up		Promoter	ENSDART00000133346	zgc:77614 [Source:ZFIN;Acc:ZDB-GENE-040426-1844]	ENSDARG00000092675
8_35393238_35394763	1526	9.113	0	8.481	1e-06	0	5.13631e-05	up	up	Y	Promoter	ENSDART00000134403	zgc:77614 [Source:ZFIN;Acc:ZDB-GENE-040426-1844]	ENSDARG00000092670
8_35744219_35745058	840	7.085	7e-06	8.481	1e-06	0.000161553	5.13631e-05	up	up		Promoter	ENSDART00000134823	Uncharacterized protein [Source:UniProtKB/TrEMBL;Acc:E9QBV6]	ENSDARG00000094167
8_374550_376610	2061	4.245	0.001836	8.065	1e-06	0.00753688	5.13631e-05	up	up		Promoter	ENSDART00000128727	Dmx-like 1 [Source:HGNC Symbol;Acc:2937]	ENSDARG00000088990
8_44665650_44666424	775	5.462	0.000173	5.156	0.000333	0.00149083	0.00285629	up	up		Promoter	ENSDART00000075550	Kazal-type serine peptidase inhibitor domain 3 [Source:ZFIN;Acc:ZDB-GENE-050208-155]	ENSDARG00000053509
8_47336714_47337472	759	4.651	0.000835	4.74	0.000741	0.00420871	0.0047841	up	up		Promoter	ENSDART00000143861	si:ch211-220m6.4 [Source:ZFIN;Acc:ZDB-GENE-081104-183]	ENSDARG00000092262
8_55396302_55397982	1681	5.057	0.00038	4.74	0.000741	0.00257138	0.0047841	up	up		Promoter	ENSDART00000111023	UDP-Gal:betaGlcNAc beta 1,3-galactosyltransferase, polypeptide 4 [Source:ZFIN;Acc:ZDB-GENE-081104-482]	ENSDARG00000076218
8_55944088_55944748	661	6.274	3.6e-05	5.156	0.000333	0.000516781	0.00285629	up	up		Promoter	ENSDART00000066457	leucine-rich repeats and transmembrane domains 1 [Source:HGNC Symbol;Acc:25023]	ENSDARG00000045205
9_14385940_14386901	962	4.245	0.001836	4.325	0.001651	0.00753688	0.00813572	up	up		Promoter	ENSDART00000135209	protein kinase, AMP-activated, gamma 3b non-catalytic subunit [Source:ZFIN;Acc:ZDB-GENE-060421-6938]	ENSDARG00000000369
9_15269461_15270129	669	5.868	7.9e-05	7.65	3e-06	0.000847656	0.000119495	up	up		Promoter	ENSDART00000137117	par-3 partitioning defective 3 homolog B (C. elegans) [Source:HGNC Symbol;Acc:14446]	ENSDARG00000034555
9_1739599_1740005	407	5.462	0.000173	5.156	0.000333	0.00149083	0.00285629	up	up		Promoter	ENSDART00000116977
9_19912859_19913883	1025	6.274	3.6e-05	10.143	0	0.000516781	0	up	up		Promoter	ENSDART00000134600
9_20796942_20798268	1327	4.245	0.001836	5.572	0.000149	0.00753688	0.00159778	up	up		Promoter	ENSDART00000146841	si:ch211-141e20.2 [Source:ZFIN;Acc:ZDB-GENE-070912-75]	ENSDARG00000093349
9_23170874_23171307	434	5.868	7.9e-05	5.987	6.7e-05	0.000847656	0.00090835	up	up		Promoter	ENSDART00000101902	crystallin, gamma M2d8 [Source:ZFIN;Acc:ZDB-GENE-040718-321]	ENSDARG00000069817
9_24580931_24581317	387	6.274	3.6e-05	4.74	0.000741	0.000516781	0.0047841	up	up		Promoter	ENSDART00000139982
9_24839763_24840674	912	6.679	1.6e-05	5.156	0.000333	0.000301041	0.00285629	up	up		Promoter	ENSDART00000041992	dehydrogenase/reductase (SDR family) member 12 [Source:ZFIN;Acc:ZDB-GENE-060929-1134]	ENSDARG00000011770
9_25306685_25309256	2572	5.057	0.00038	4.325	0.001651	0.00257138	0.00813572	up	up	Y	Promoter	ENSDART00000120705
9_27136233_27137022	790	5.057	0.00038	4.325	0.001651	0.00257138	0.00813572	up	up		Promoter	ENSDART00000026011	ephrin B2a [Source:ZFIN;Acc:ZDB-GENE-990415-67]	ENSDARG00000020164
9_34267909_34268596	688	4.651	0.000835	5.156	0.000333	0.00420871	0.00285629	up	up		Promoter	ENSDART00000138871	si:dkey-216e24.3 [Source:ZFIN;Acc:ZDB-GENE-070912-438]	ENSDARG00000055833
9_35286385_35289325	2941	4.245	0.001836	4.325	0.001651	0.00753688	0.00813572	up	up		Promoter	ENSDART00000059939	glycoprotein A33 (transmembrane) [Source:ZFIN;Acc:ZDB-GENE-070912-194]	ENSDARG00000040898
9_47599947_47600280	334	5.868	7.9e-05	4.74	0.000741	0.000847656	0.0047841	up	up		Promoter	ENSDART00000145931	lactase [Source:ZFIN;Acc:ZDB-GENE-081104-434]	ENSDARG00000092404
9_55842143_55843053	911	4.651	0.000835	7.234	6e-06	0.00420871	0.000186844	up	up		Promoter	ENSDART00000148764	endothelin receptor B1b [Source:ZFIN;Acc:ZDB-GENE-081105-182]	ENSDARG00000053498
9_7071543_7072068	526	4.245	0.001836	4.325	0.001651	0.00753688	0.00813572	up	up		Promoter	ENSDART00000127959	inositol polyphosphate-4-phosphatase, type Ia [Source:ZFIN;Acc:ZDB-GENE-060312-5]	ENSDARG00000063352
9_77565_78414	850	4.245	0.001836	8.065	1e-06	0.00753688	5.13631e-05	up	up		Promoter	ENSDART00000109758	si:dkey-11f4.7 [Source:ZFIN;Acc:ZDB-GENE-070912-361]	ENSDARG00000074800
